# Supplementary material for: HOAc catalyzed three-component reaction for the synthesis of 3,3′-(arylmethylene)bis(1H-indoles)
Source: Royal Society of Chemistry journal article supplement (doi:10.1039/d2ob00395c), 2022-01-01
Supplement: d2ob00395c1.pdf [file d2ob00395c1.pdf]

## Electronic Supplementary Information

for

### **HOAc catalyzed three-component reaction for the synthesis of 3,3'- (arylmethylene)bis(1*H*-indoles)**

Heng Li, Yan Zhu, Cong Jiang, Jia Wei, Ping Liu,\* and Peipei Sun\*

*School of Chemistry and Materials Science, Jiangsu Provincial Key Laboratory of Material Cycle  
Processes and Pollution Control, Jiangsu Collaborative Innovation Center of Biomedical  
Functional Materials, Nanjing Normal University, Nanjing 210023, China.*

*pingliu@njnu.edu.cn; sunpeipei@njnu.edu.cn*

#### **Contents**

1. Mechanistic investigations.....S2
2. Copies of <sup>1</sup>H and <sup>13</sup>C NMR spectra of products **3** and **5a**.....S3-S86

## 1. Mechanistic investigation

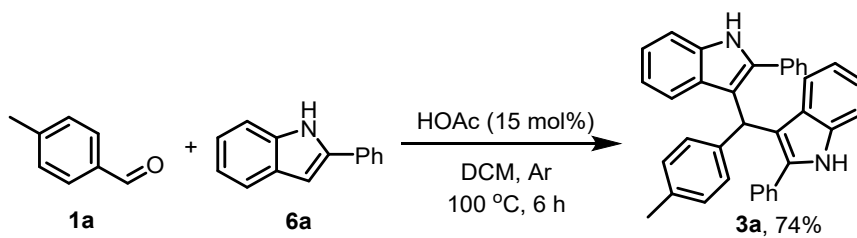

To a 25 mL sealed reaction tube, 4-methylbenzaldehyde (**1a**, 0.6 mmol, 72.1 mg), 2-phenylindole (**6a**, 1.0 mmol, 193.1 mg), HOAc (15 mol%, 4.5 mg) and DCM (5.0 mL) were added. The reaction mixture was heated at 100 °C under Ar conditions until TLC (petroleum ether/ethyl acetate, 10:1, v/v) revealed that the reaction completed (about 6 hours). Then the reaction mixture was cooled to room temperature and diluted with 10 mL water. The mixture was extracted with DCM. The combined organic layers were dried over Na<sub>2</sub>SO<sub>4</sub> and concentrated in vacuum, and the resulting residue was purified by flash column chromatography (silica gel, mixtures of petroleum ether/ethyl acetate, 20:1, v/v) to afford the product **3a** (180.8 mg, 74%) as a white solid.

## 2. Copies of $^1\text{H}$ and $^{13}\text{C}$ NMR spectra of products 3 and 5a

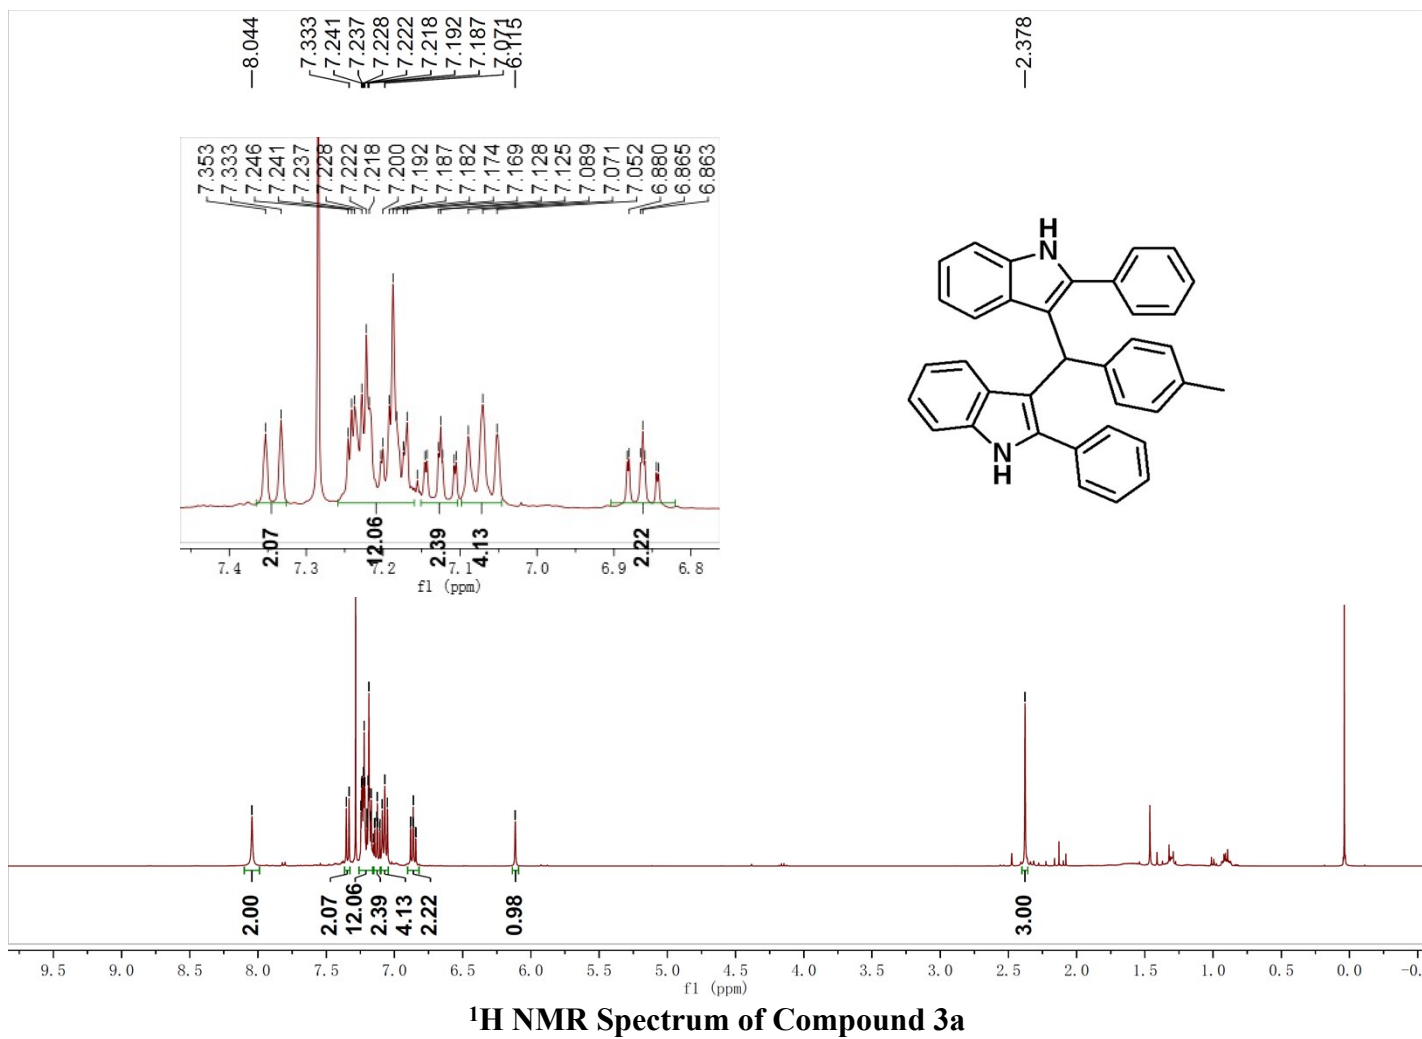

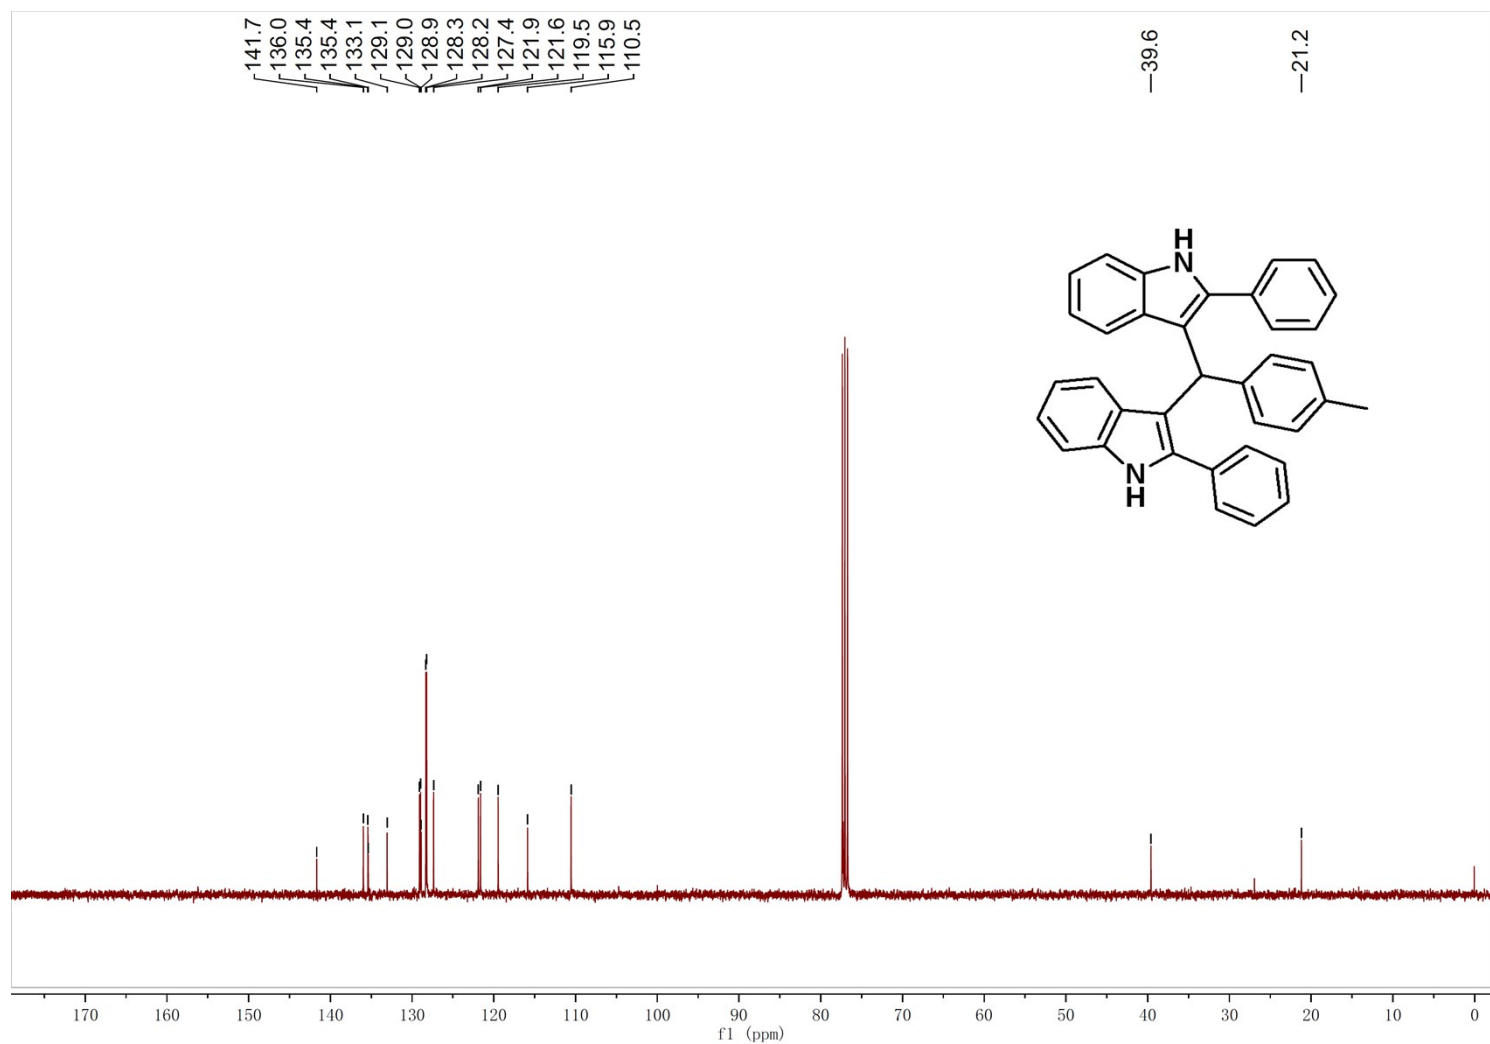

$^{13}\text{C}$  NMR Spectrum of Compound 3a

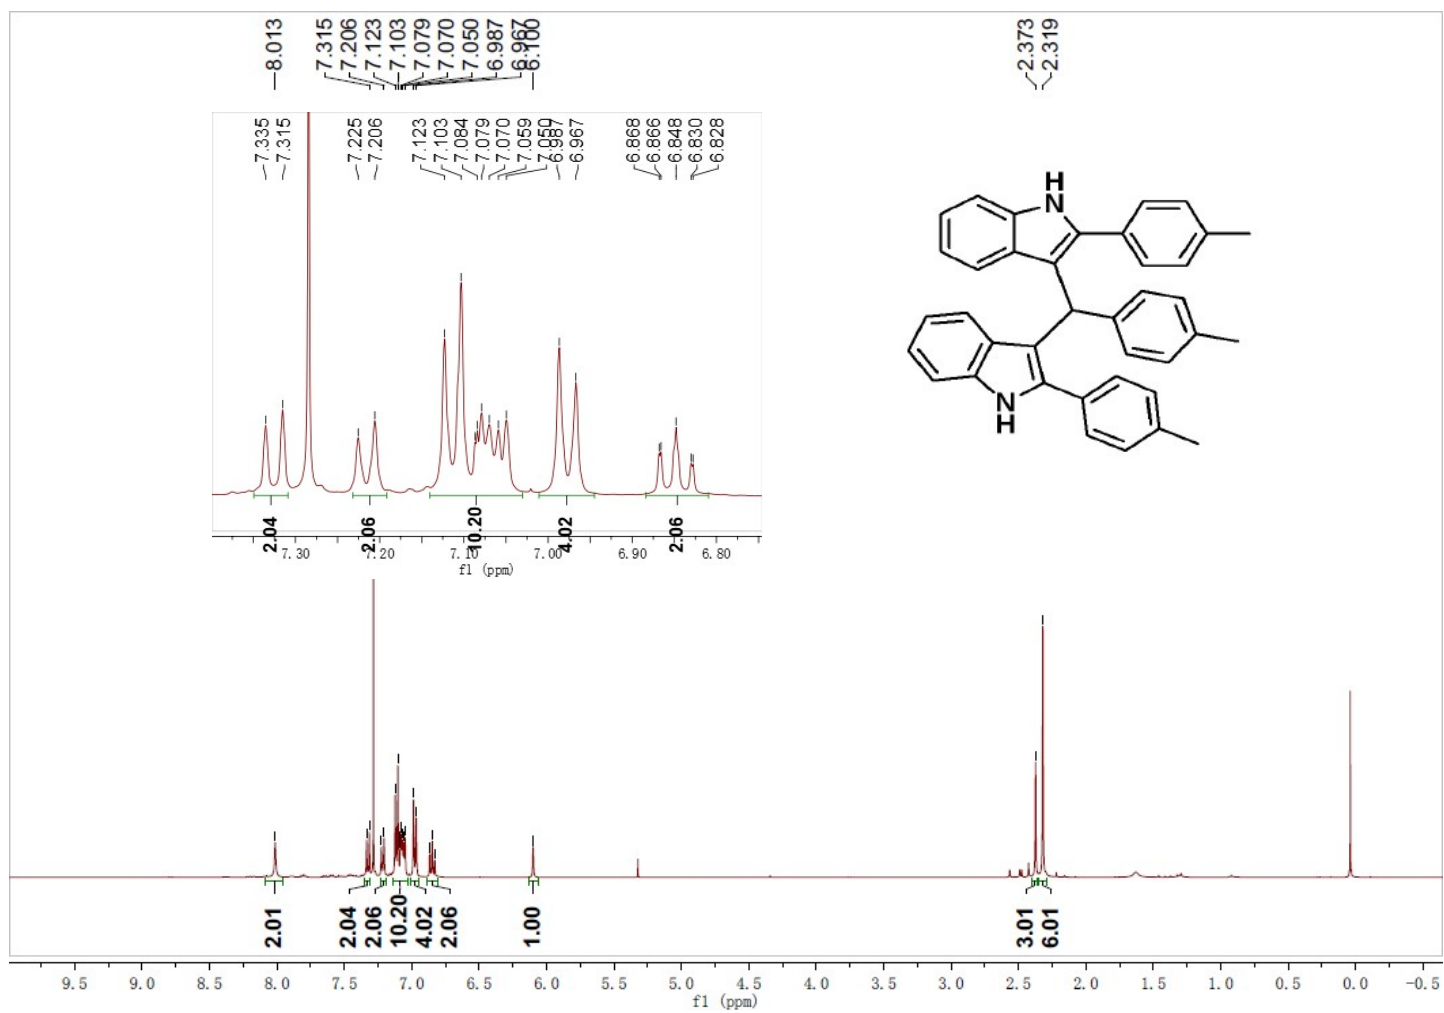

**<sup>1</sup>H NMR Spectrum of Compound 3b**

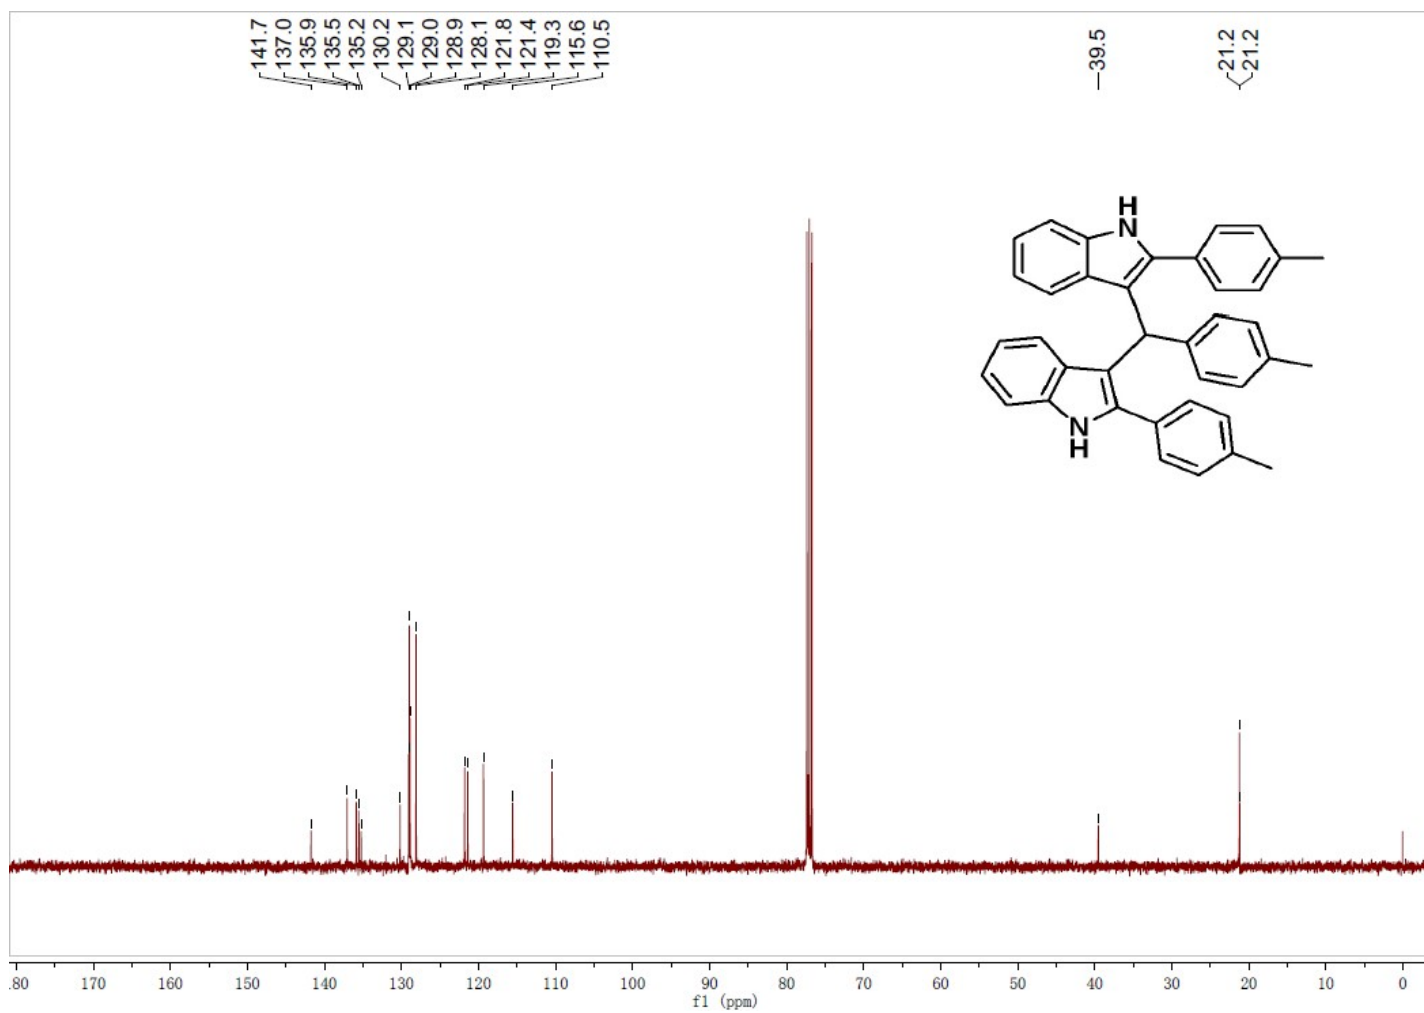

$^{13}\text{C}$  NMR Spectrum of Compound 3b

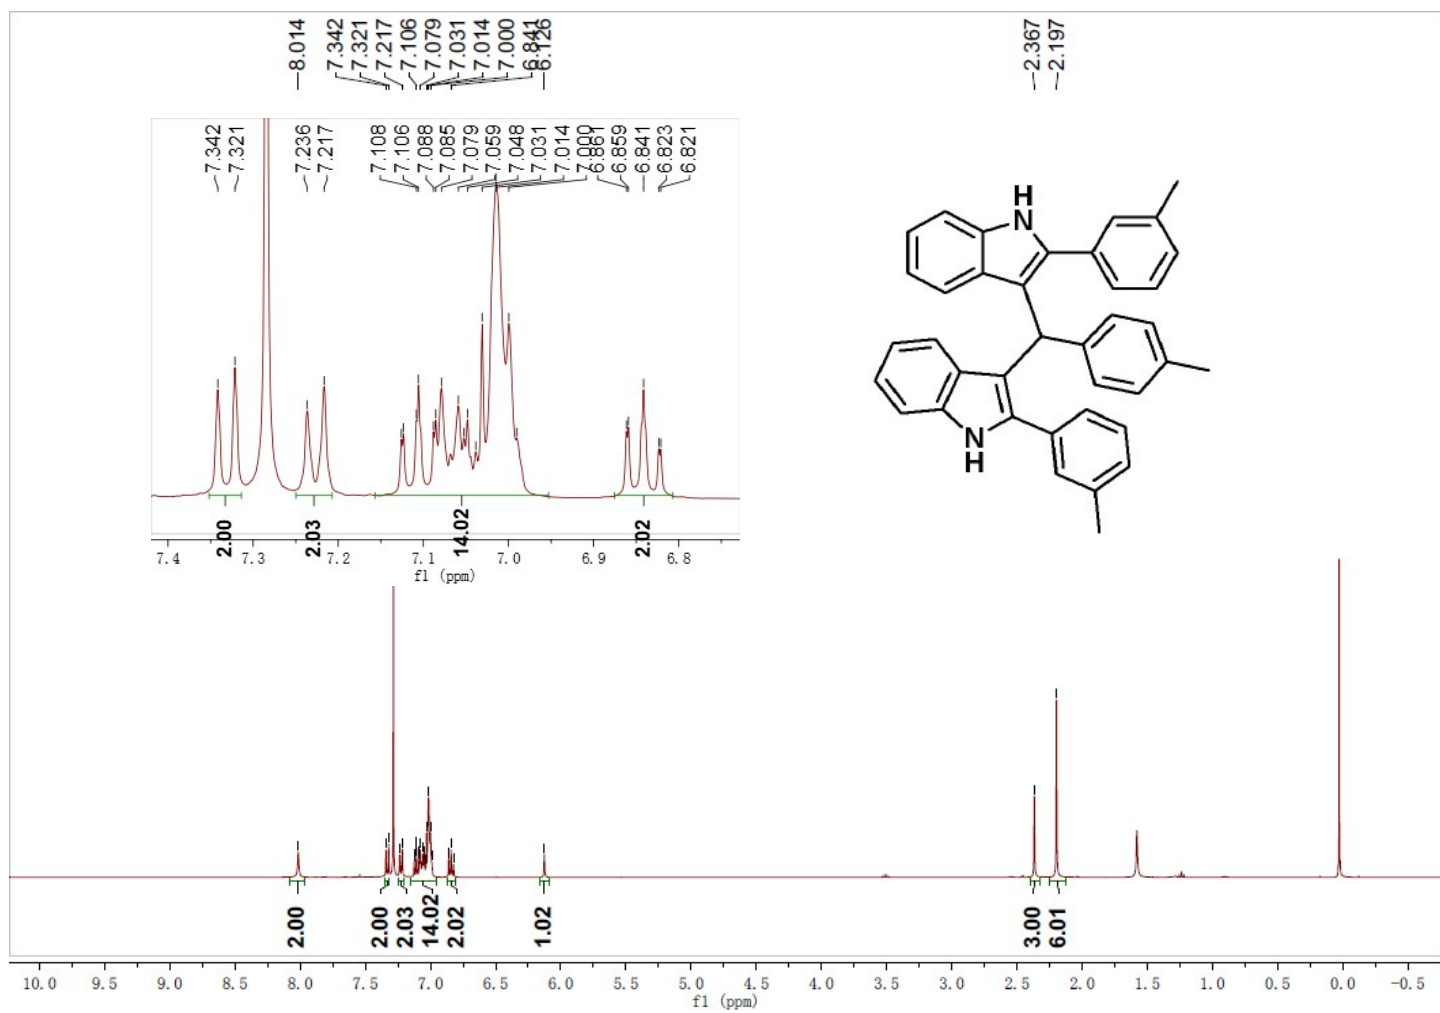

**<sup>1</sup>H NMR Spectrum of Compound 3c**

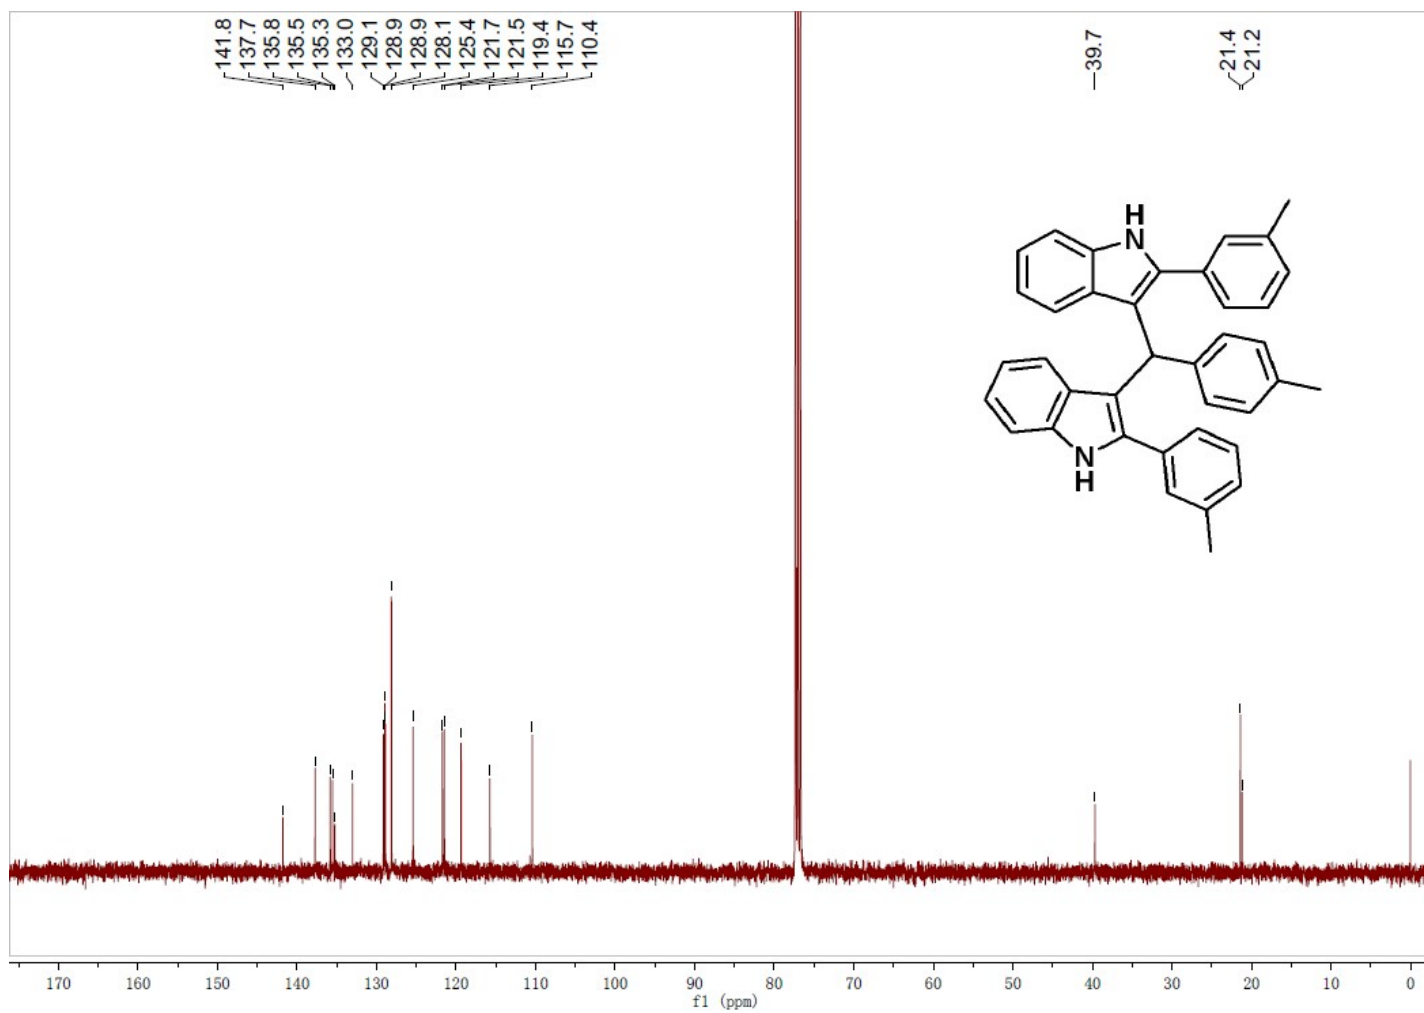

$^{13}\text{C}$  NMR Spectrum of Compound 3c





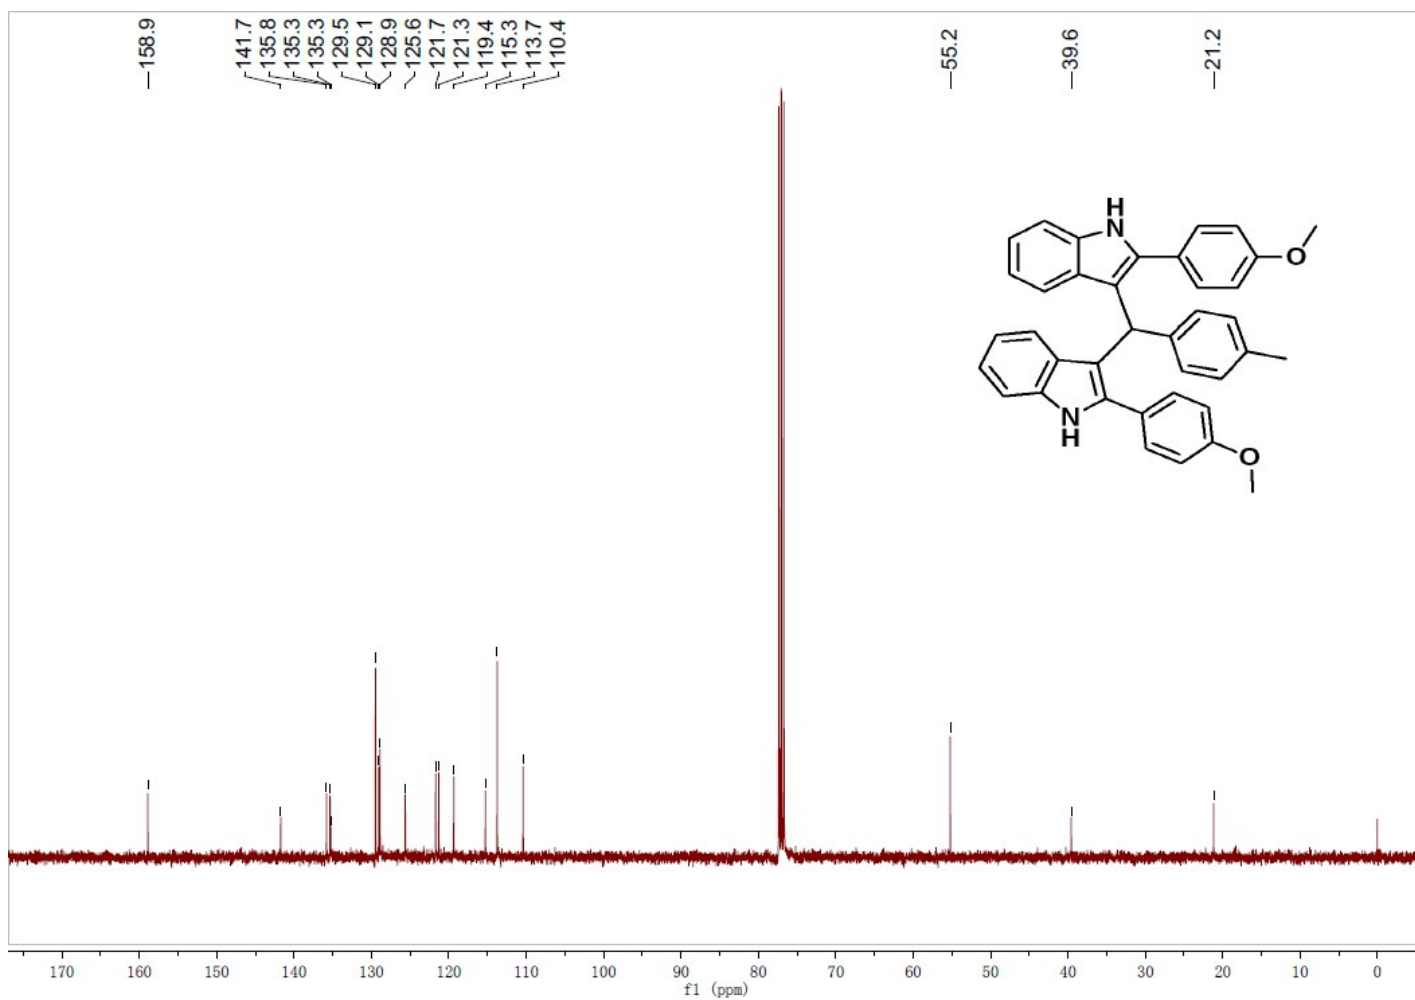

<sup>13</sup>C NMR Spectrum of Compound 3d

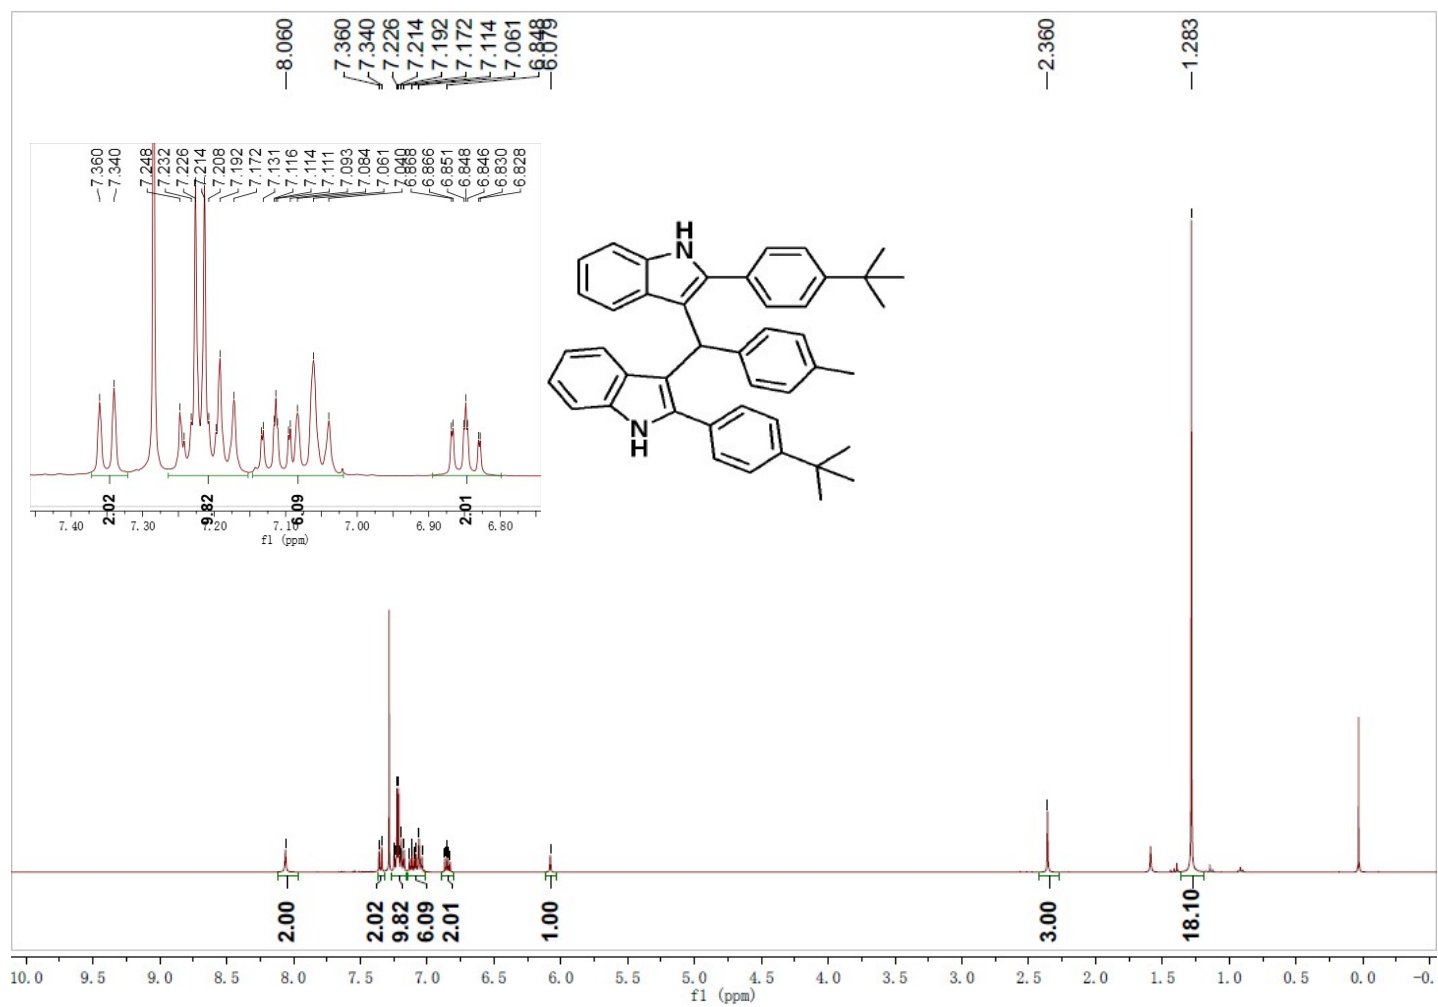

**<sup>1</sup>H NMR Spectrum of Compound 3e**

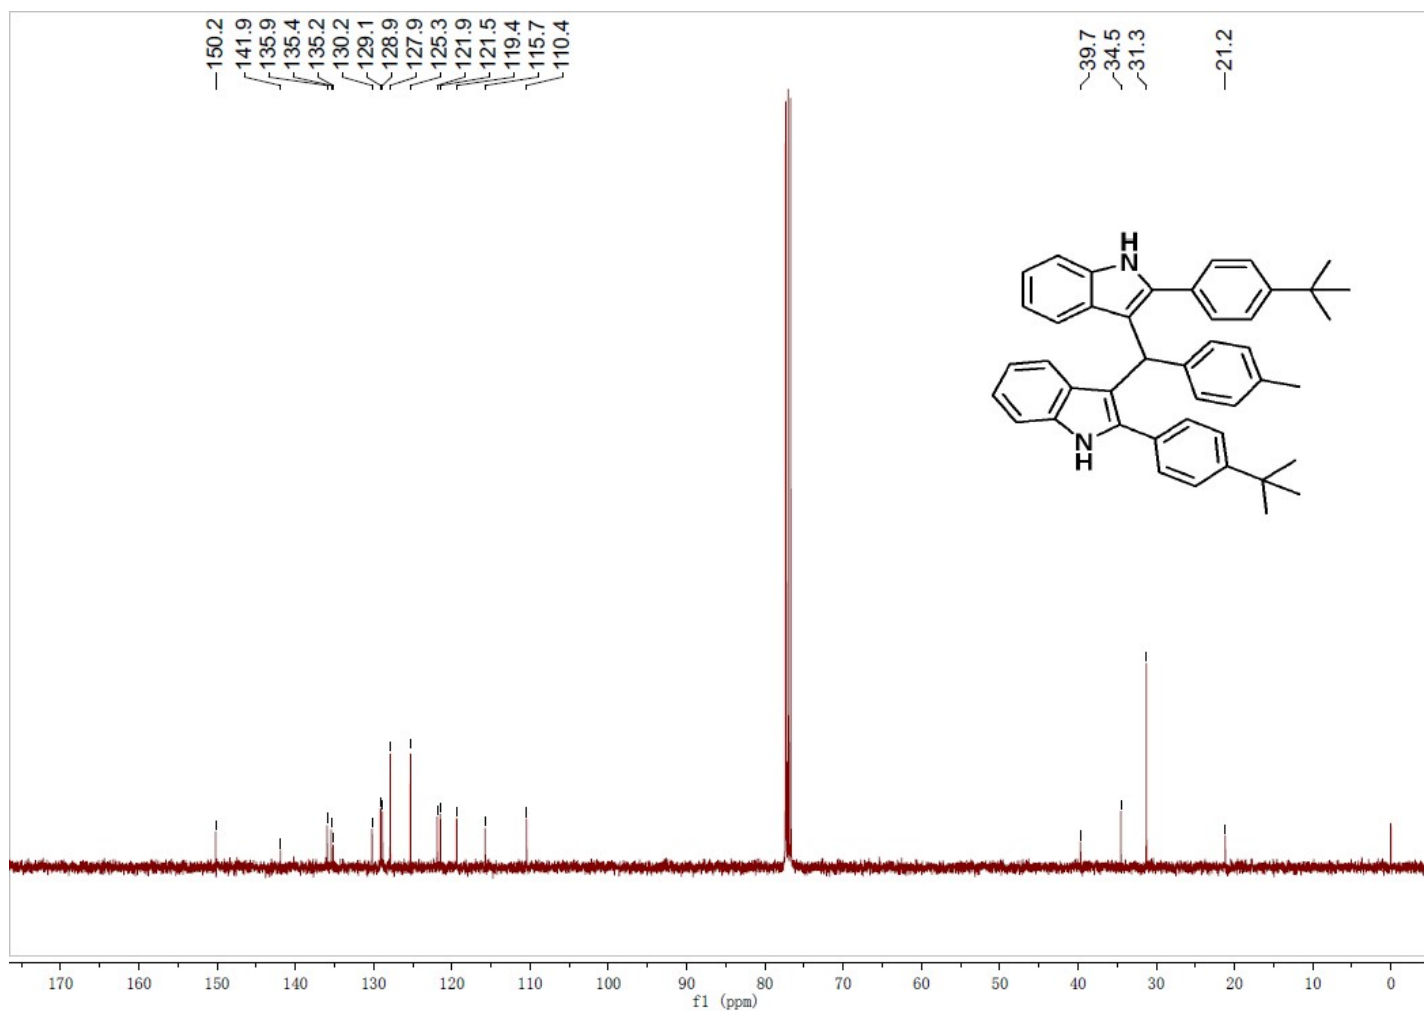

**<sup>13</sup>C NMR Spectrum of Compound 3e**

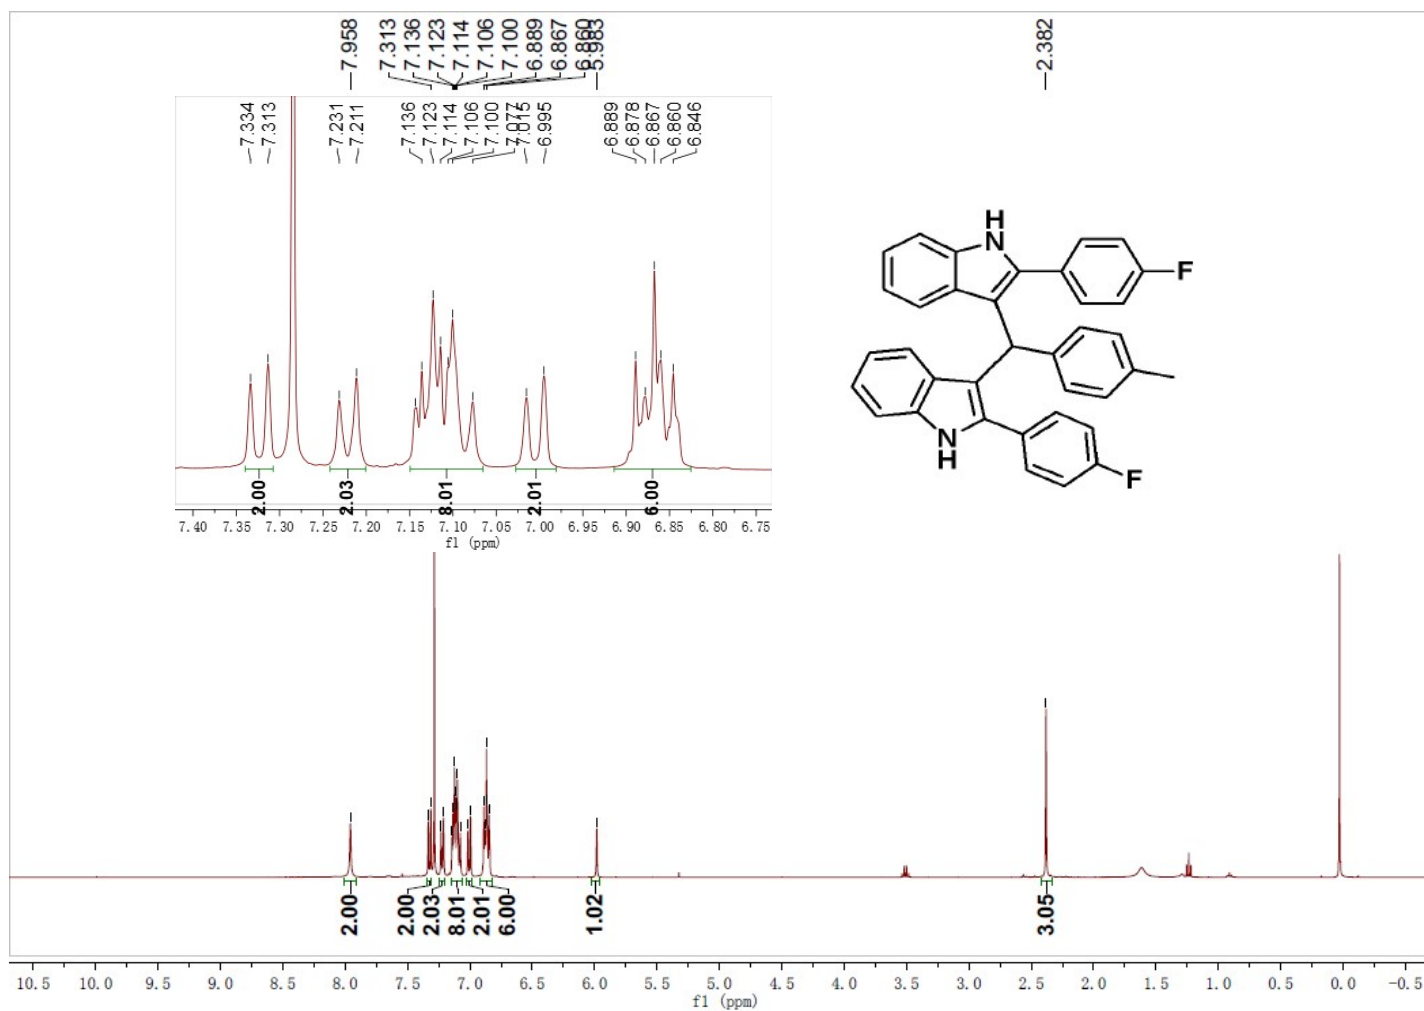

**<sup>1</sup>H NMR Spectrum of Compound 3f**

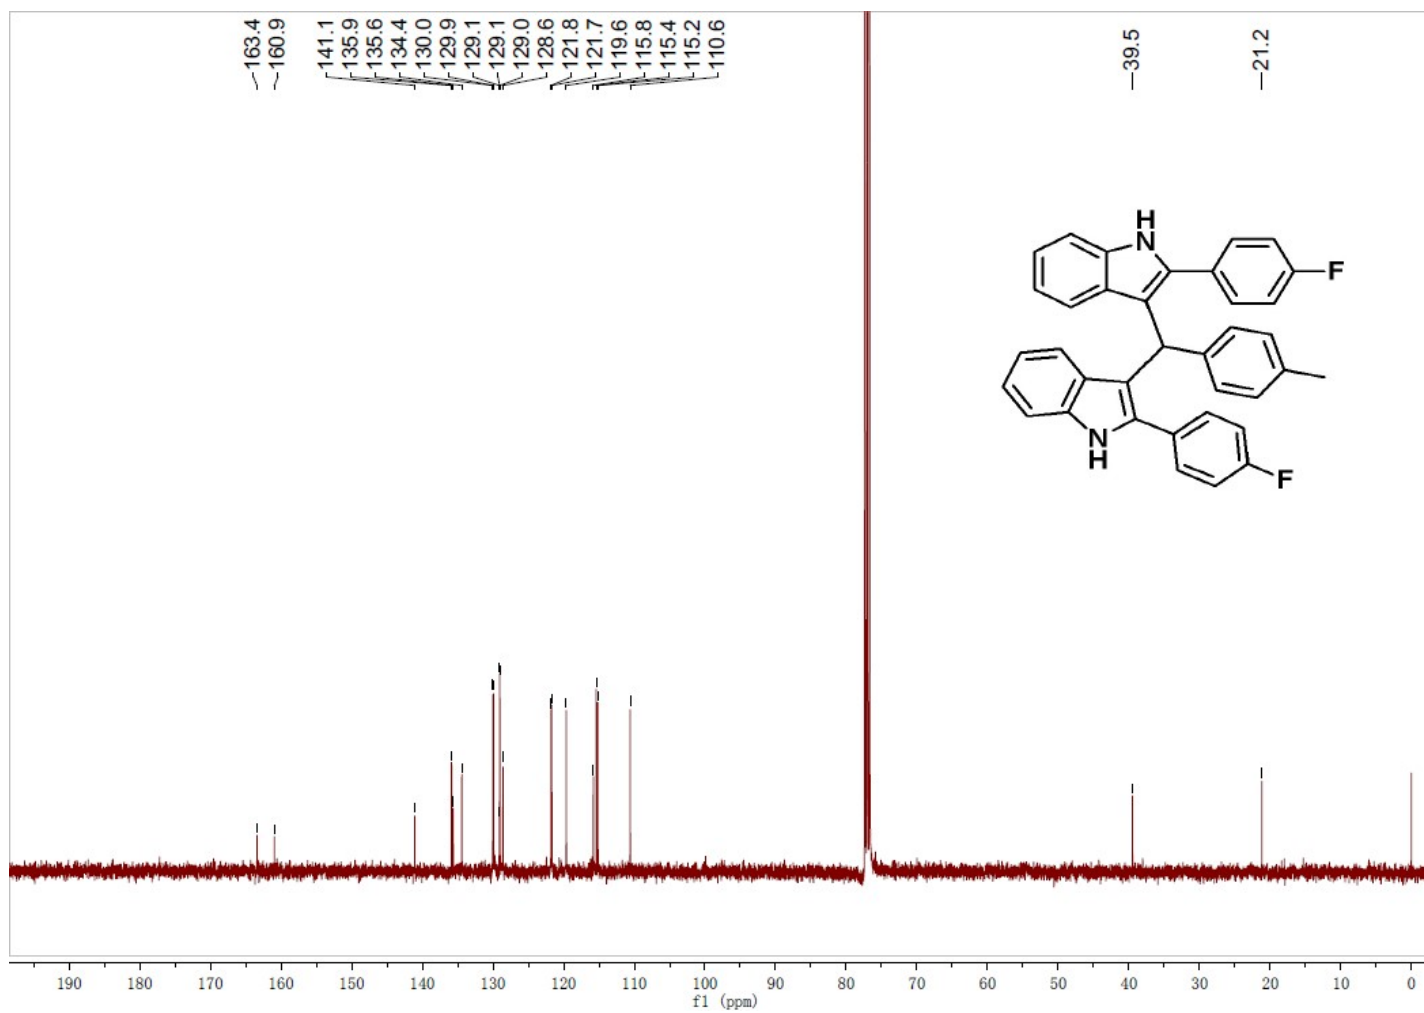

**<sup>13</sup>C NMR Spectrum of Compound 3f**

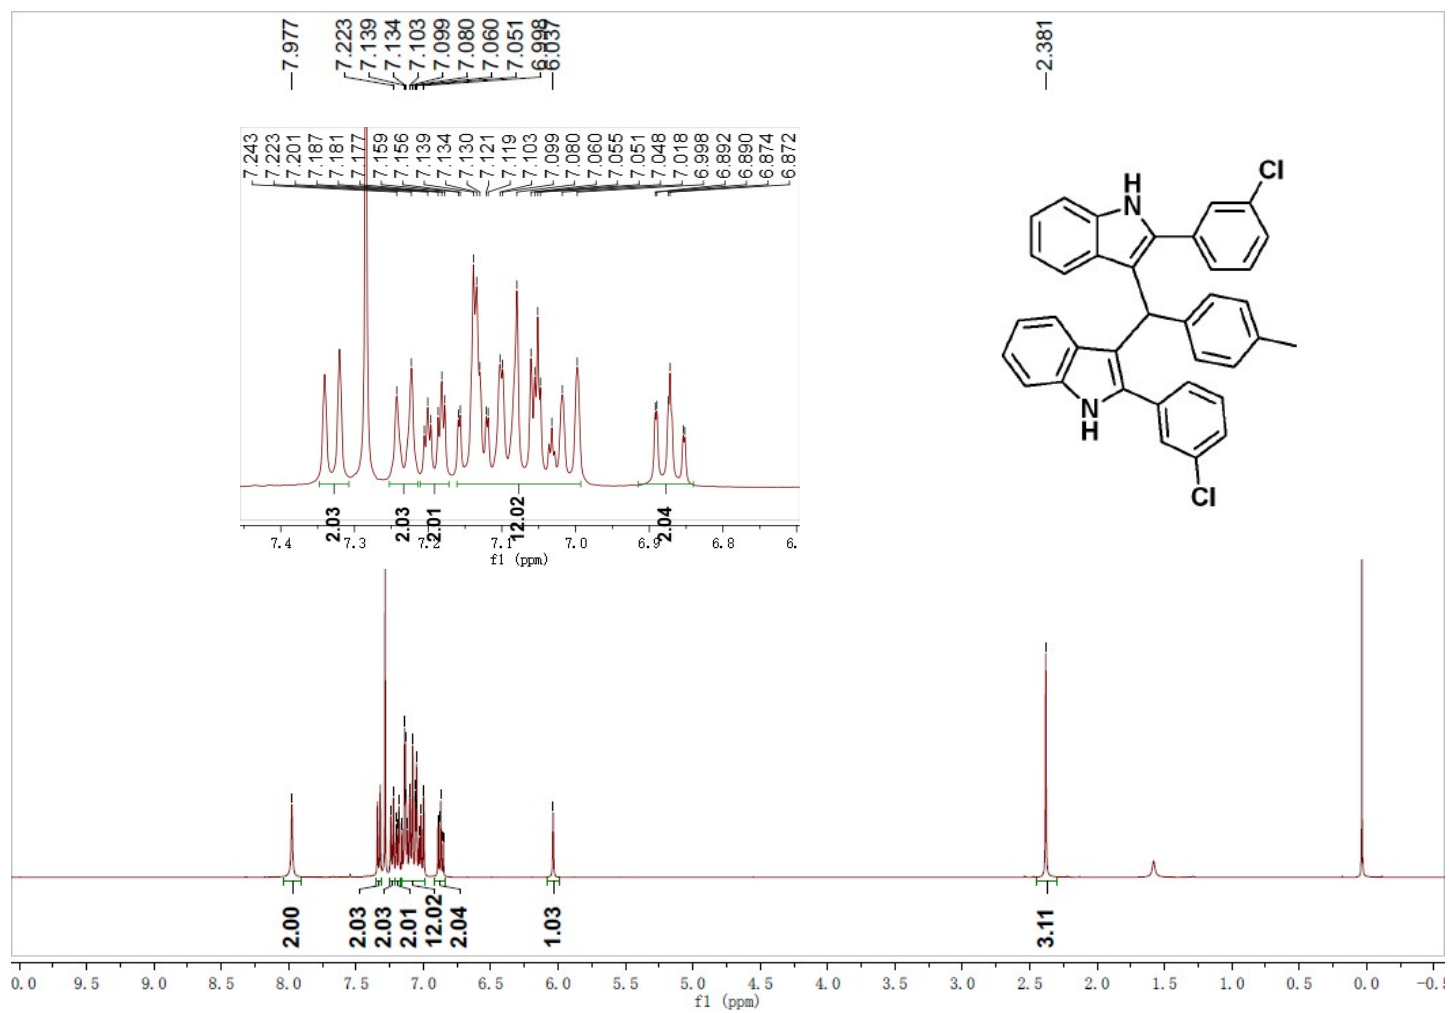

**<sup>1</sup>H NMR Spectrum of Compound 3g**

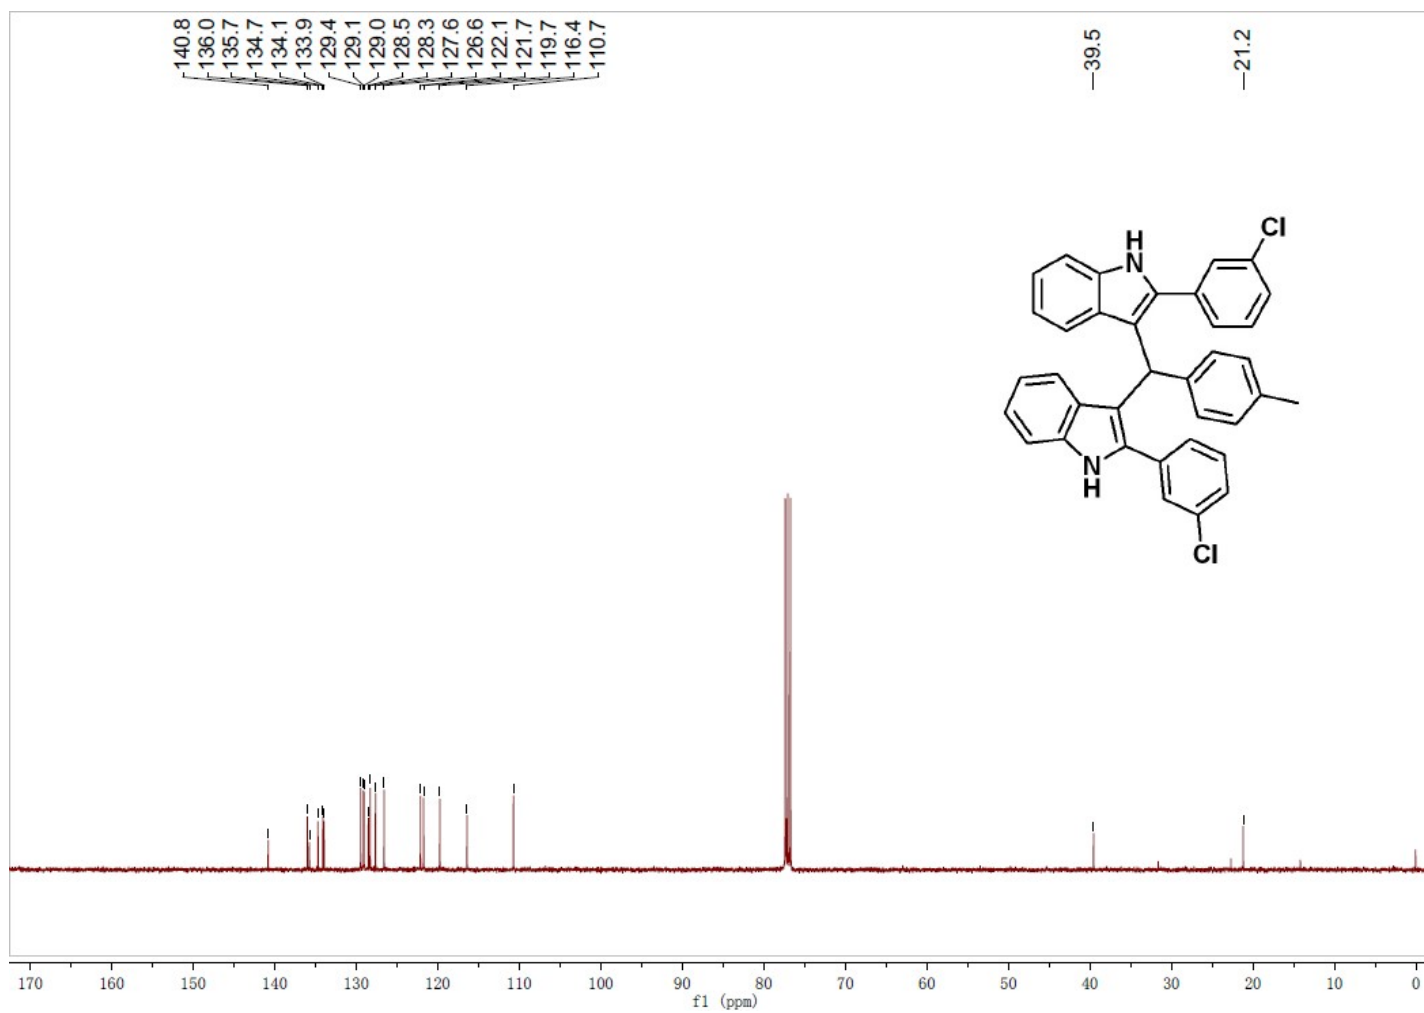

**<sup>13</sup>C NMR Spectrum of Compound 3g**



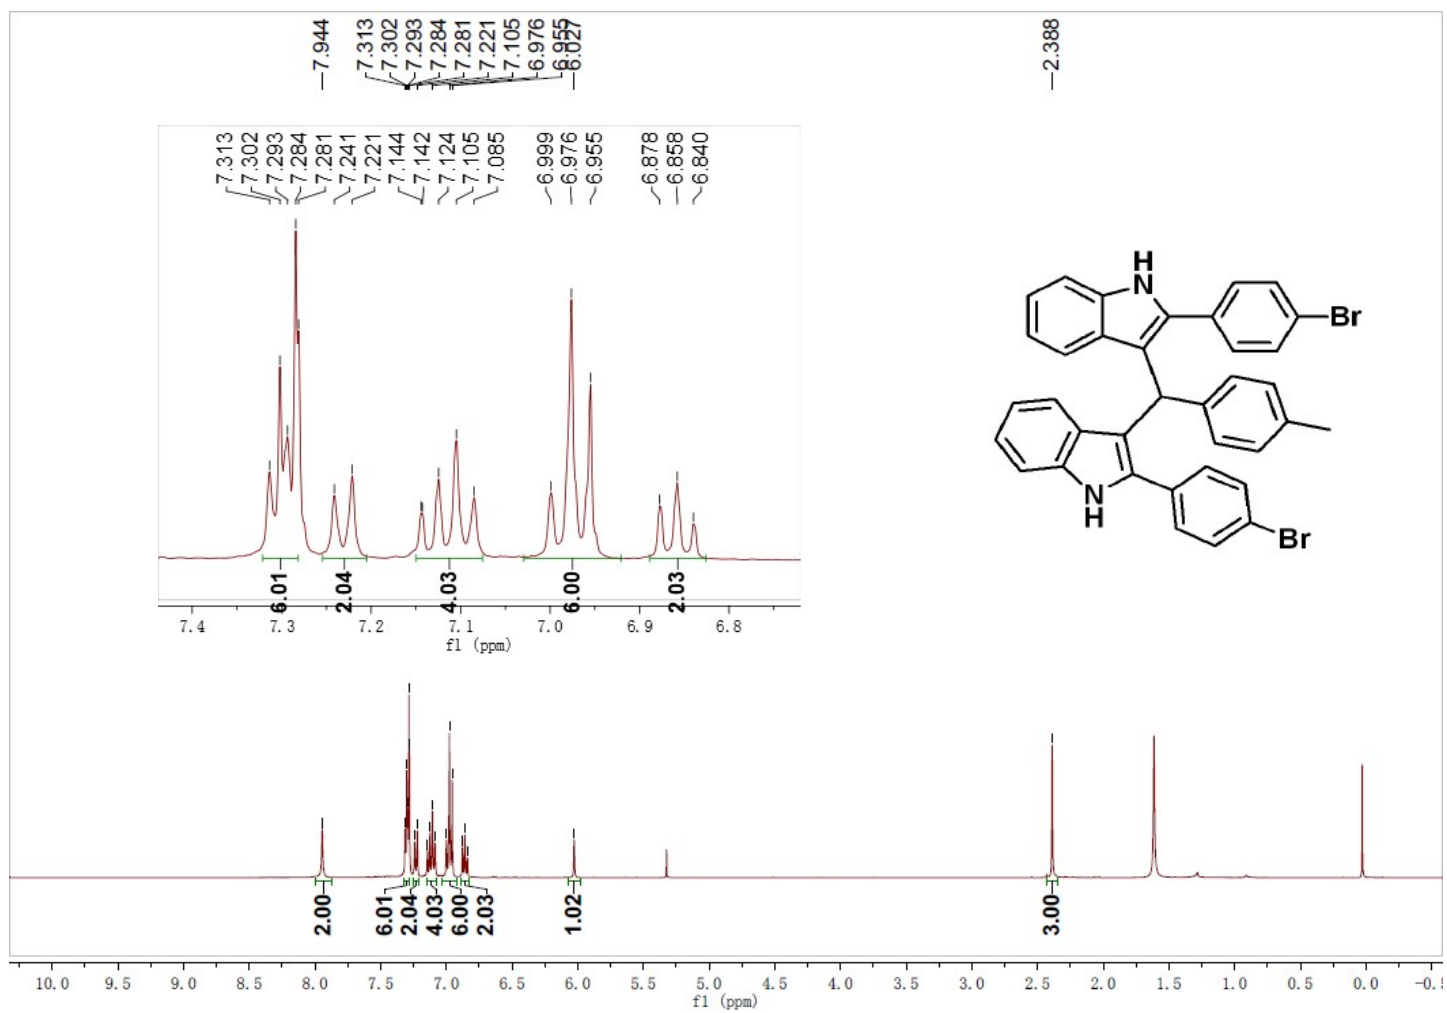

<sup>1</sup>H NMR Spectrum of Compound 3h

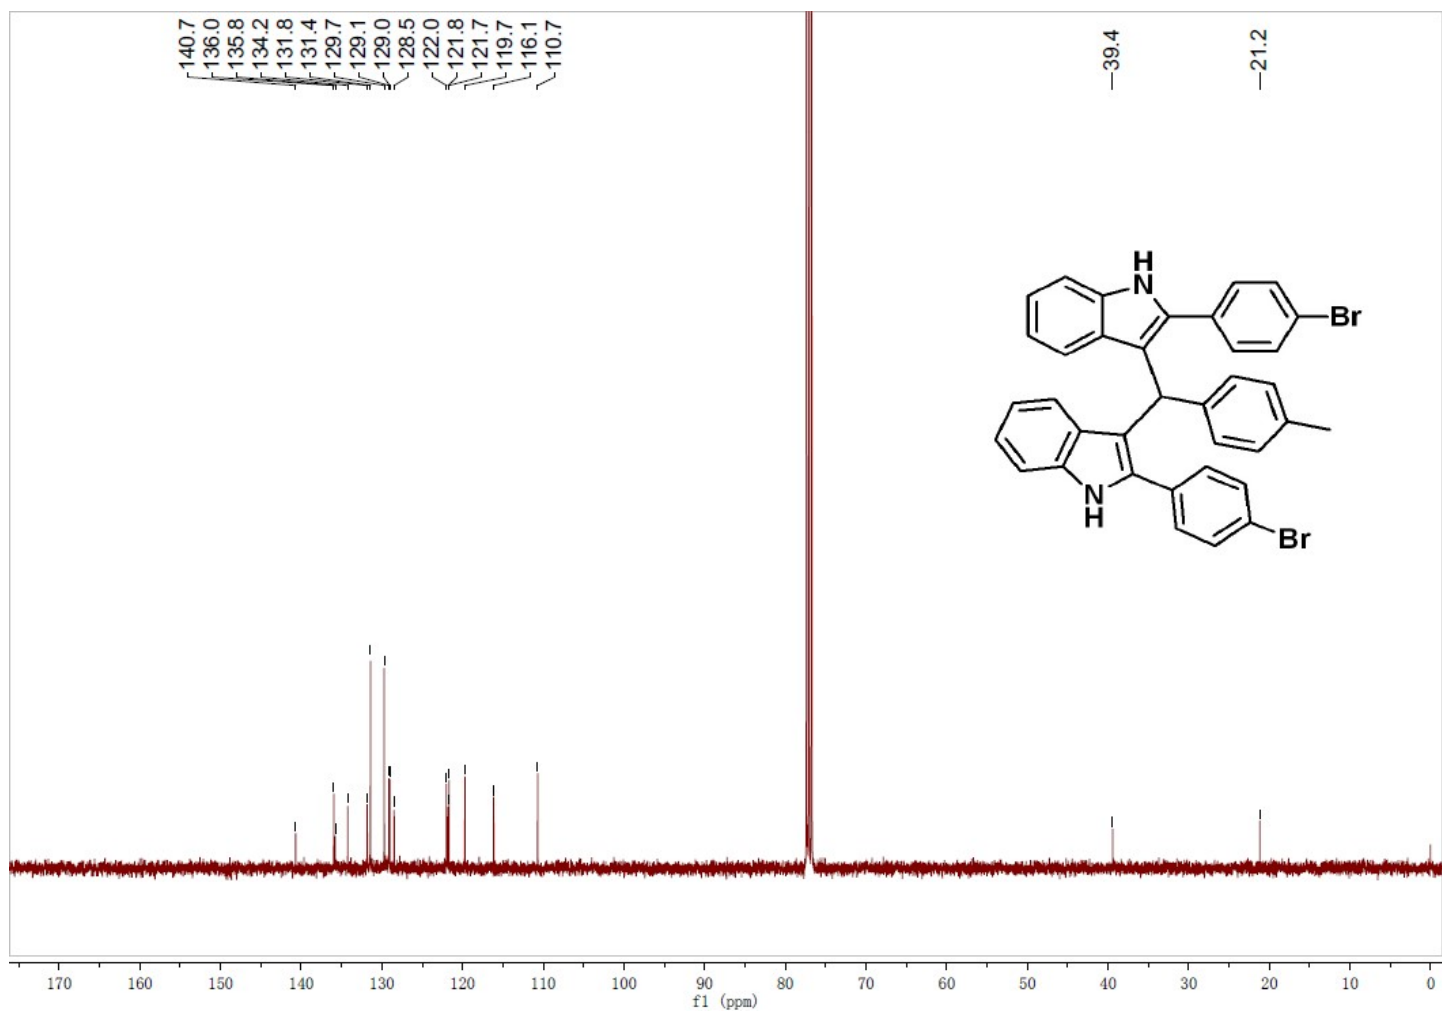

**<sup>13</sup>C NMR Spectrum of Compound 3h**

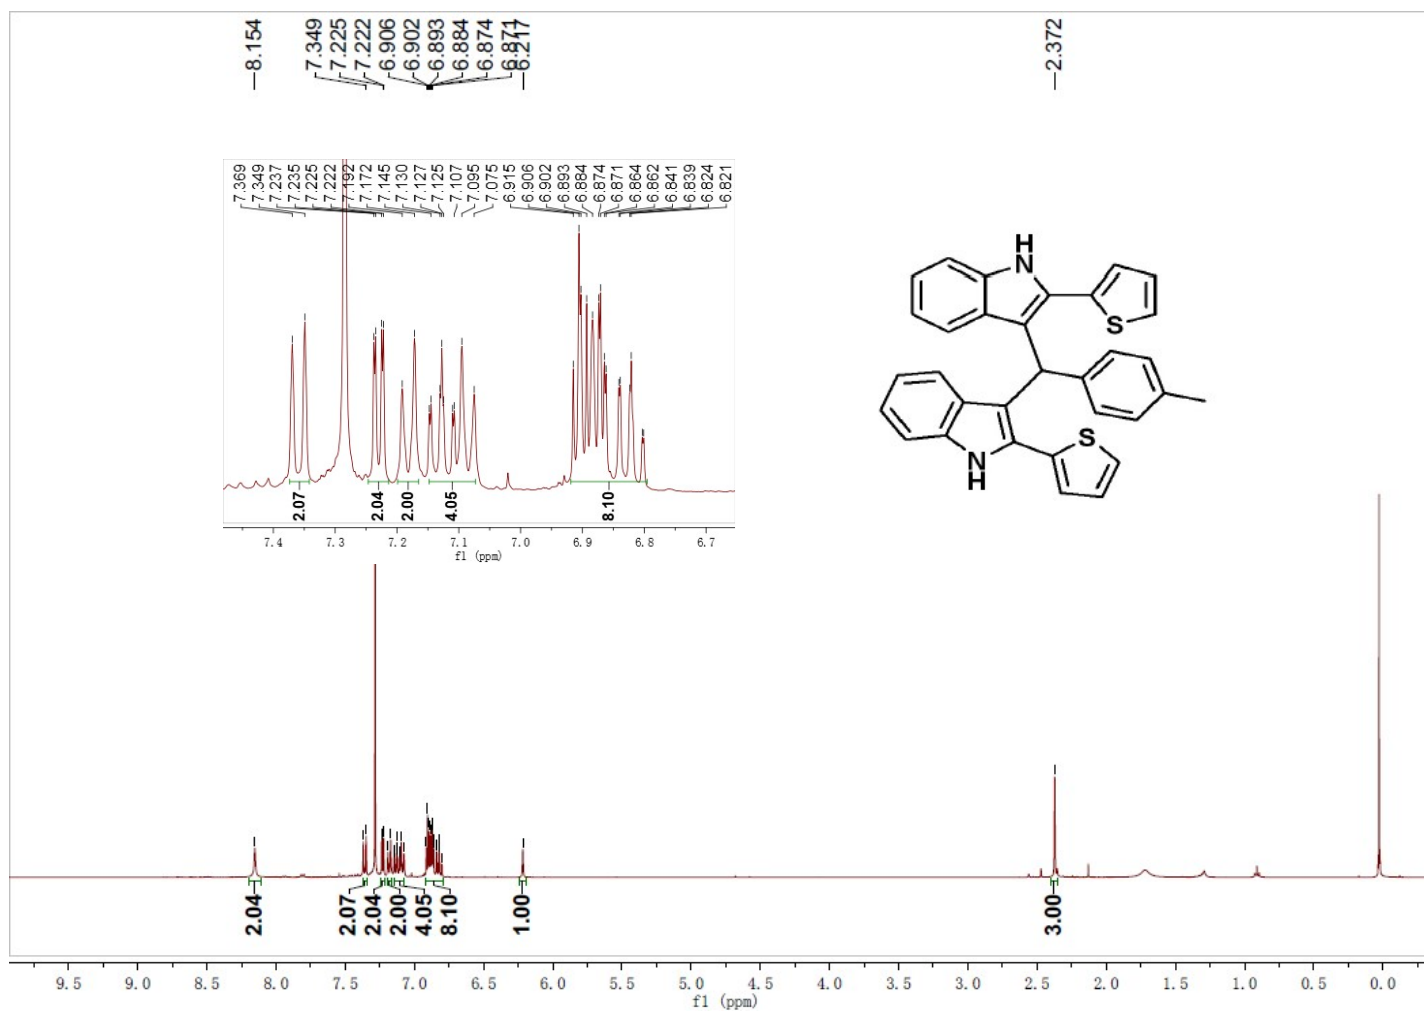

**<sup>1</sup>H NMR Spectrum of Compound 3i**

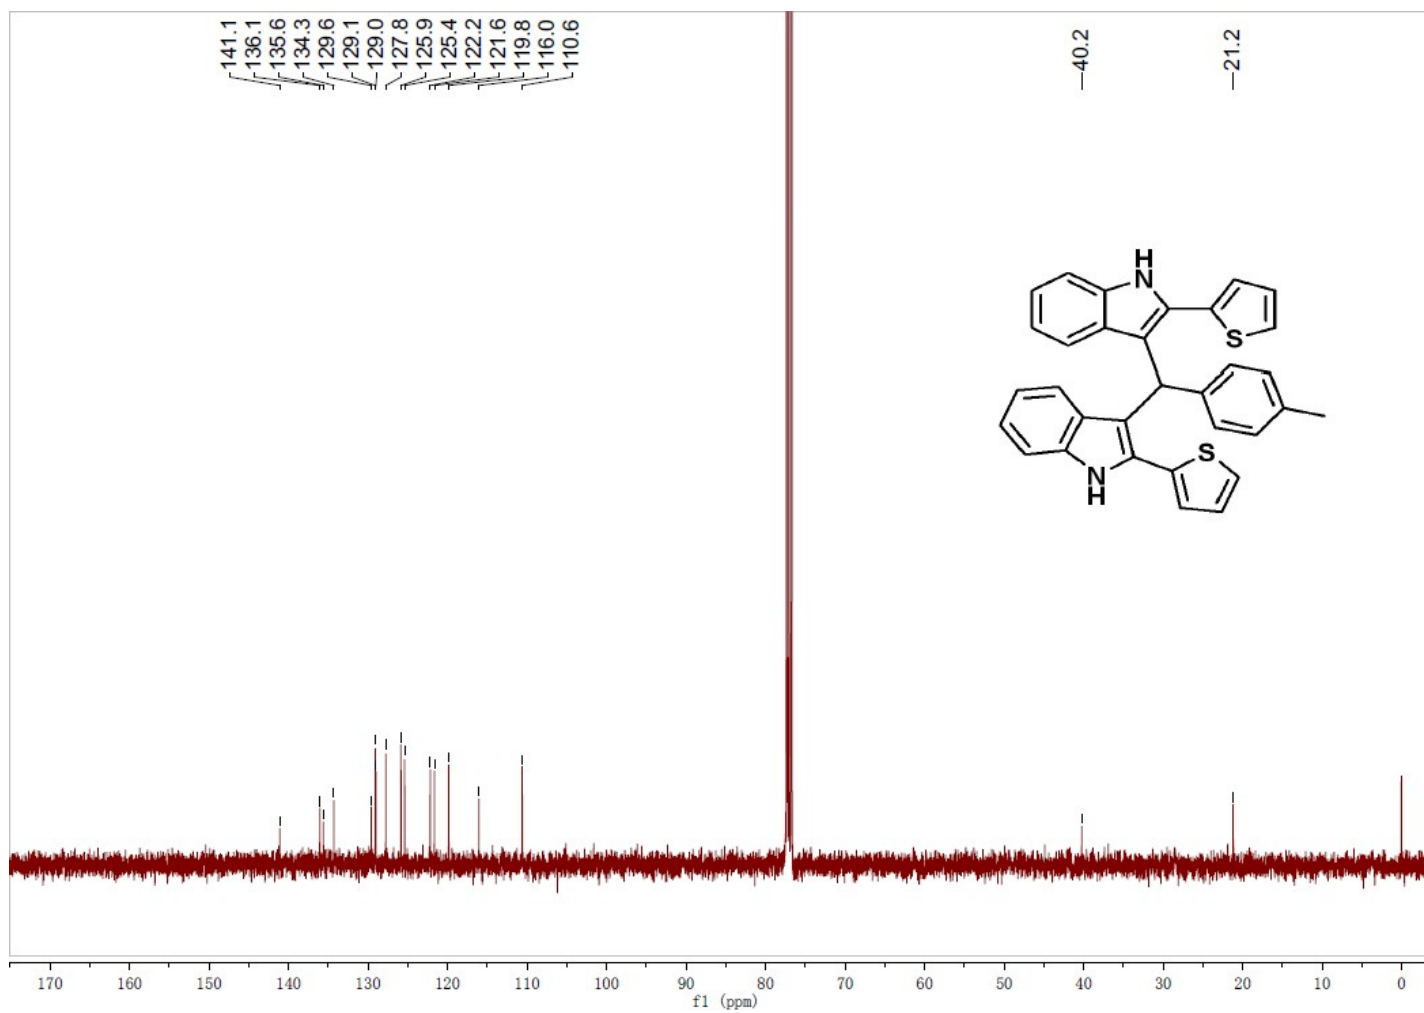

$^{13}\text{C}$  NMR Spectrum of Compound 3i

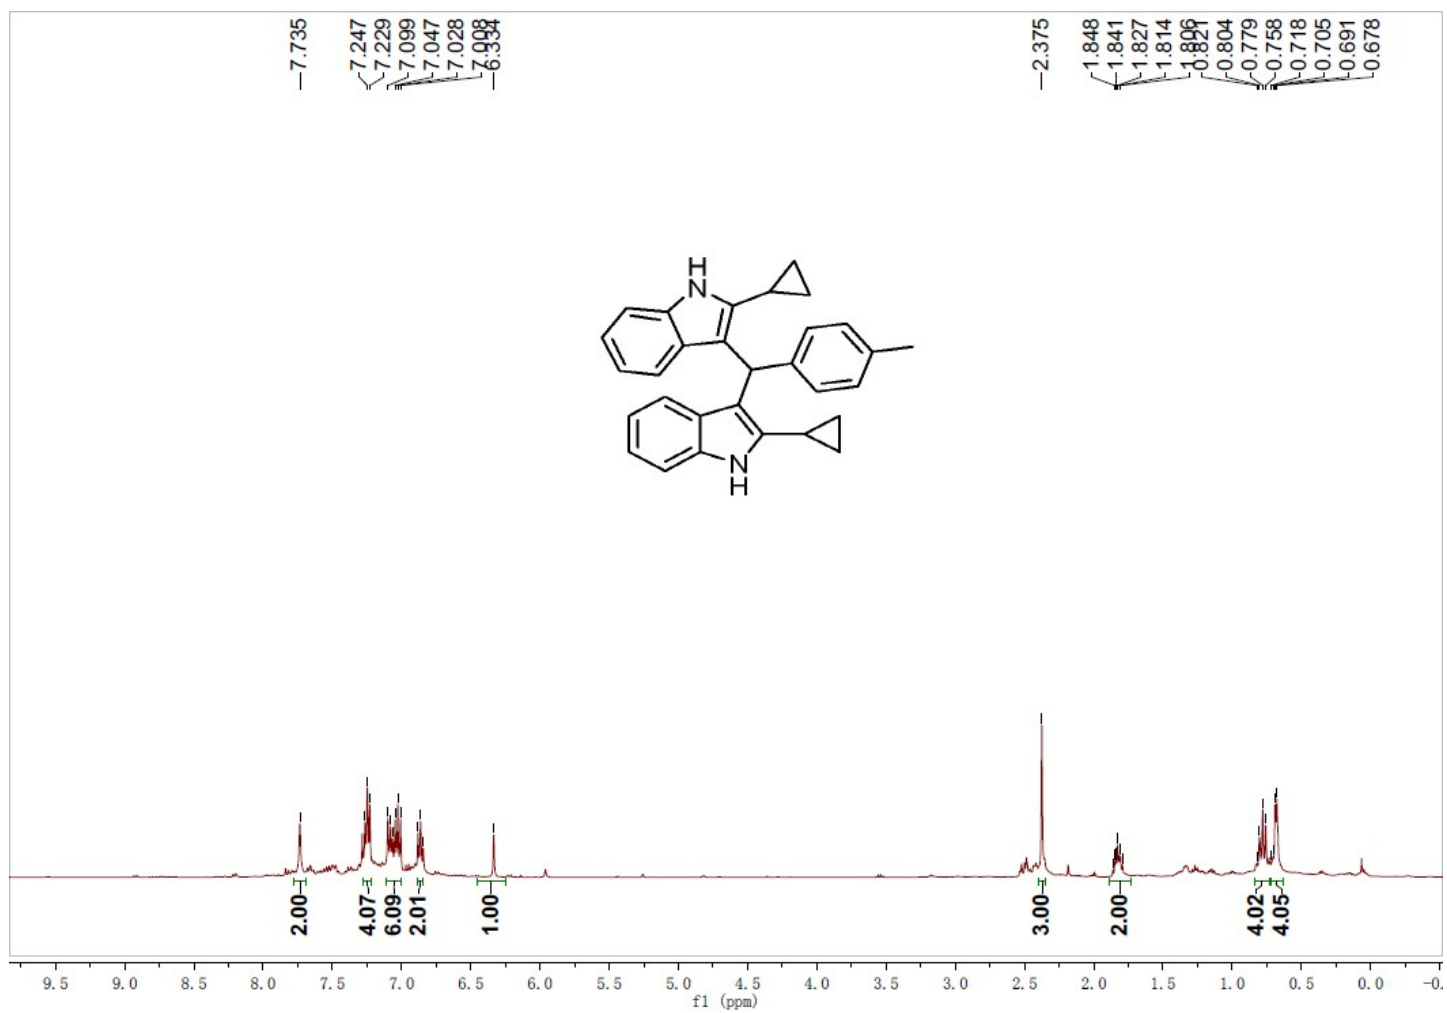

**<sup>1</sup>H NMR Spectrum of Compound 3j**

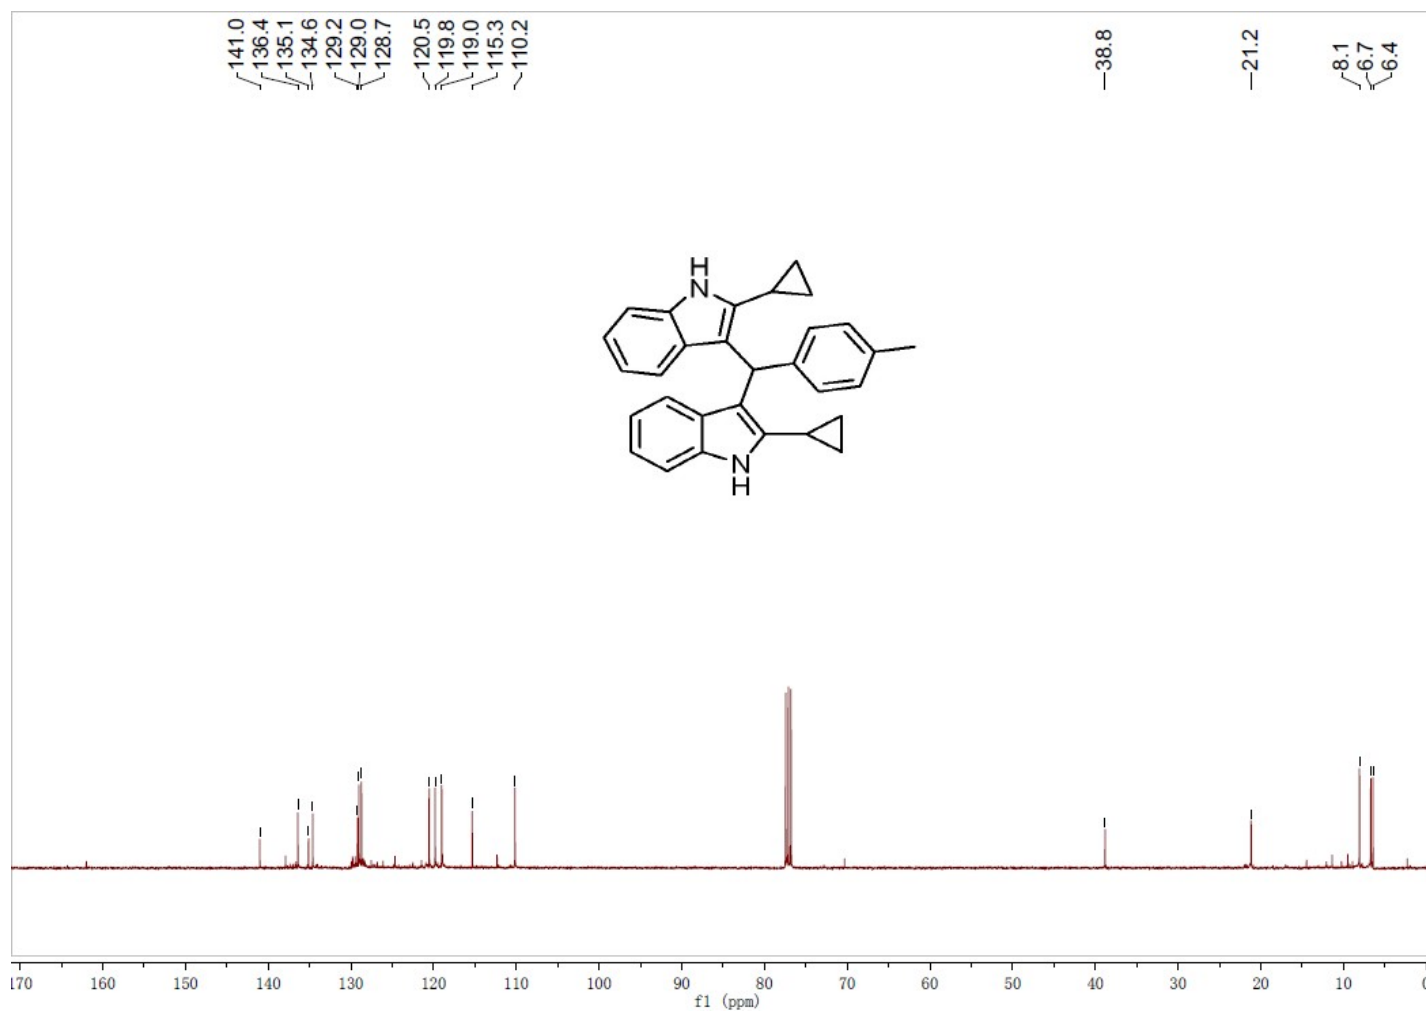

**<sup>13</sup>C NMR Spectrum of Compound 3j**

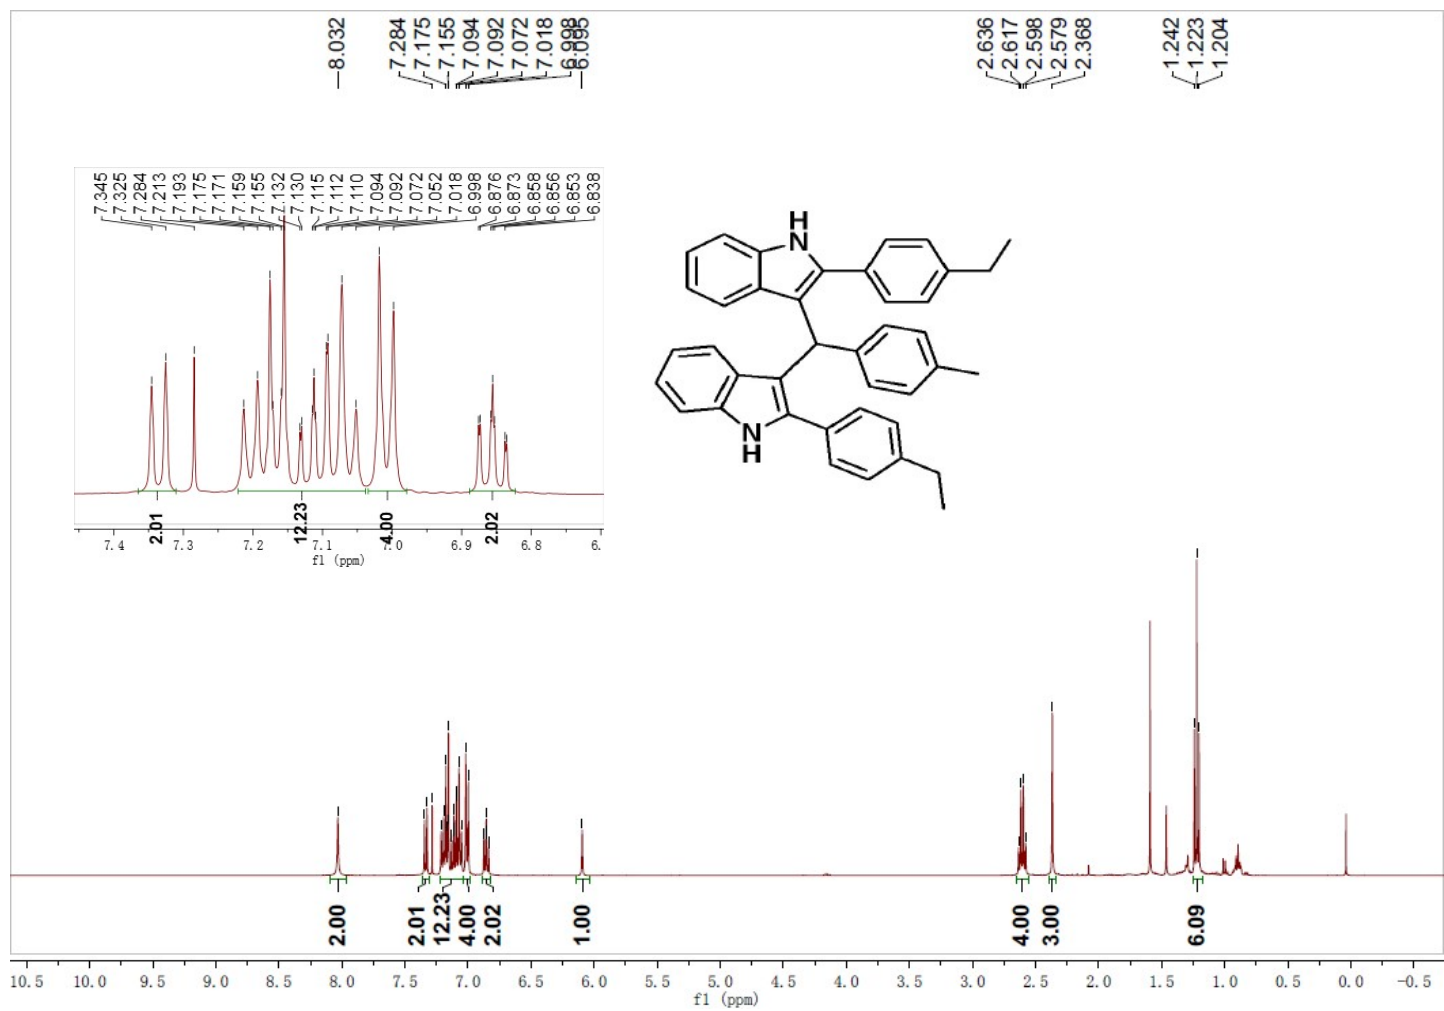

**<sup>1</sup>H NMR Spectrum of Compound 3k**

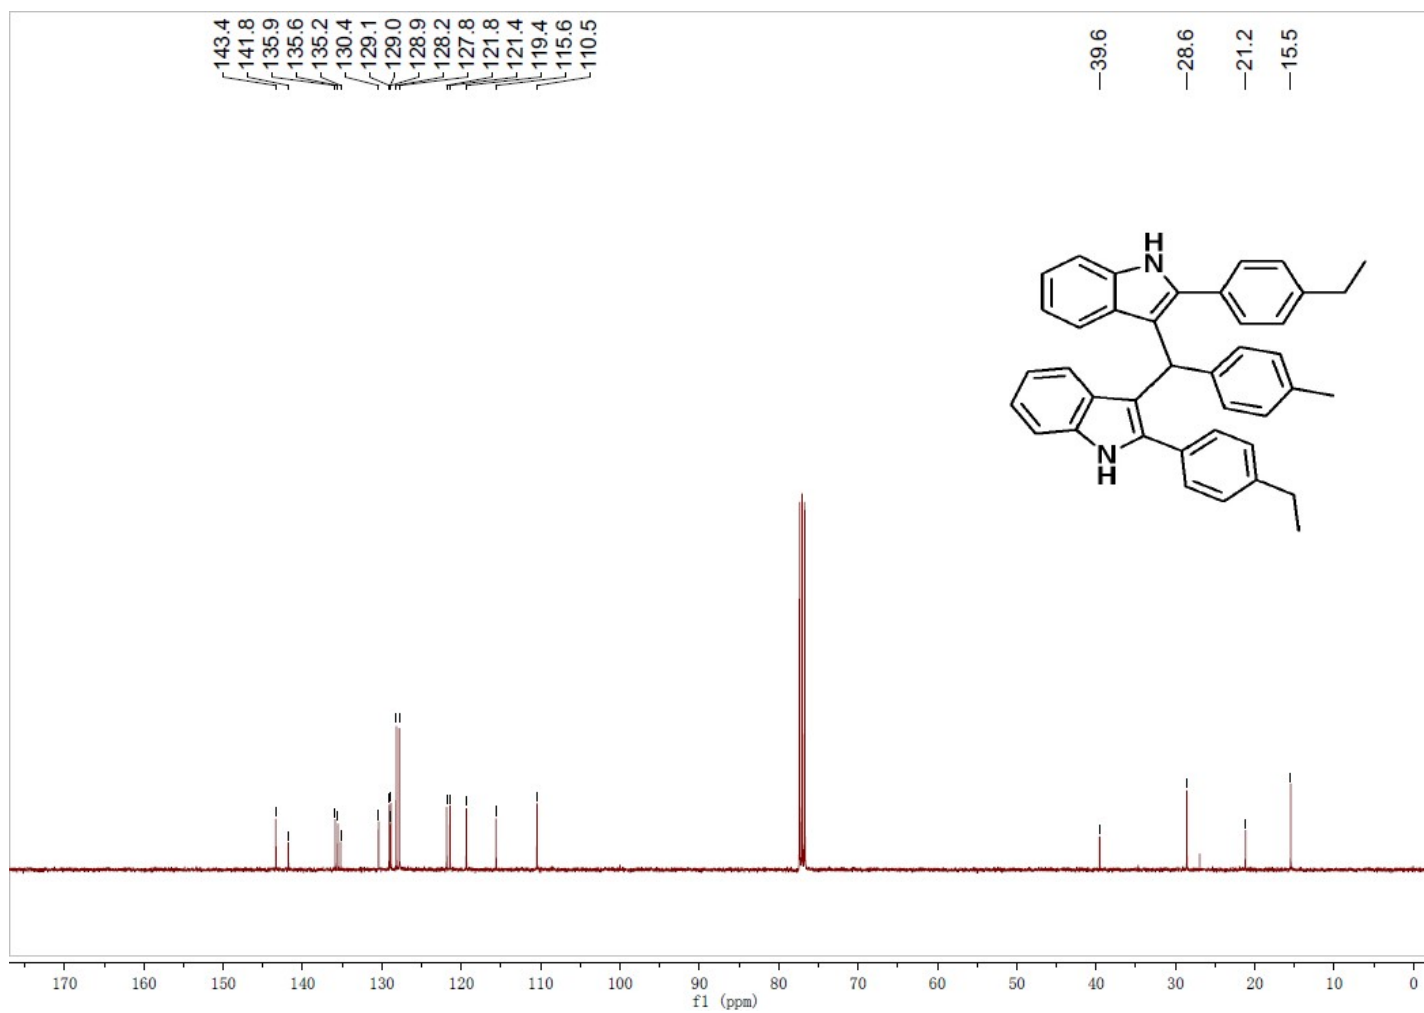

<sup>13</sup>C NMR Spectrum of Compound 3k





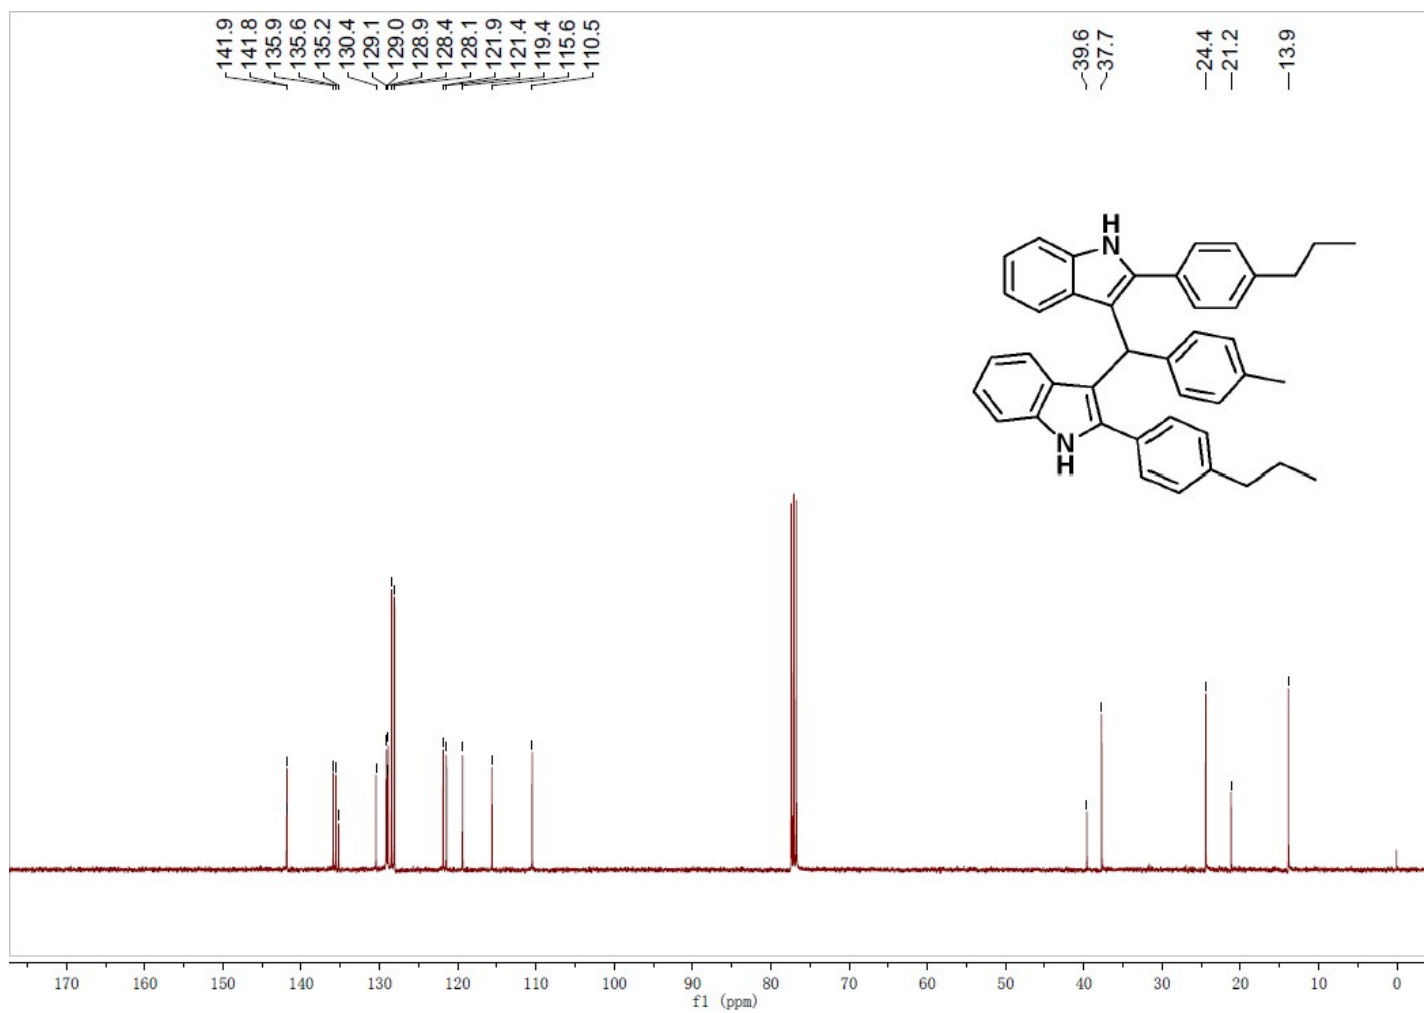

$^{13}\text{C}$  NMR Spectrum of Compound 31

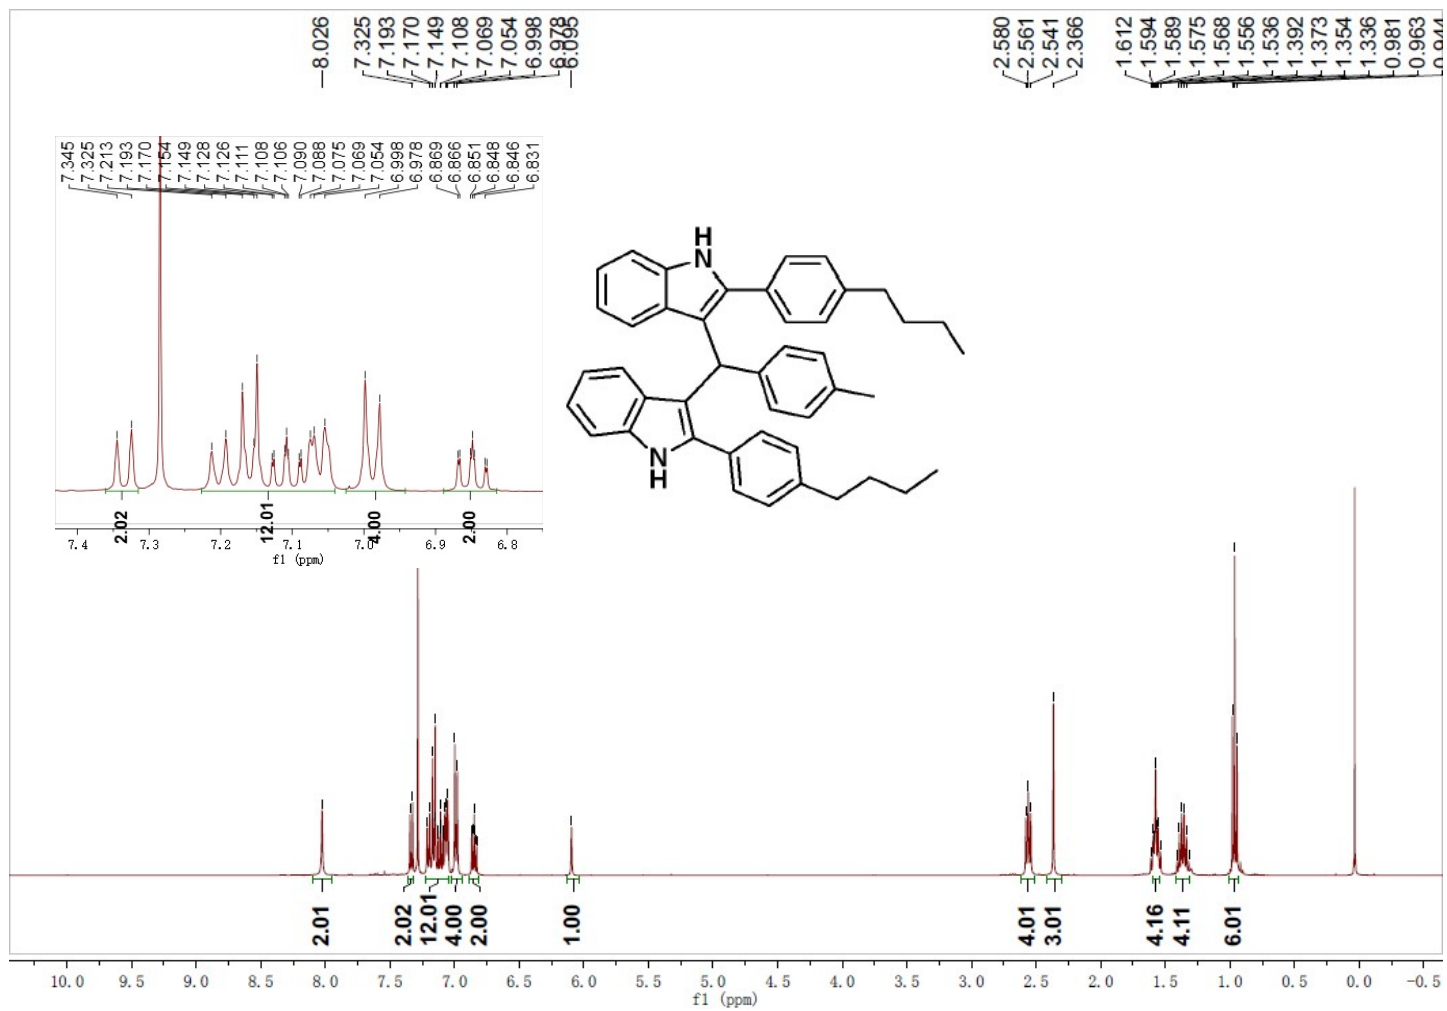

**<sup>1</sup>H NMR Spectrum of Compound 3m**

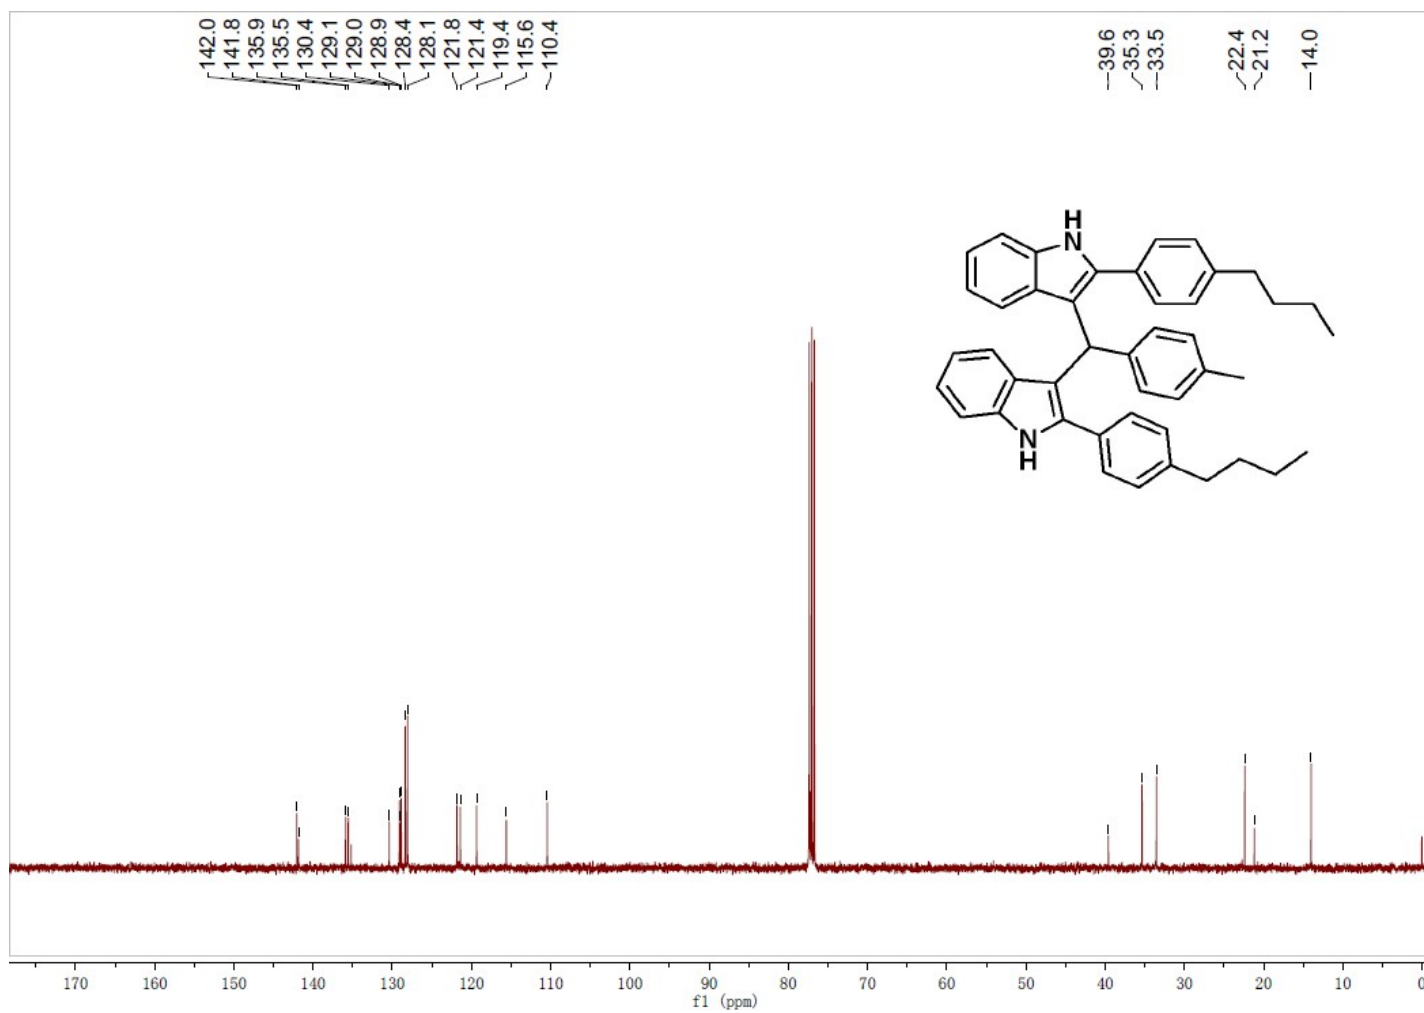

**<sup>13</sup>C NMR Spectrum of Compound 3m**

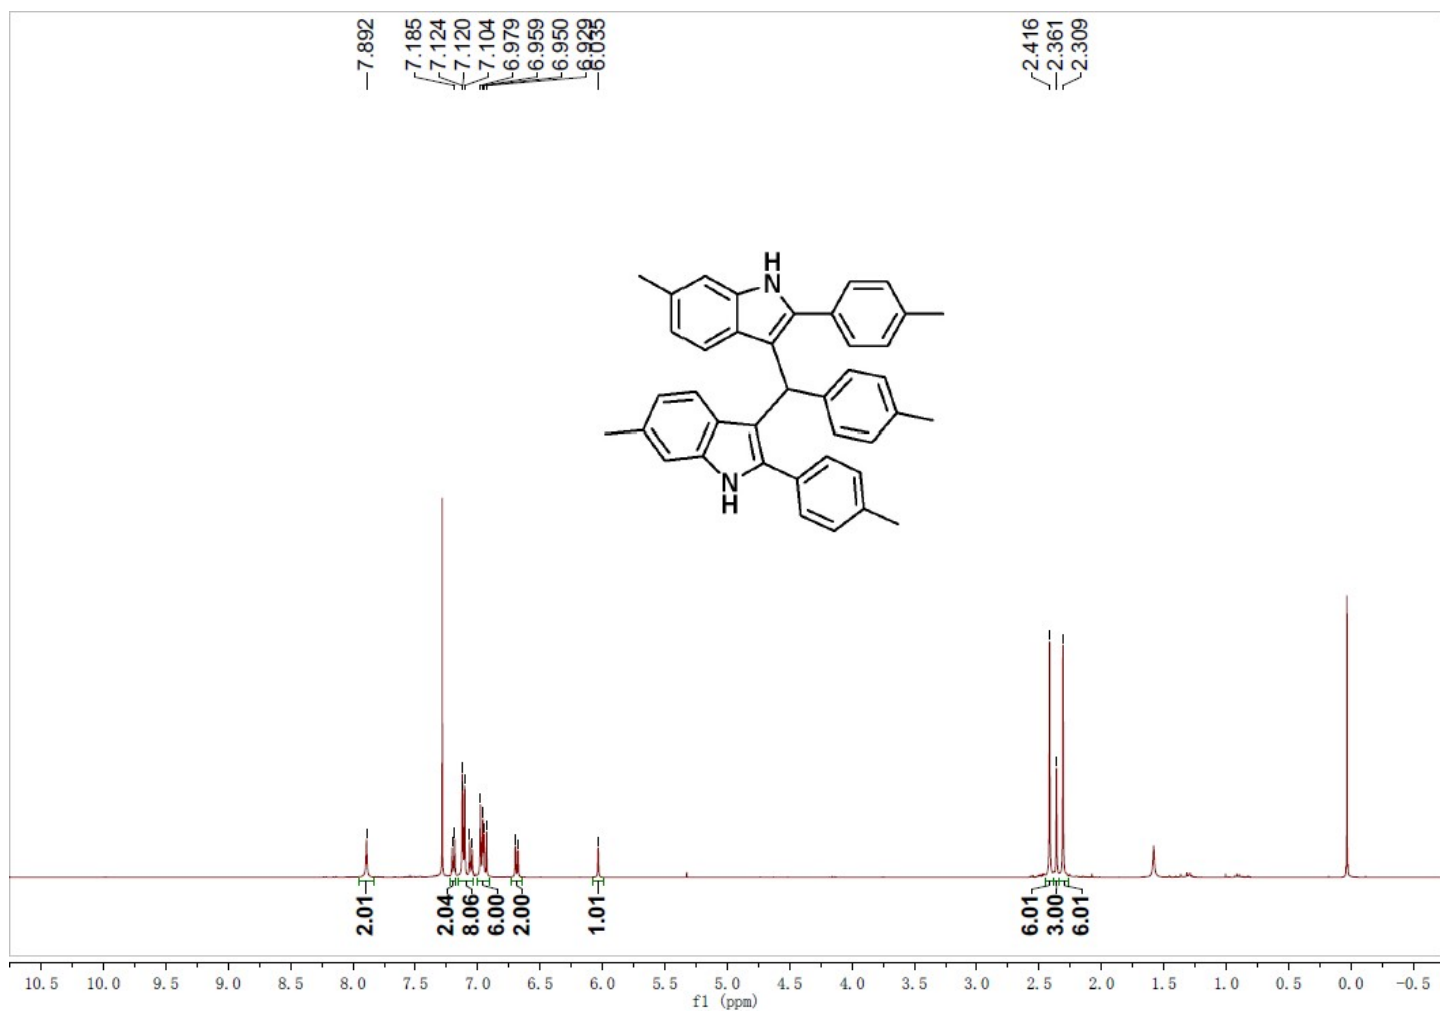

$^1\text{H}$  NMR Spectrum of Compound 3n

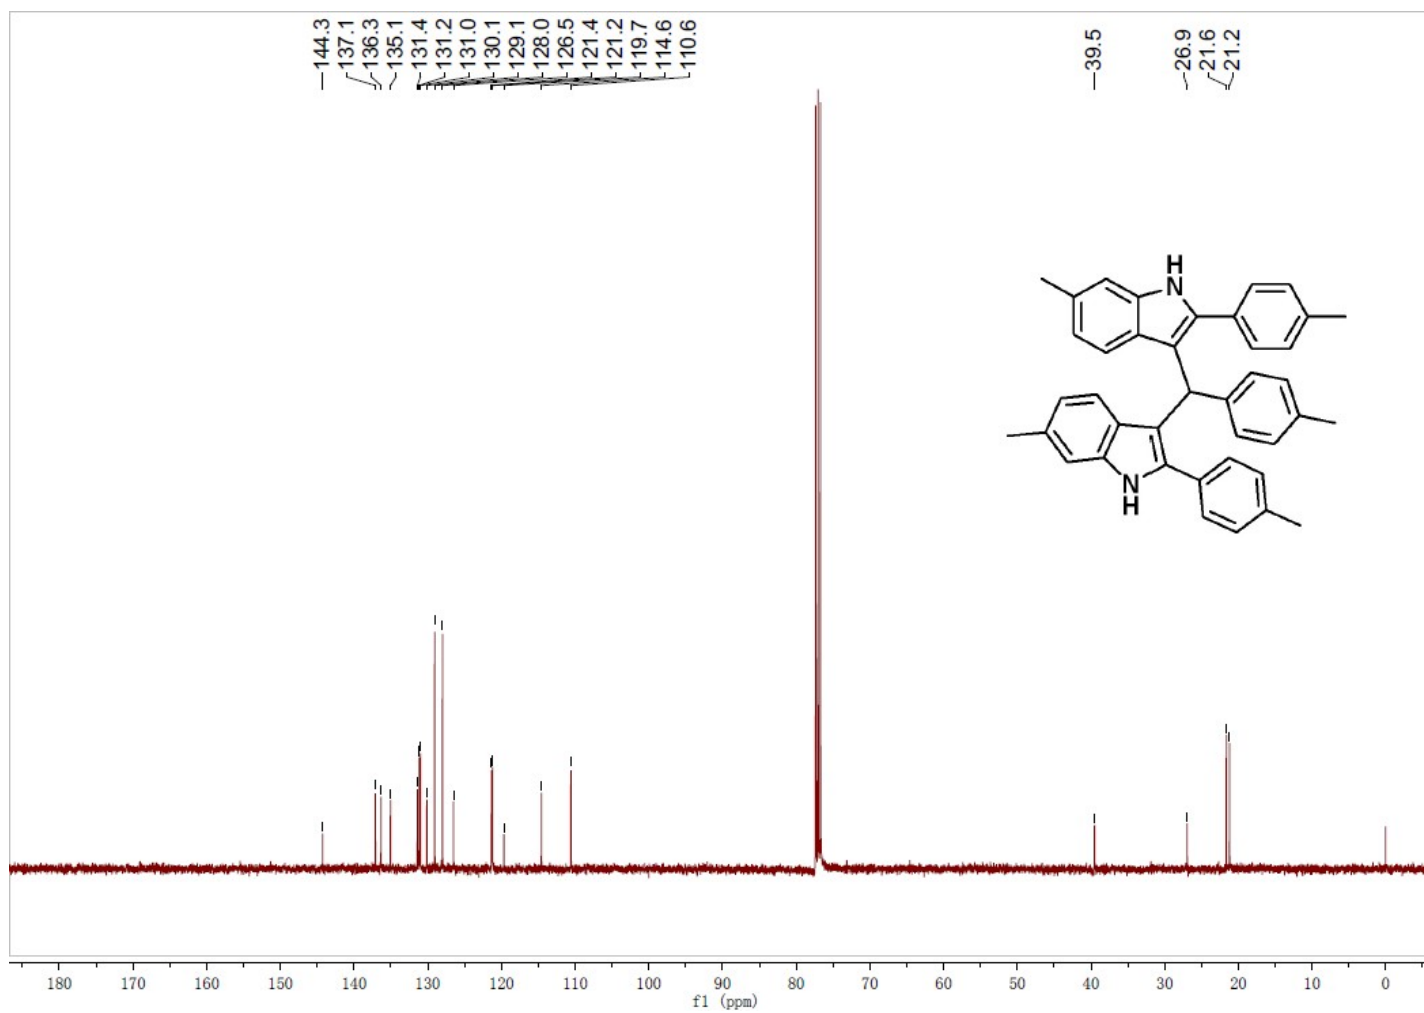

<sup>13</sup>C NMR Spectrum of Compound 3n

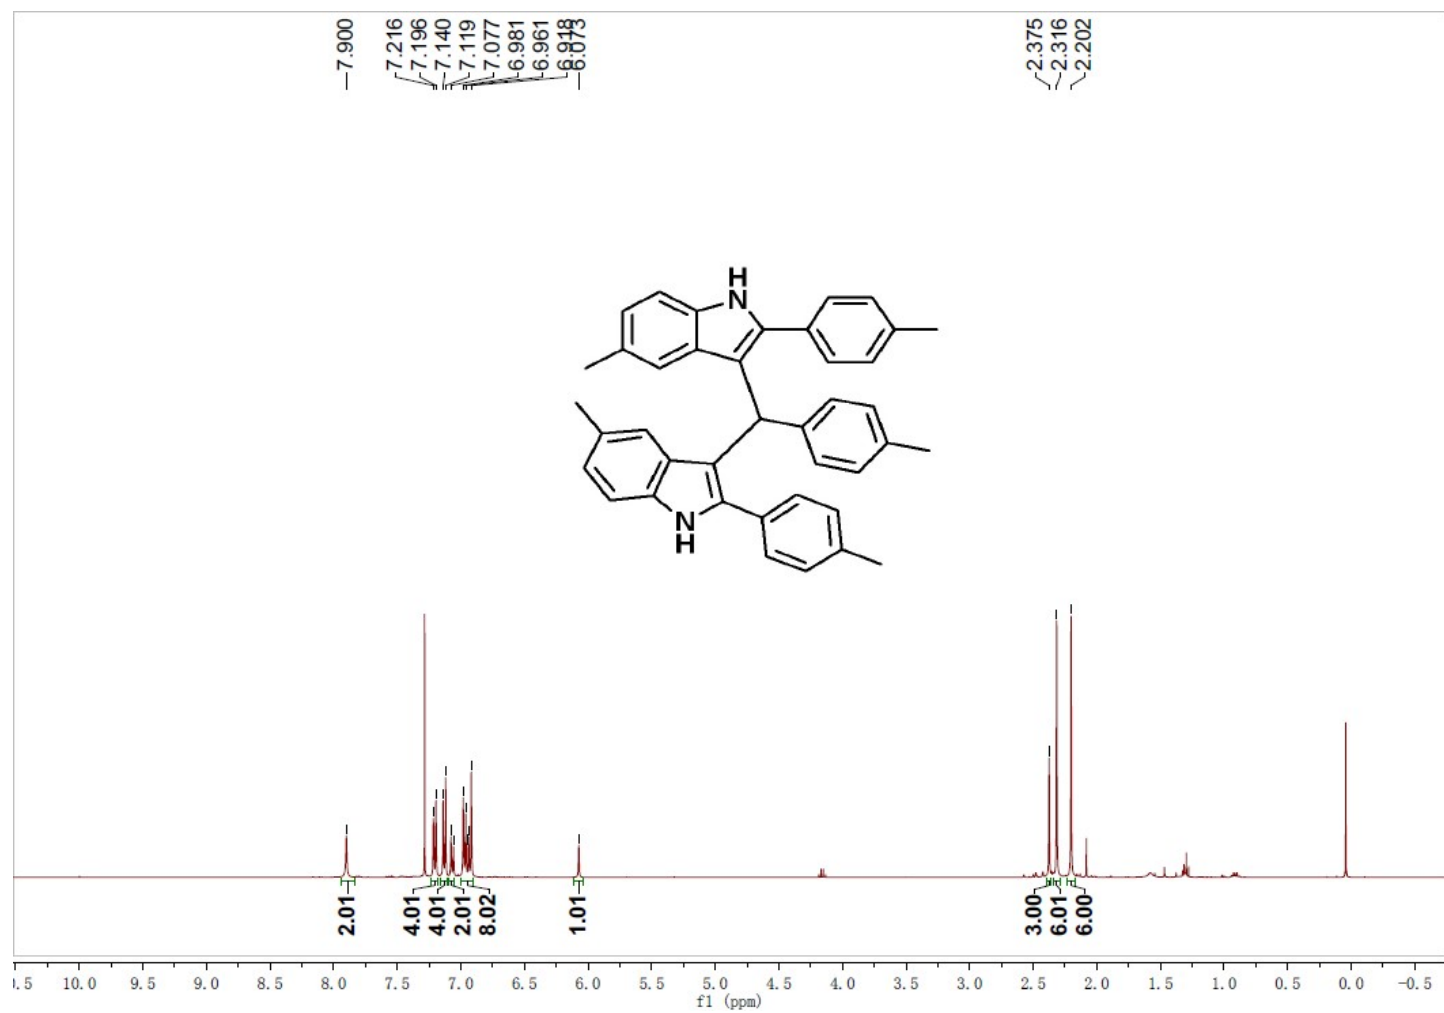

**<sup>1</sup>H NMR Spectrum of Compound 30**

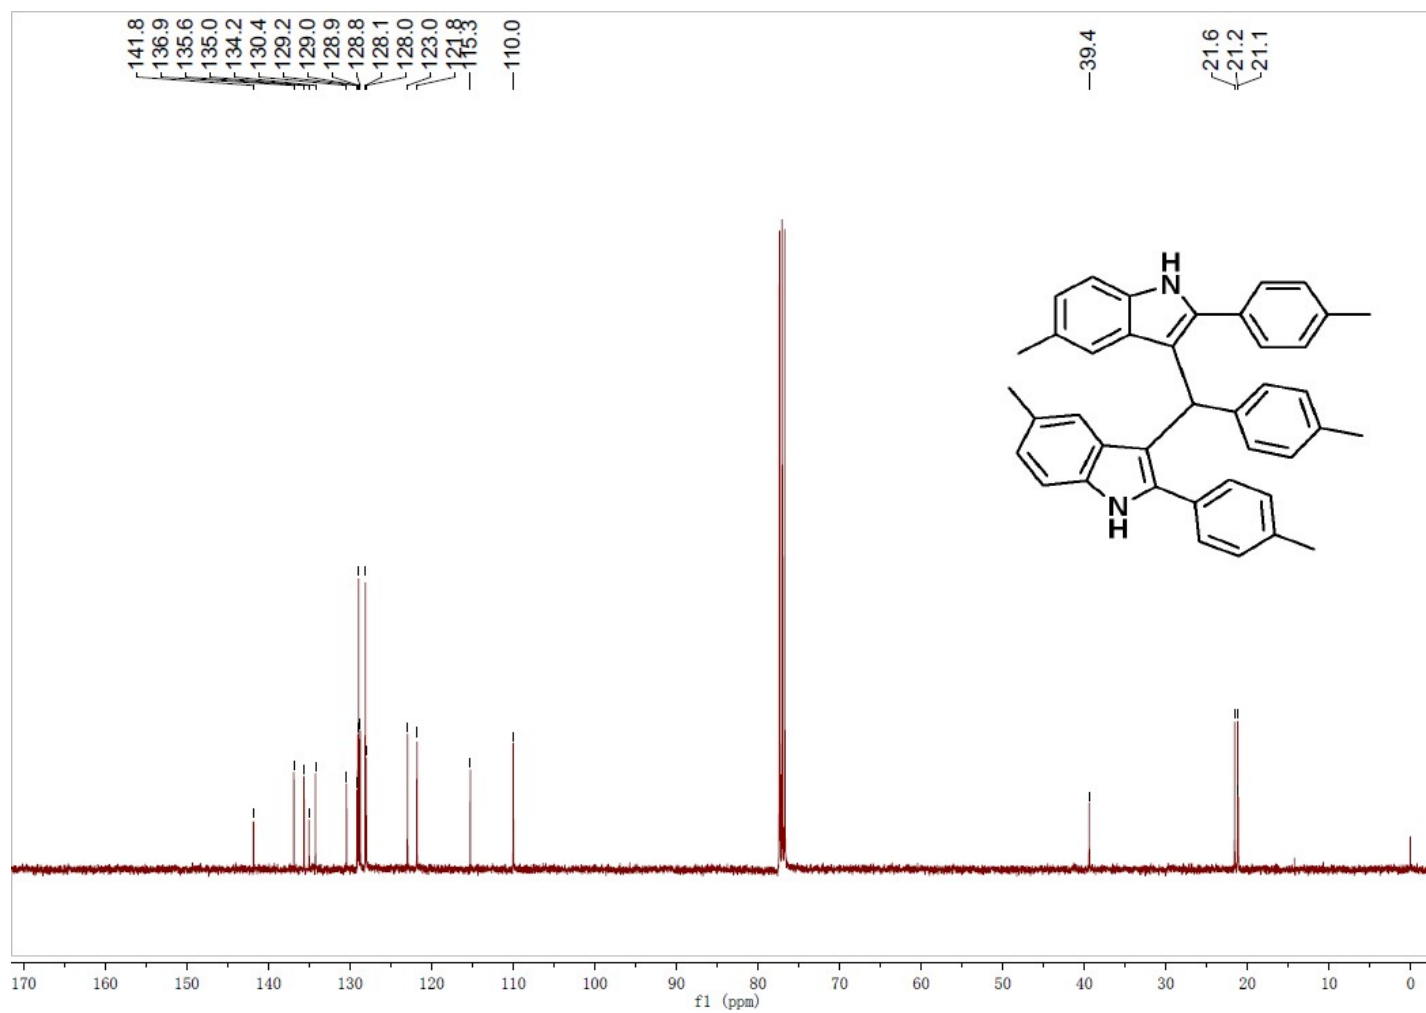

**$^{13}\text{C}$  NMR Spectrum of Compound 30**



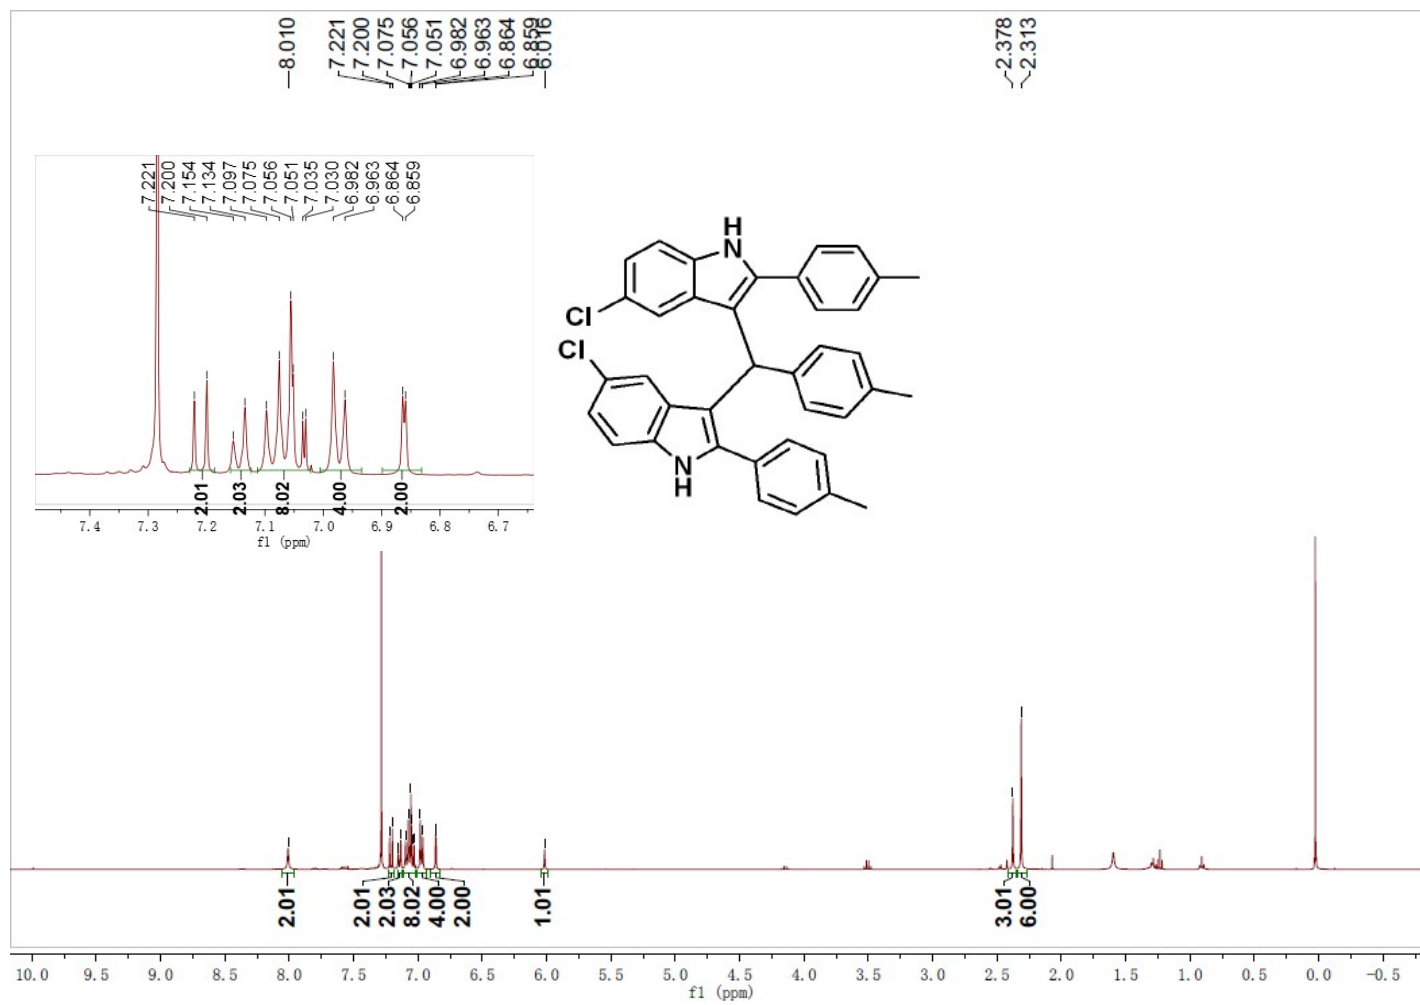

**<sup>1</sup>H NMR Spectrum of Compound 3p**

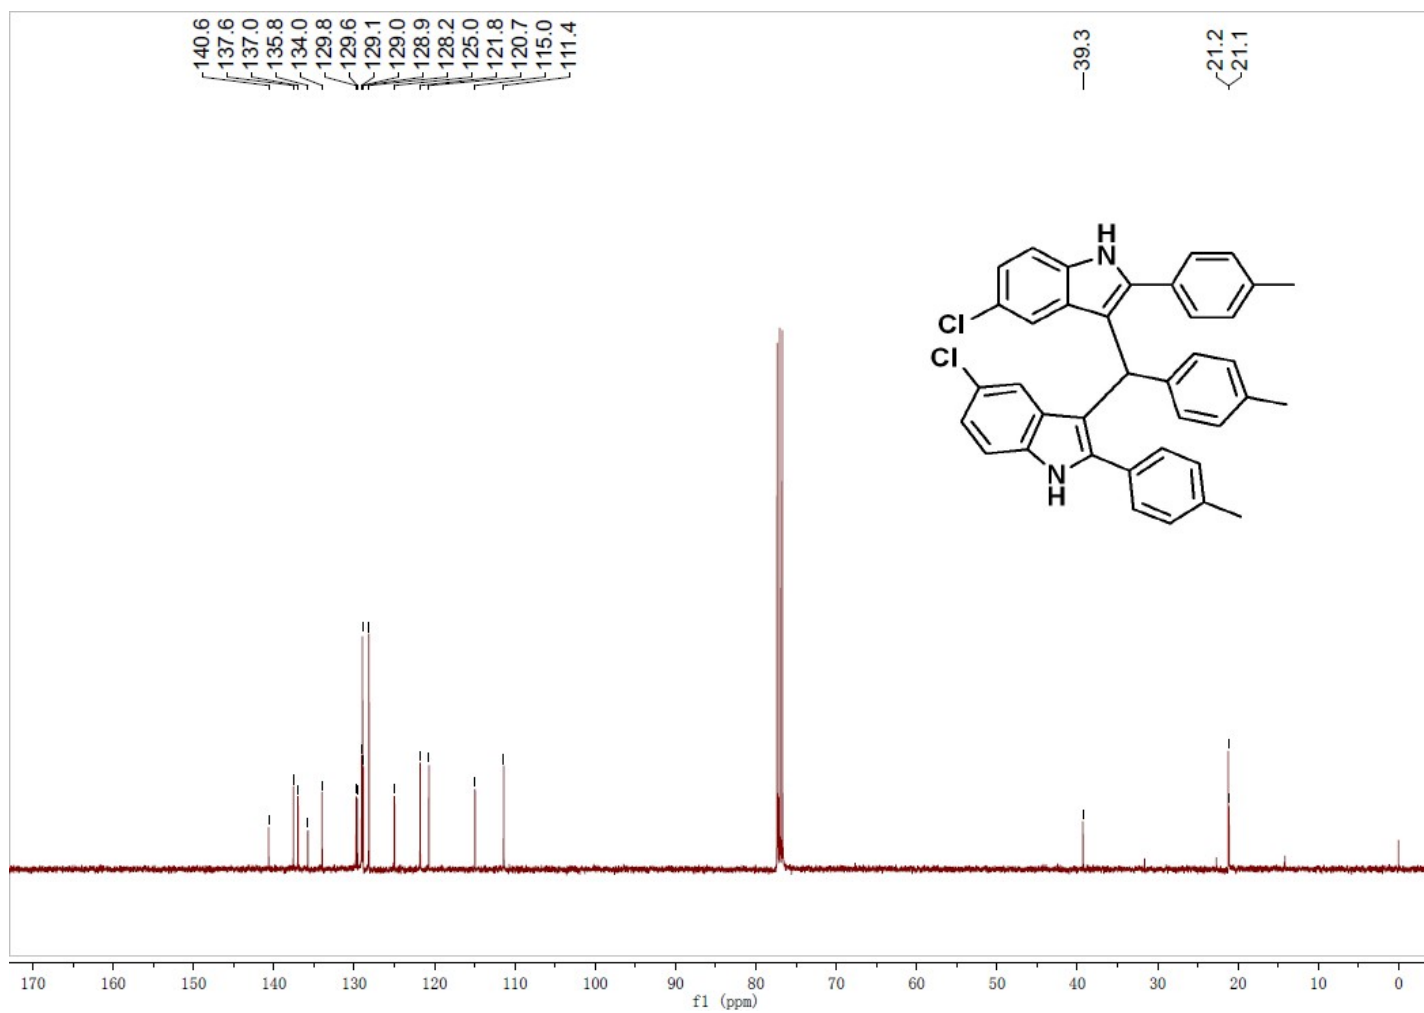

**<sup>13</sup>C NMR Spectrum of Compound 3p**

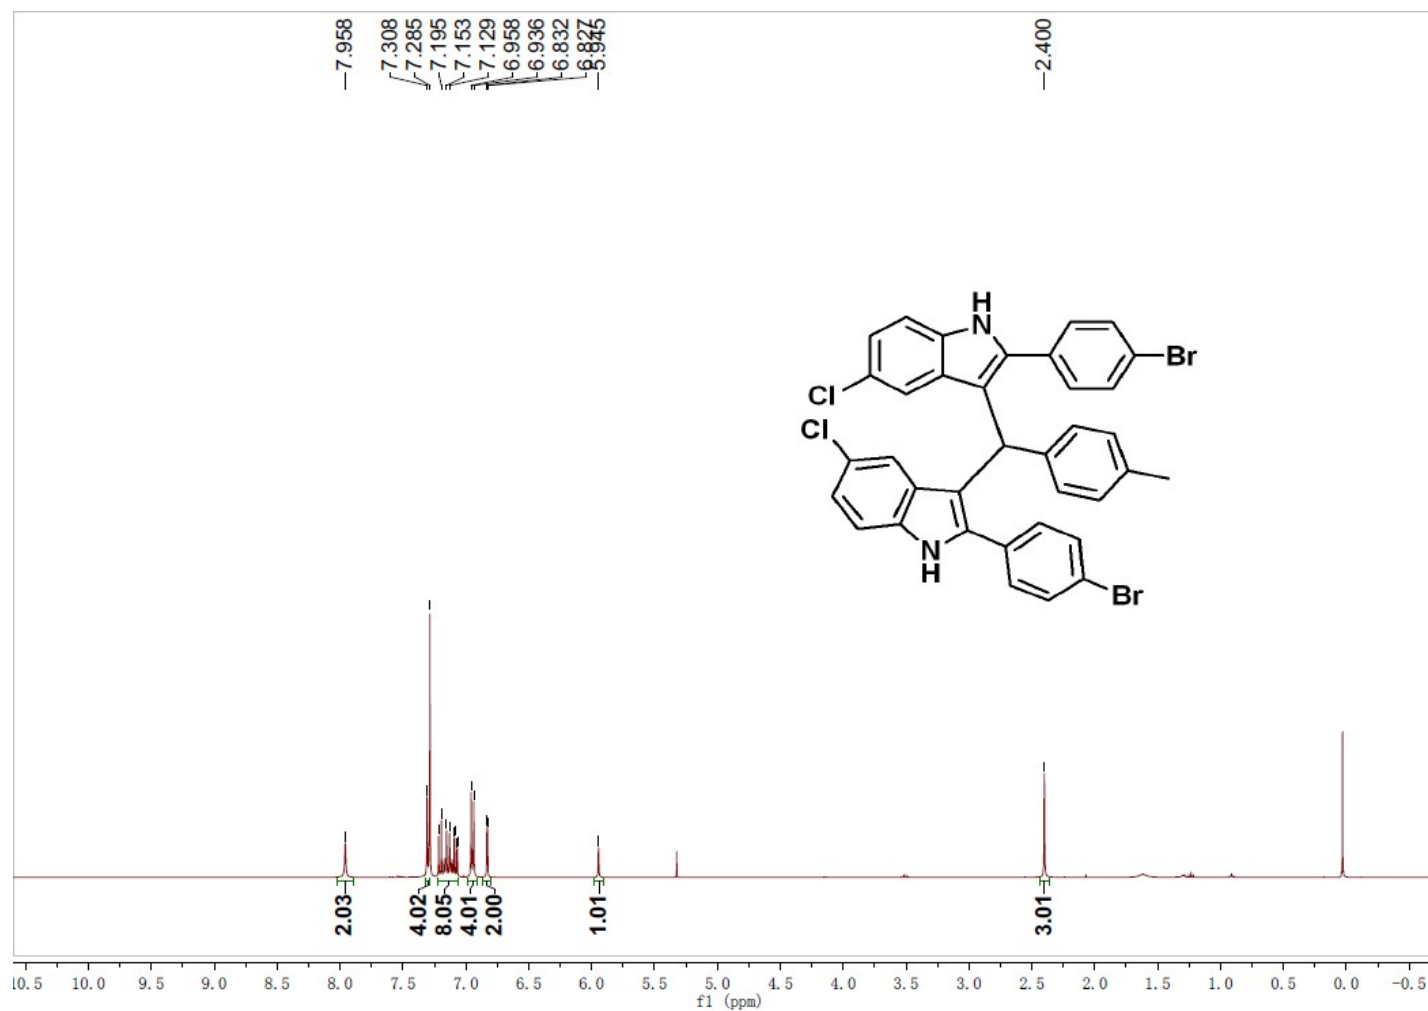

<sup>1</sup>H NMR Spectrum of Compound 3q

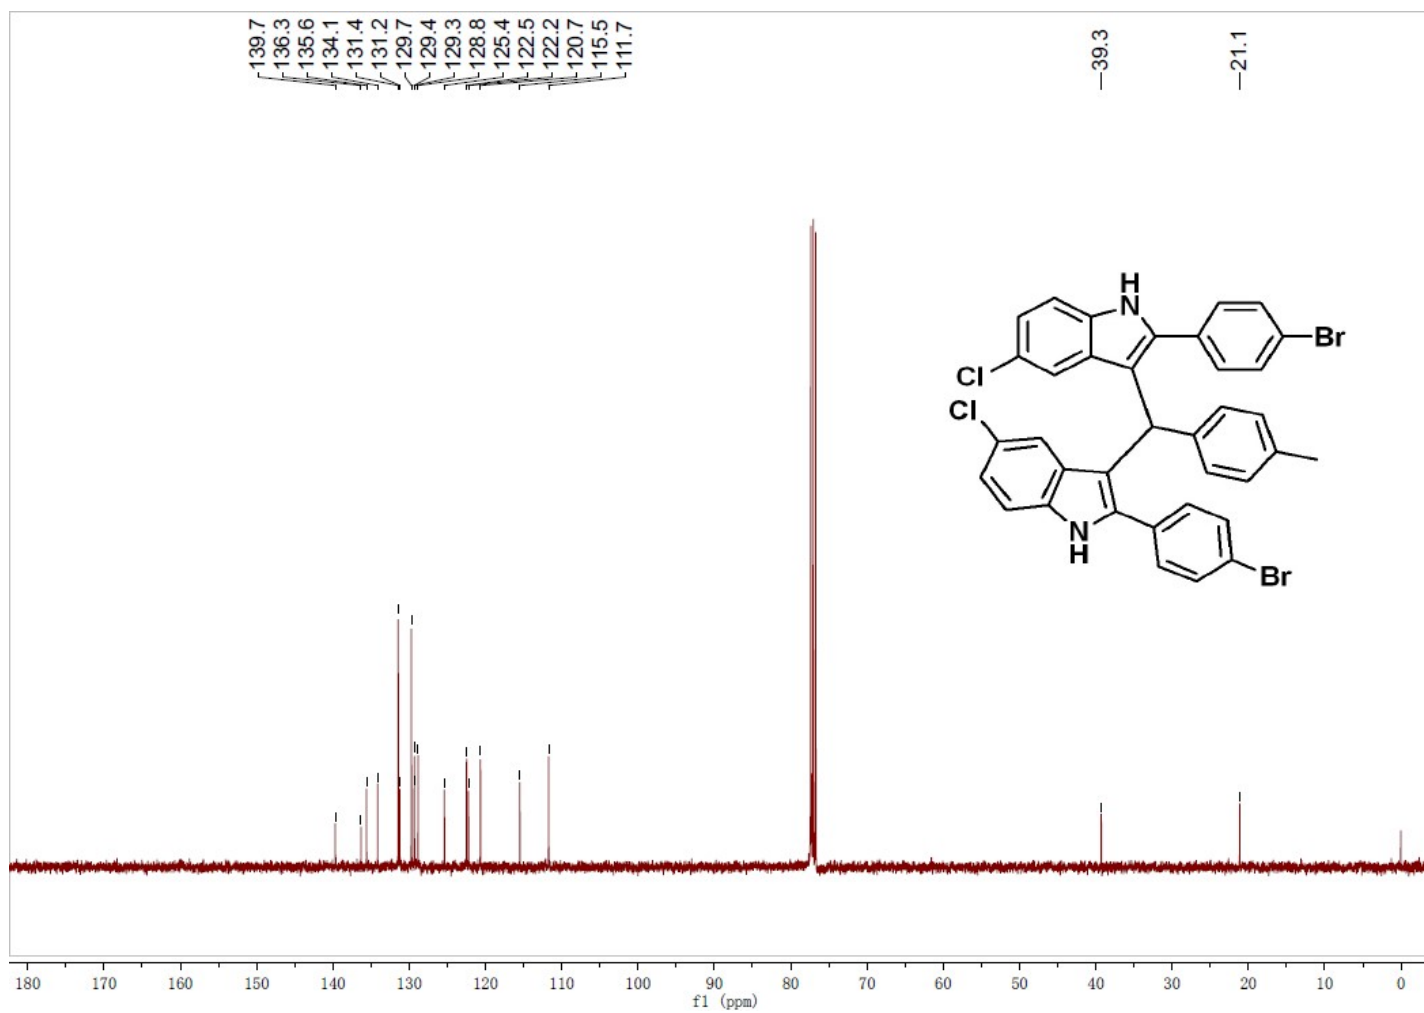

**<sup>13</sup>C NMR Spectrum of Compound 3q**

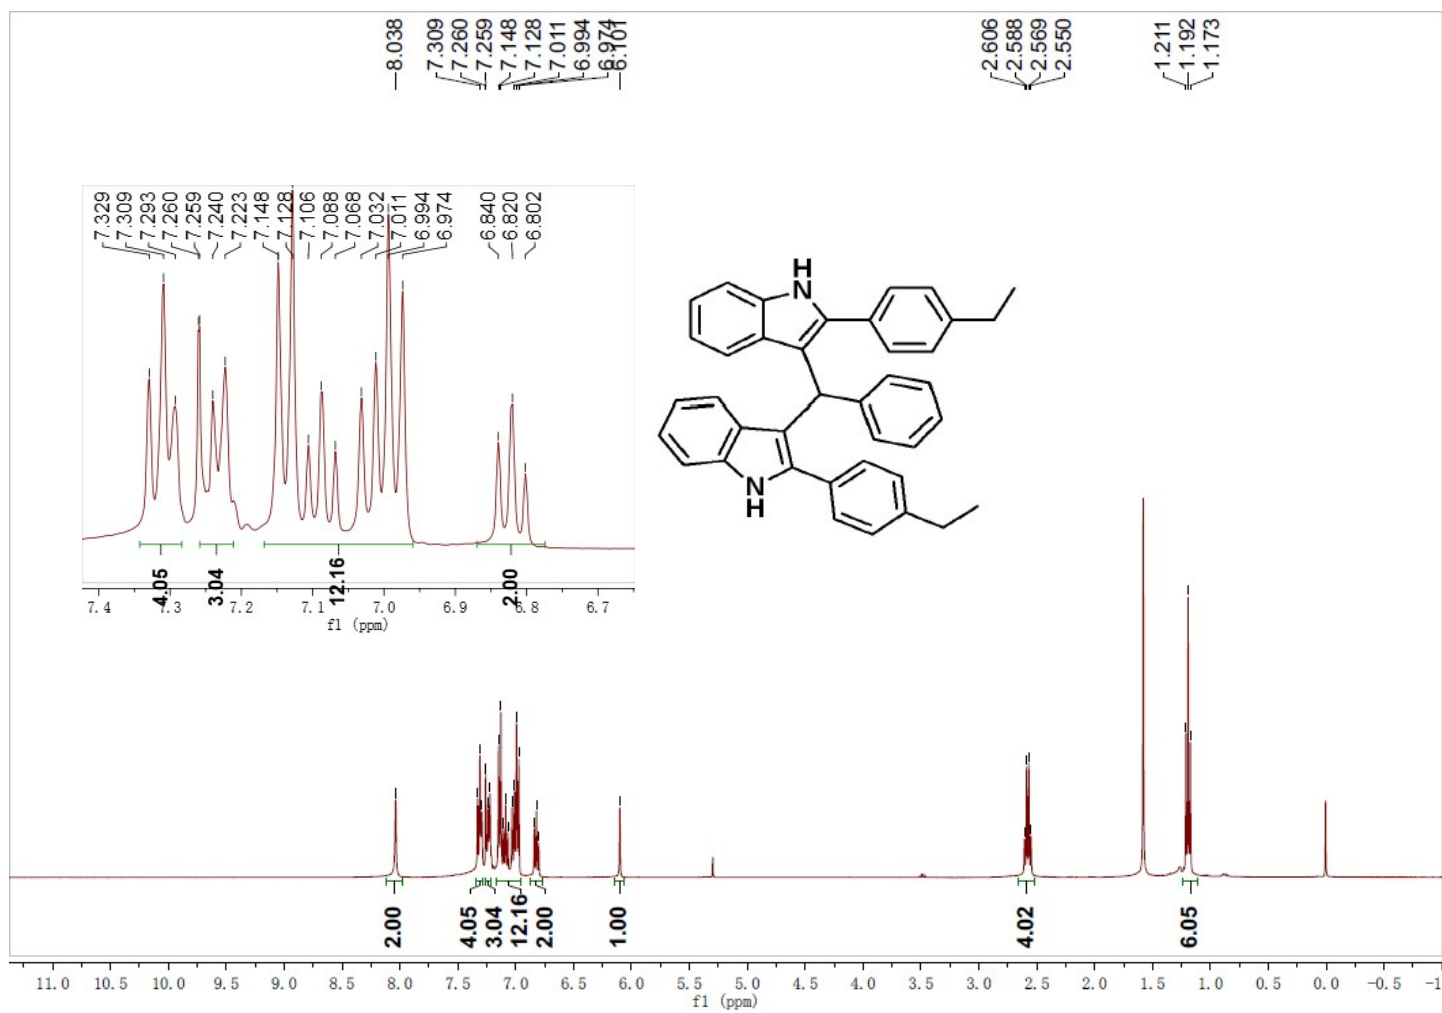

**<sup>1</sup>H NMR Spectrum of Compound 3r**

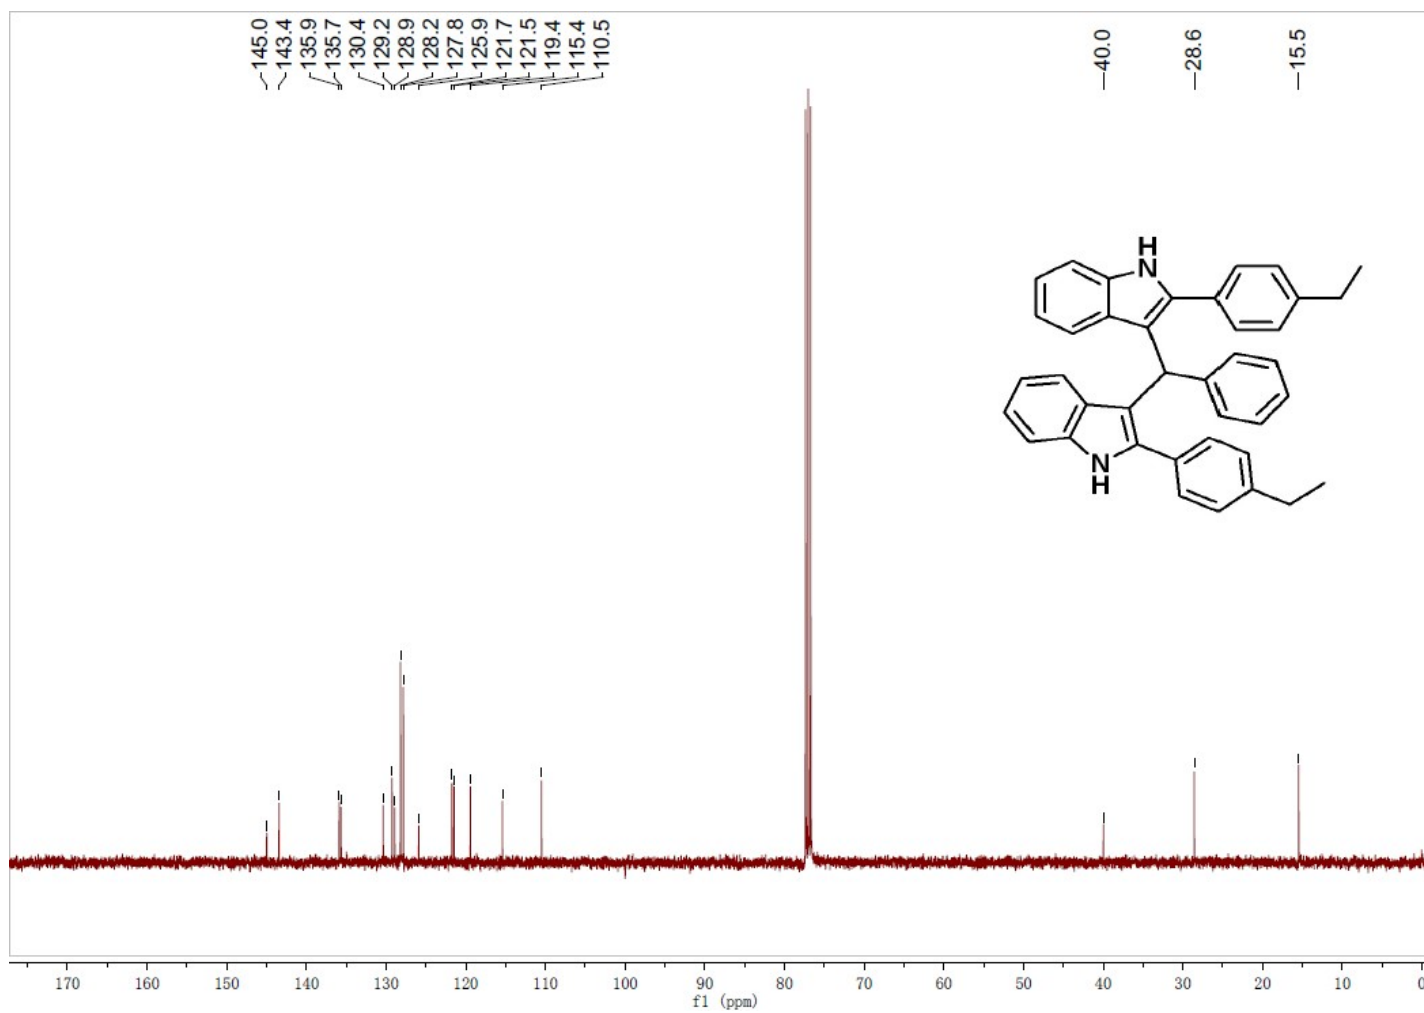

**<sup>13</sup>C NMR Spectrum of Compound 3r**

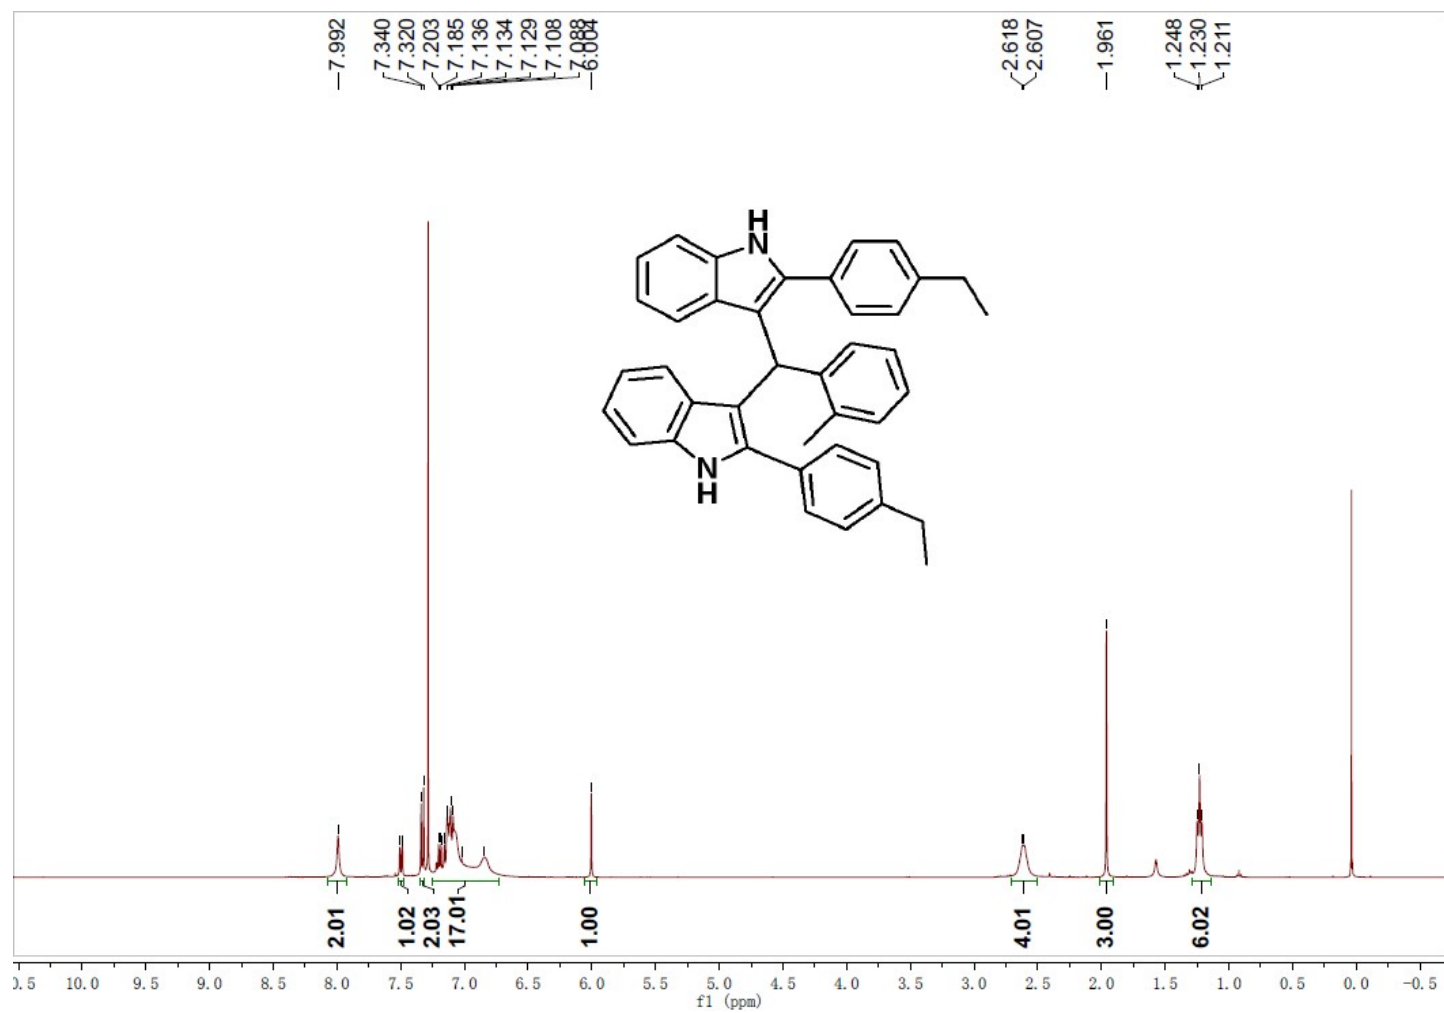

<sup>1</sup>H NMR Spectrum of Compound 3s

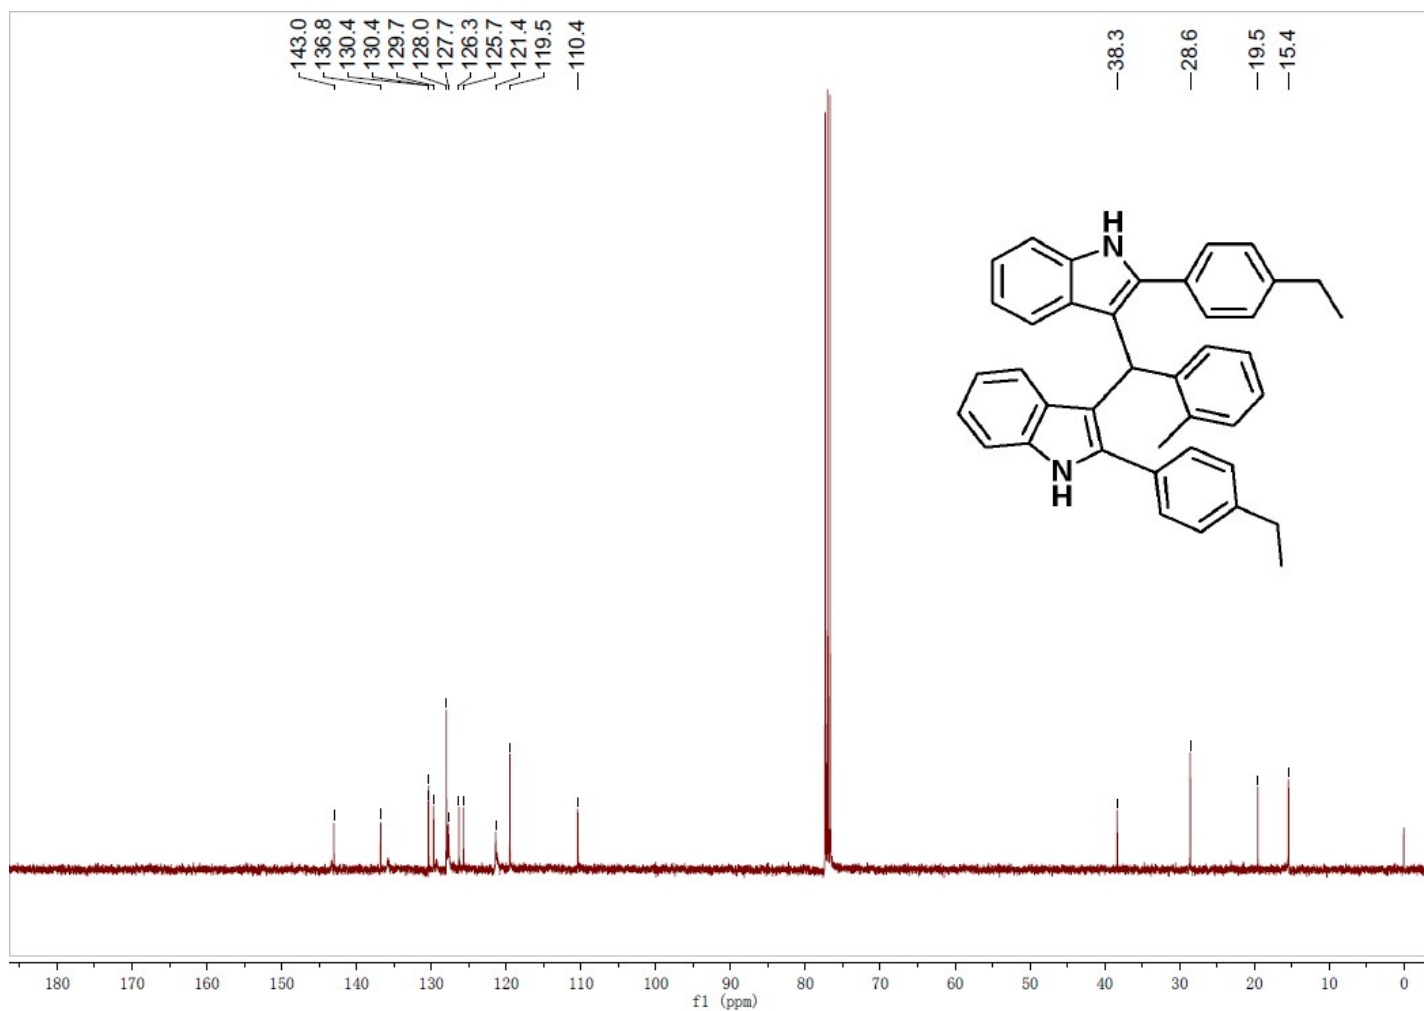

$^{13}\text{C}$  NMR Spectrum of Compound 3



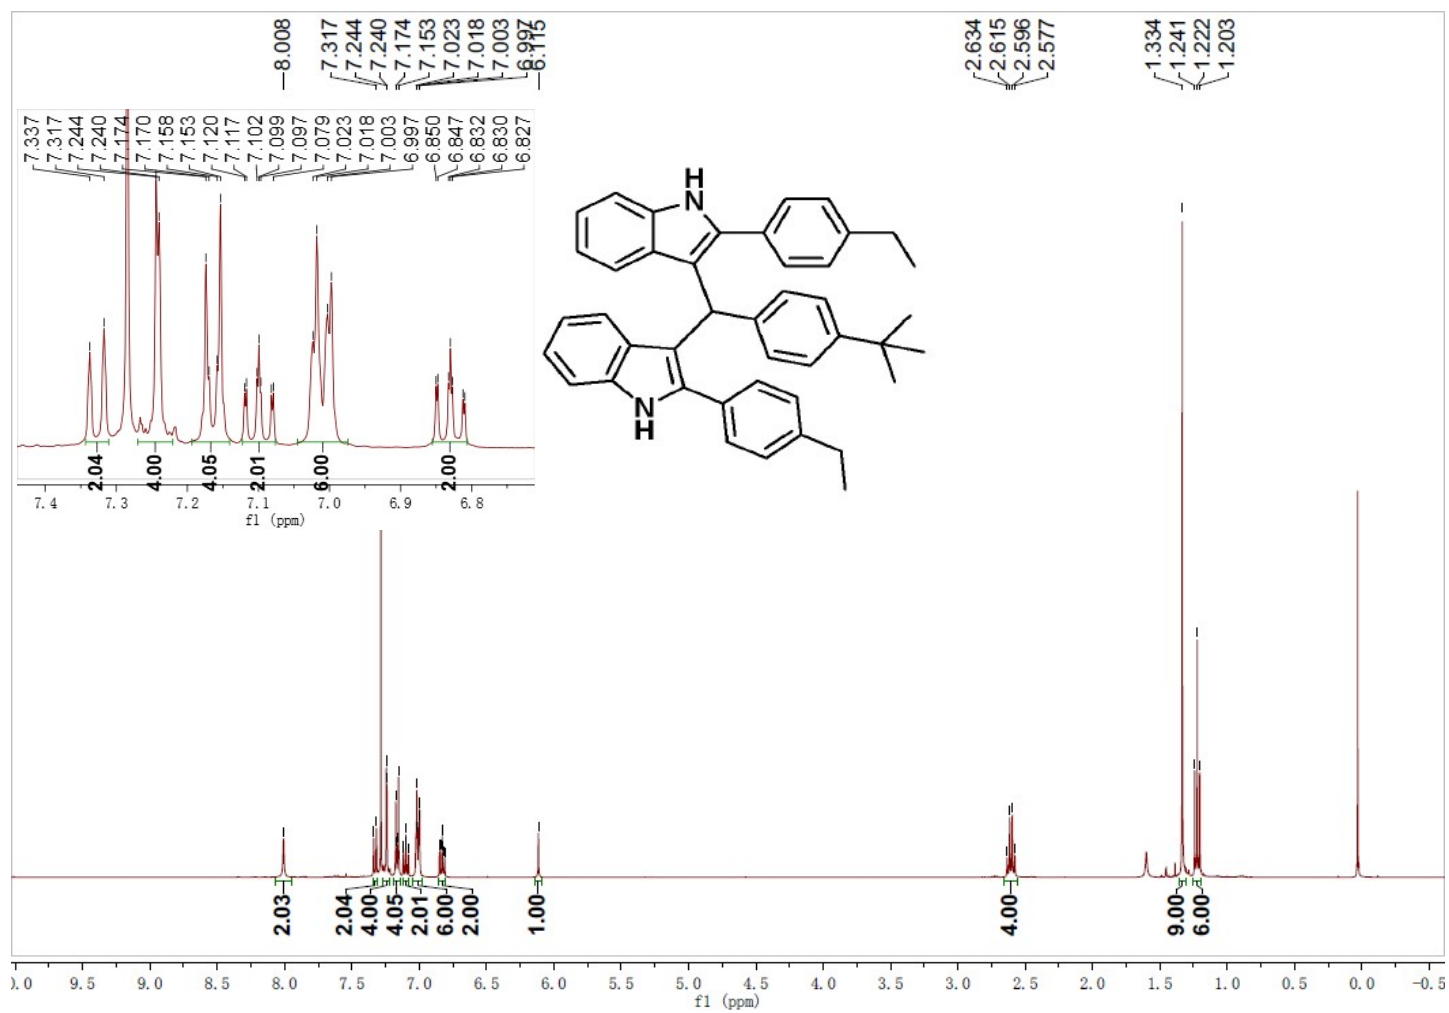

<sup>1</sup>H NMR Spectrum of Compound 3t

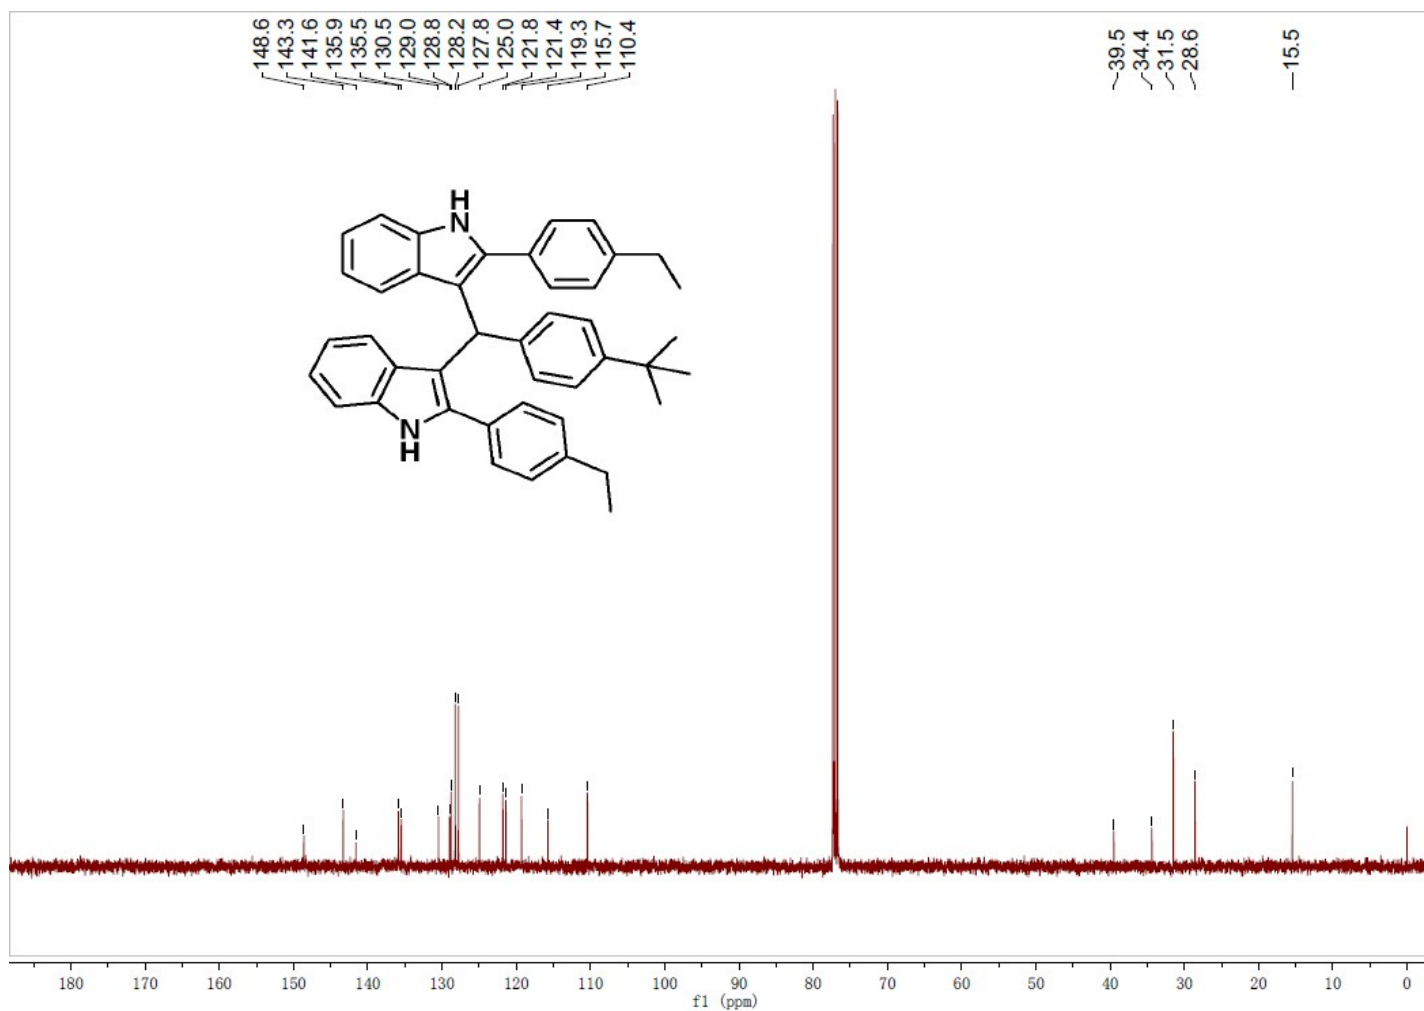

<sup>13</sup>C NMR Spectrum of Compound 3t

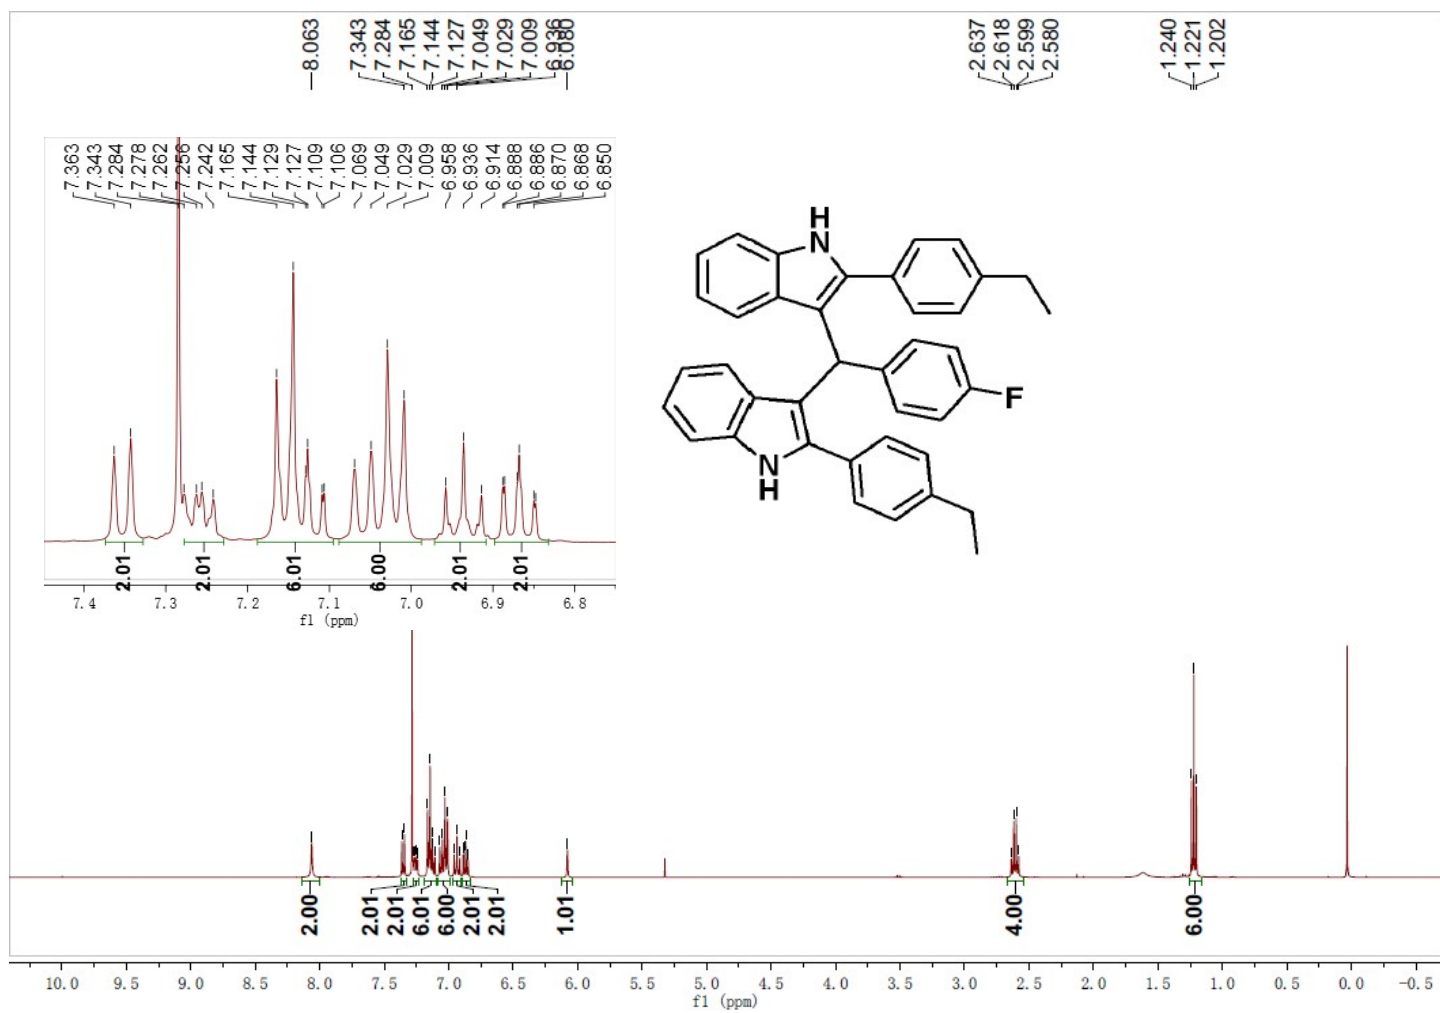

<sup>1</sup>H NMR Spectrum of Compound 3u

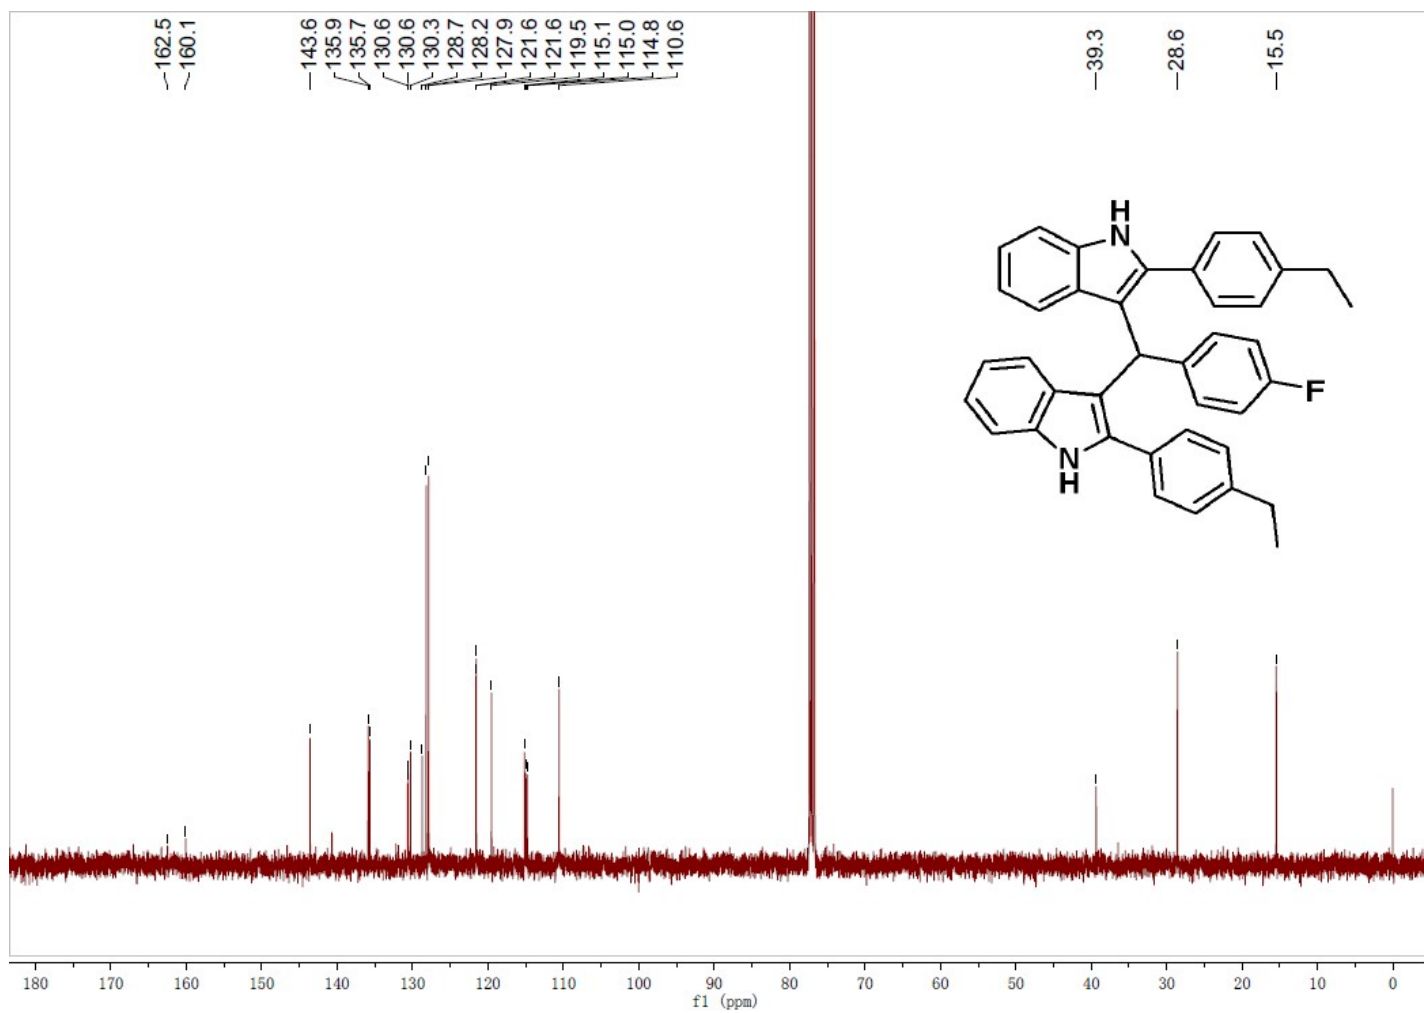

$^{13}\text{C}$  NMR Spectrum of Compound 3u

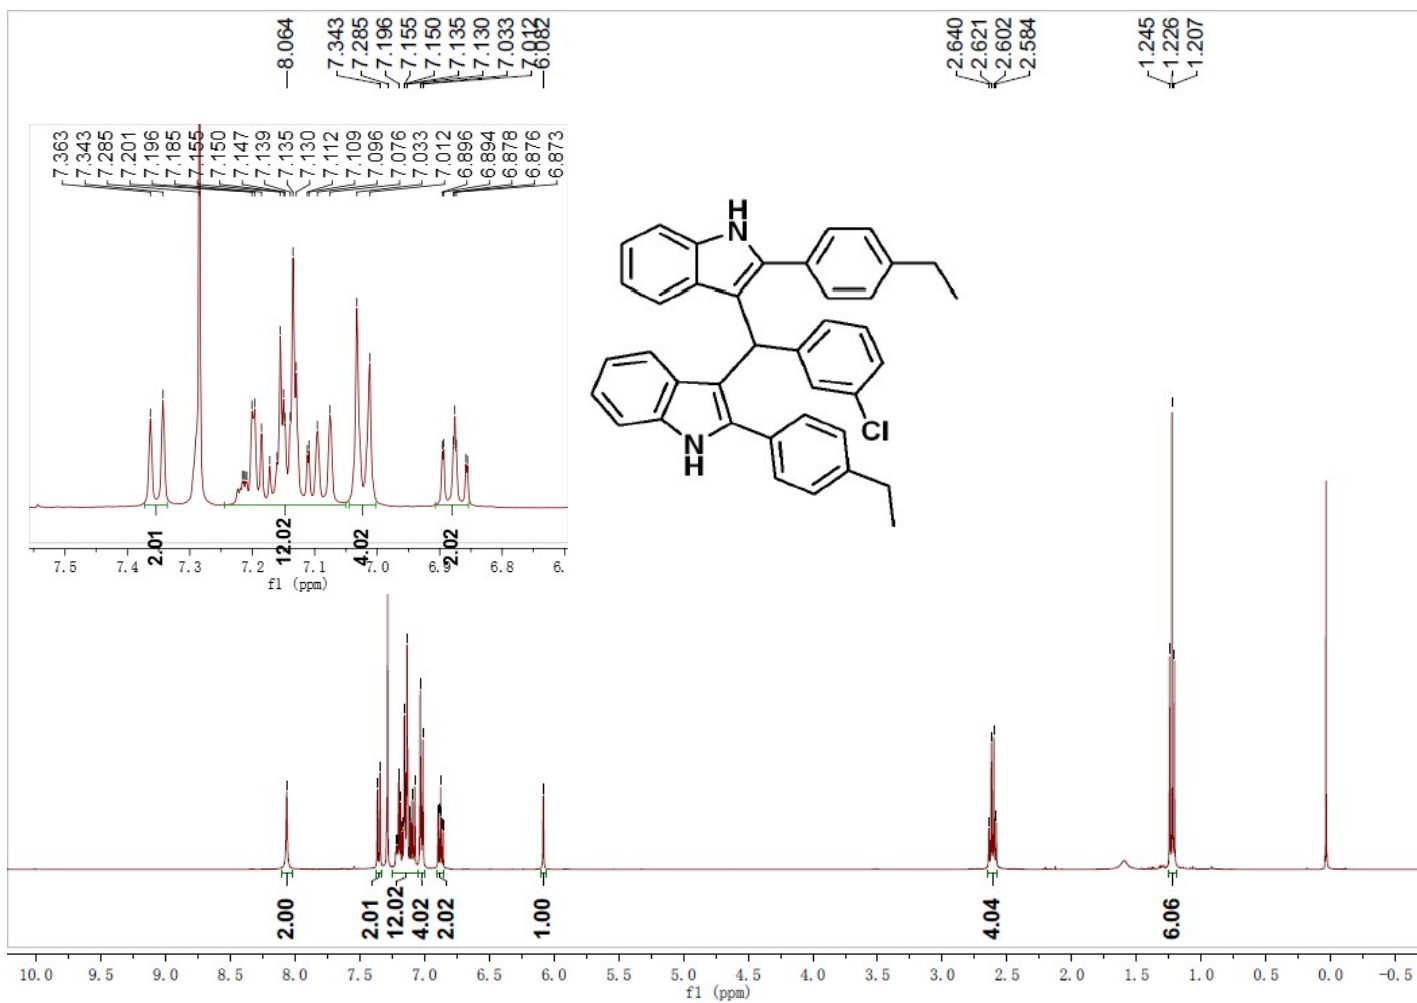

**<sup>1</sup>H NMR Spectrum of Compound 3v**

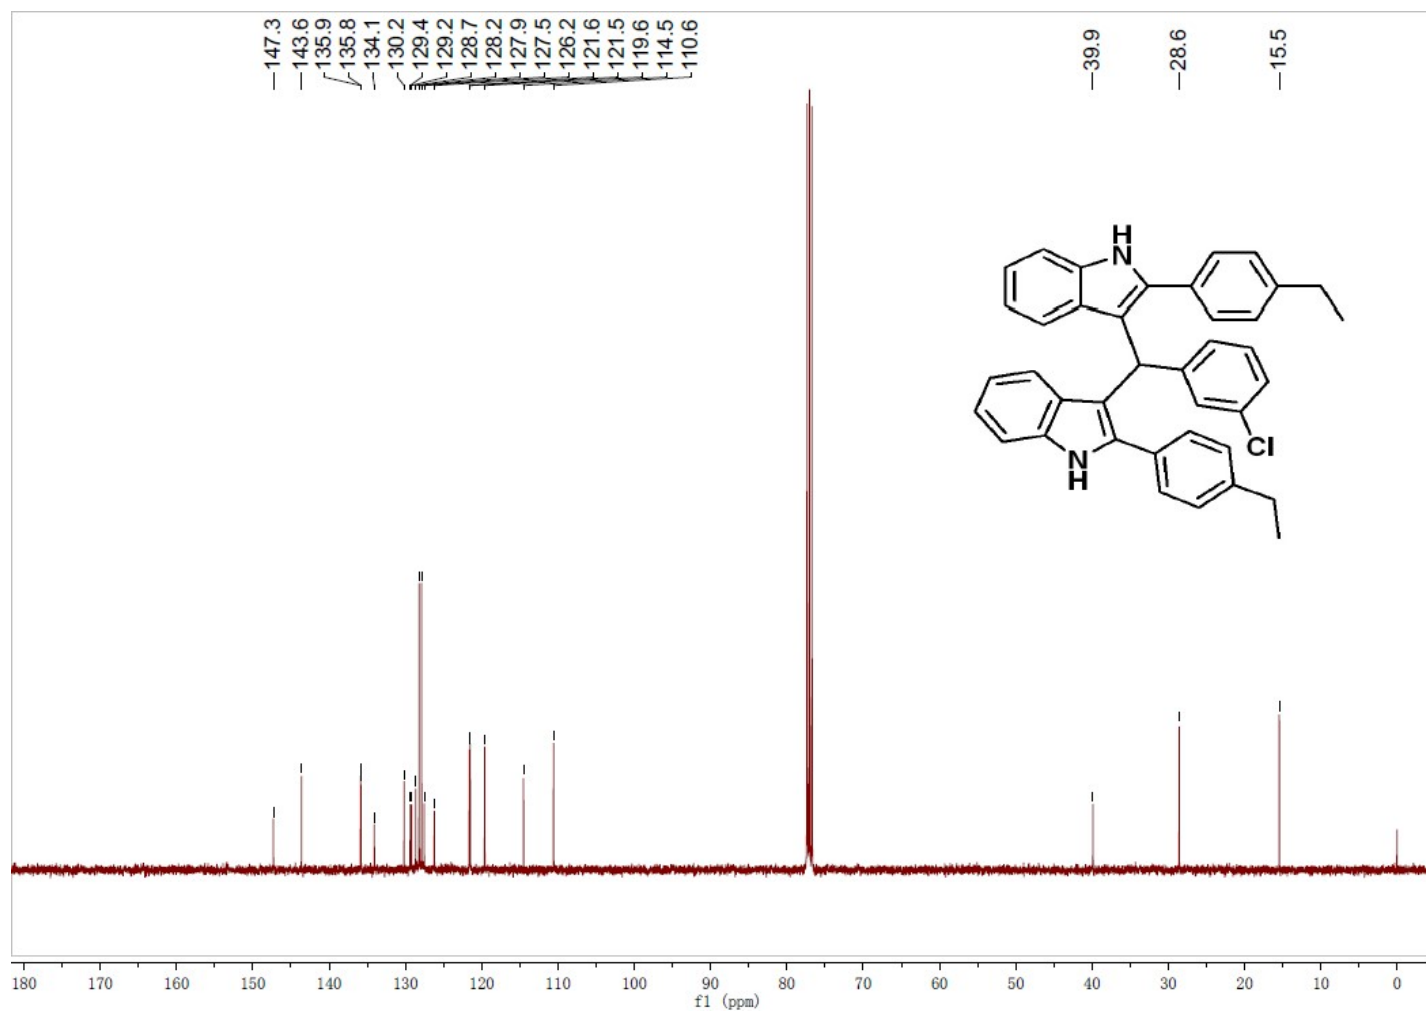

**<sup>13</sup>C NMR Spectrum of Compound 3v**

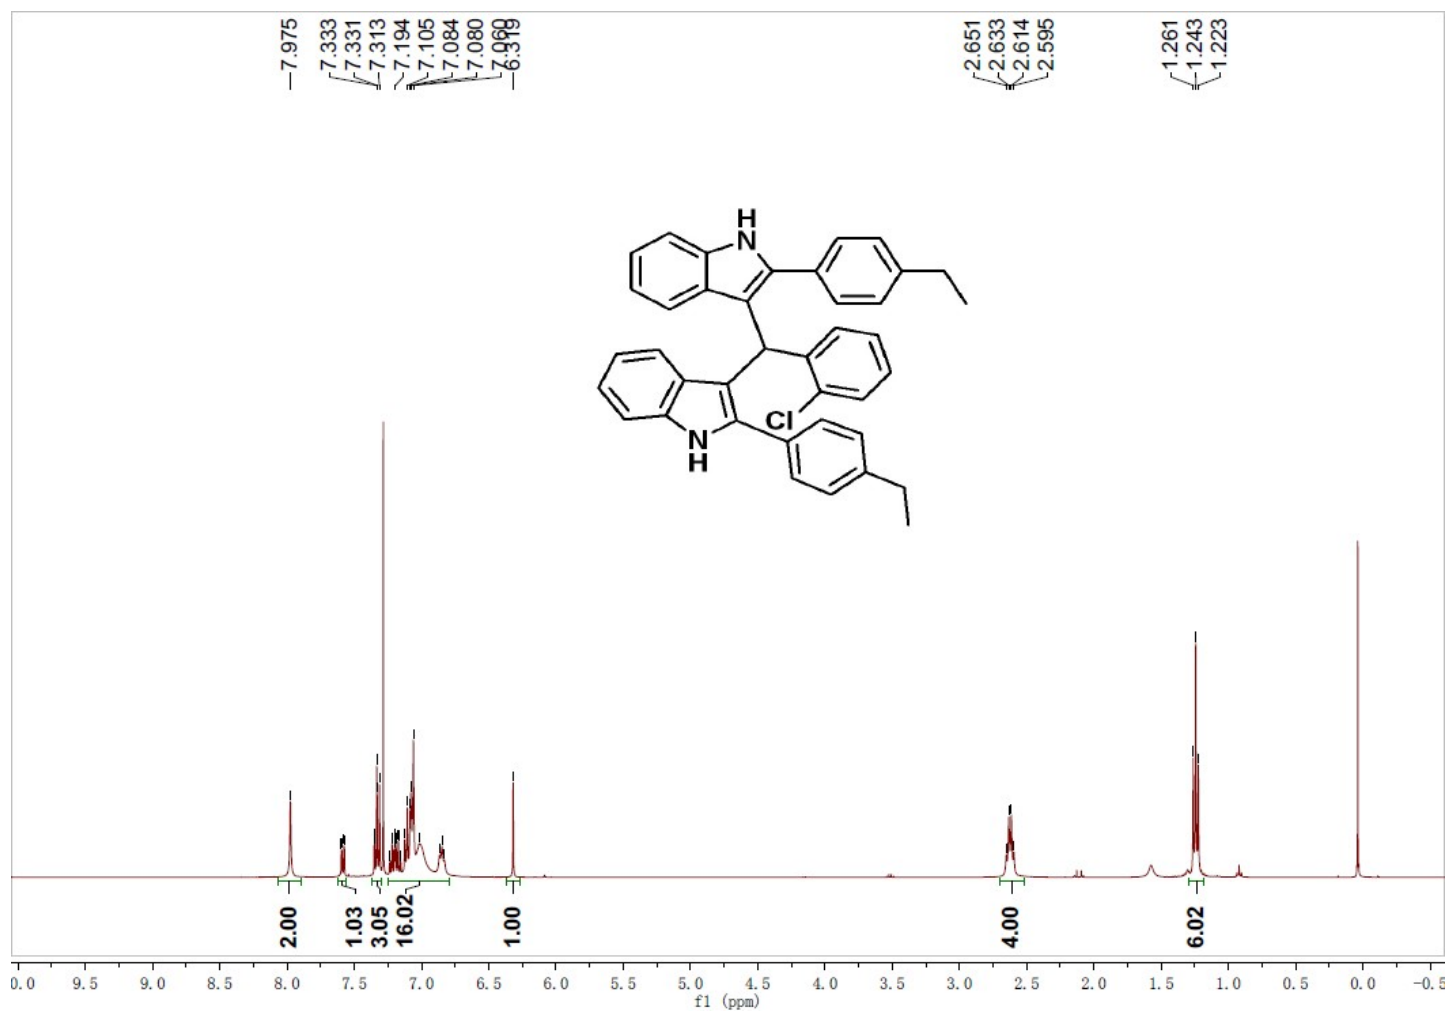

<sup>1</sup>H NMR Spectrum of Compound 3w

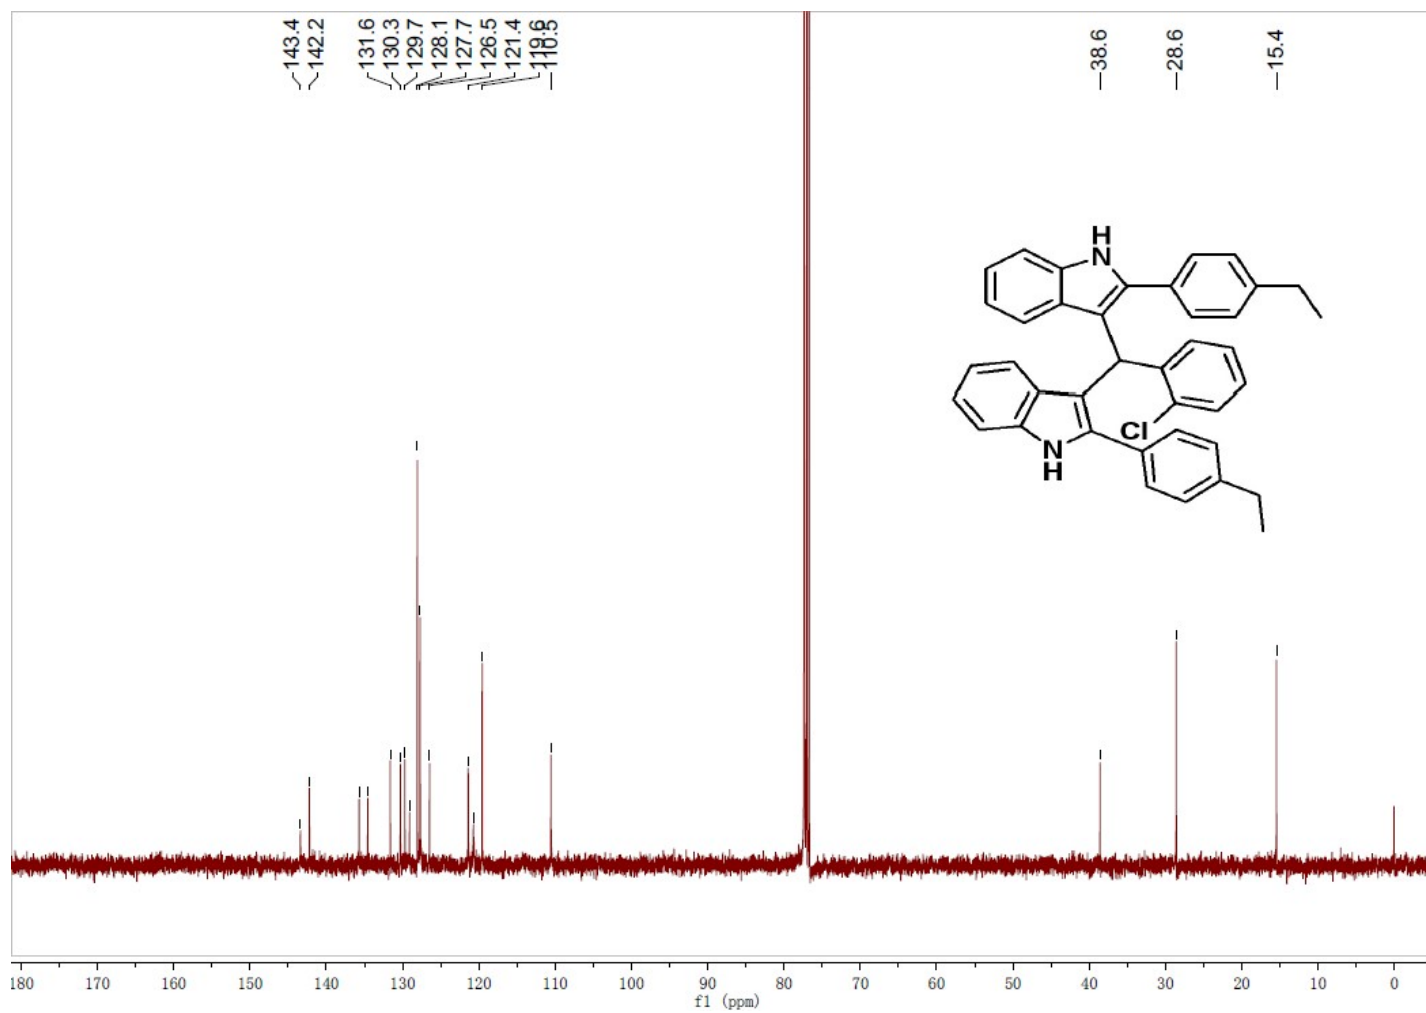

**<sup>13</sup>C NMR Spectrum of Compound 3w**



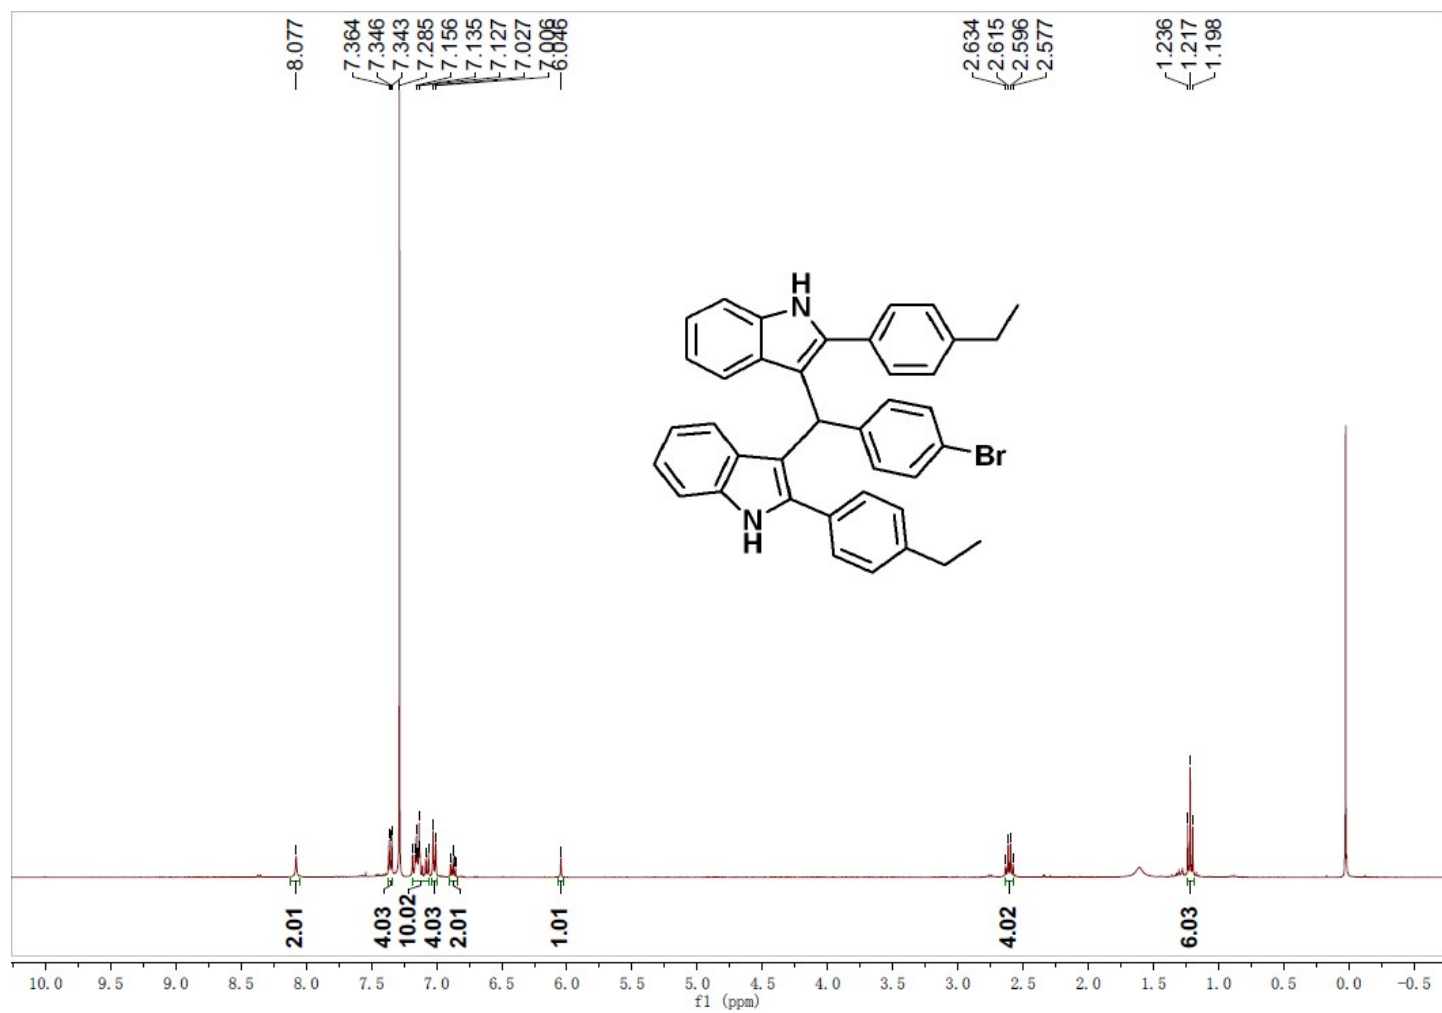

**<sup>1</sup>H NMR Spectrum of Compound 3x**

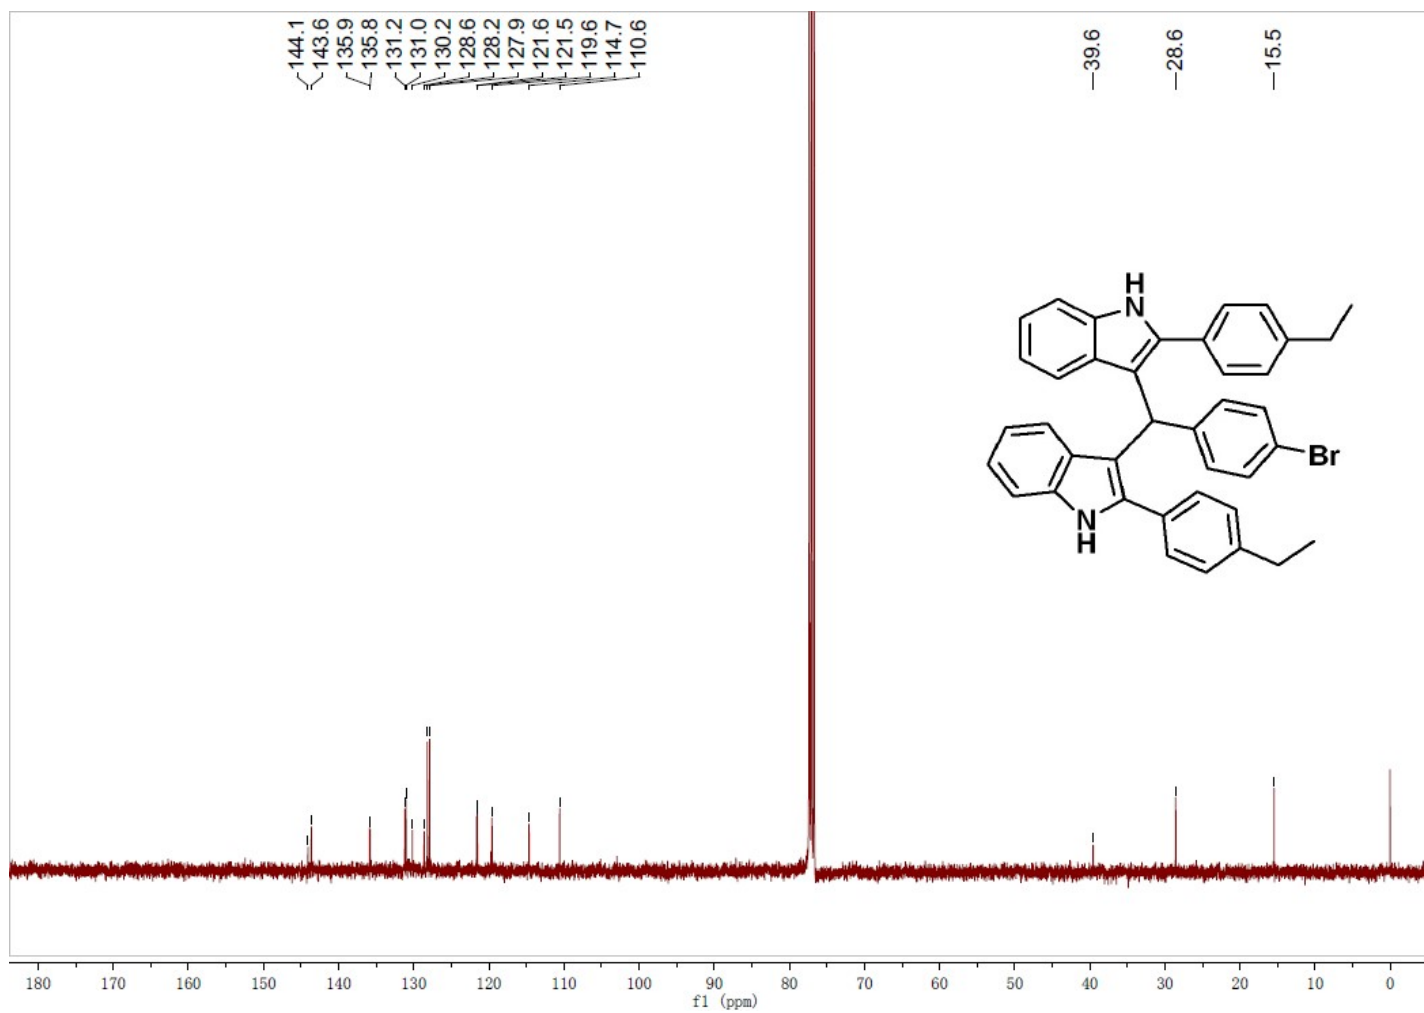

**$^{13}\text{C}$  NMR Spectrum of Compound 3x**

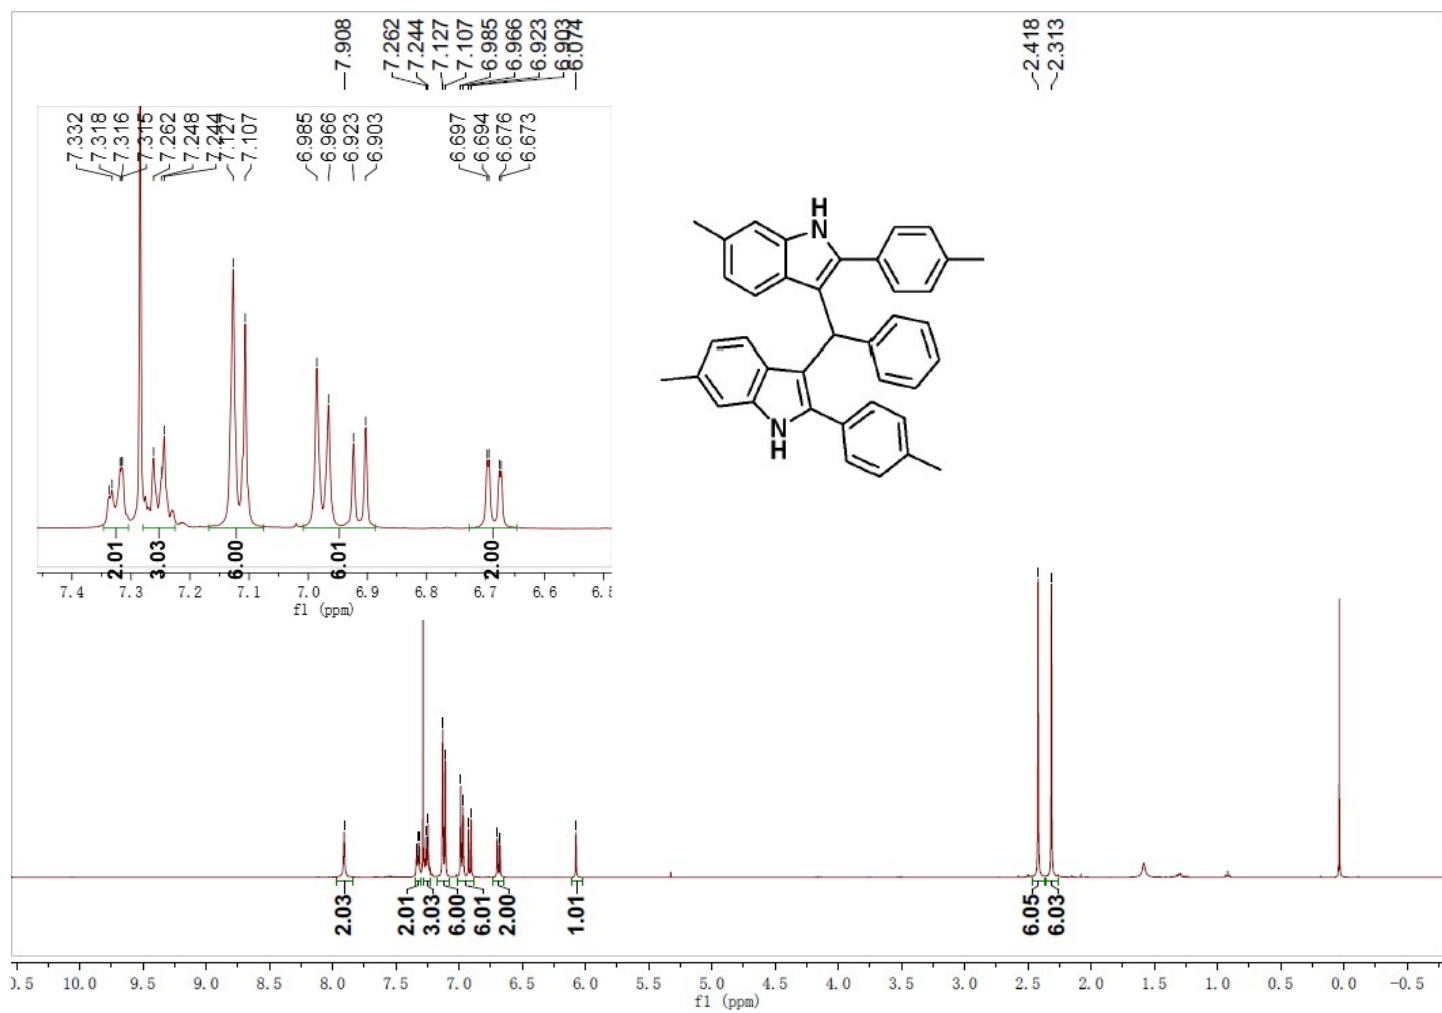

**<sup>1</sup>H NMR Spectrum of Compound 3y**

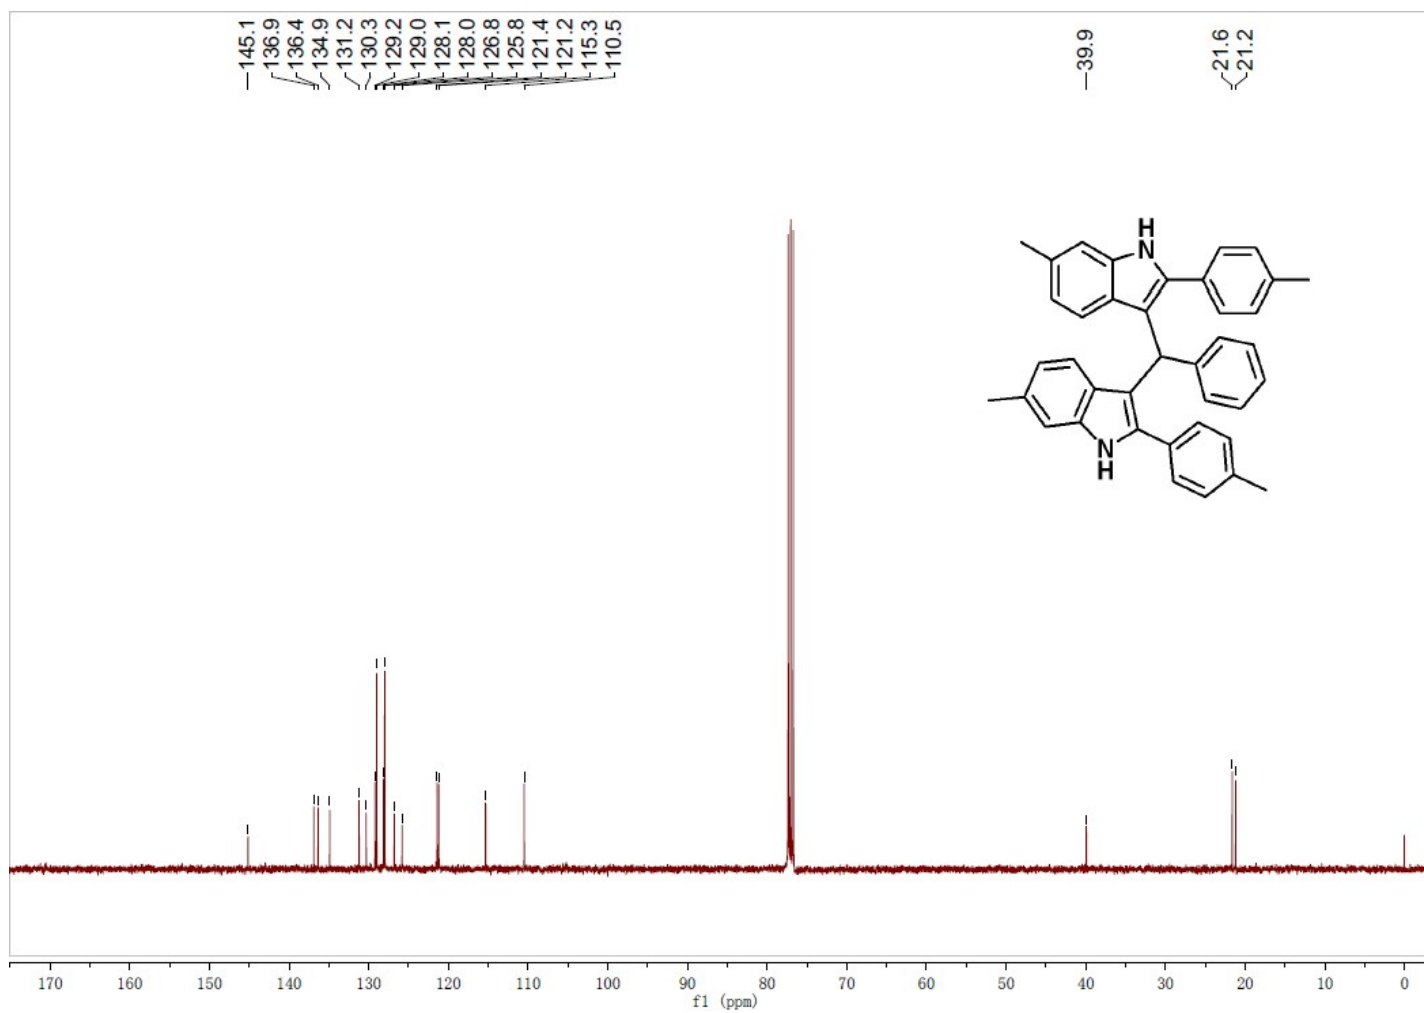

$^{13}\text{C}$  NMR Spectrum of Compound 3y



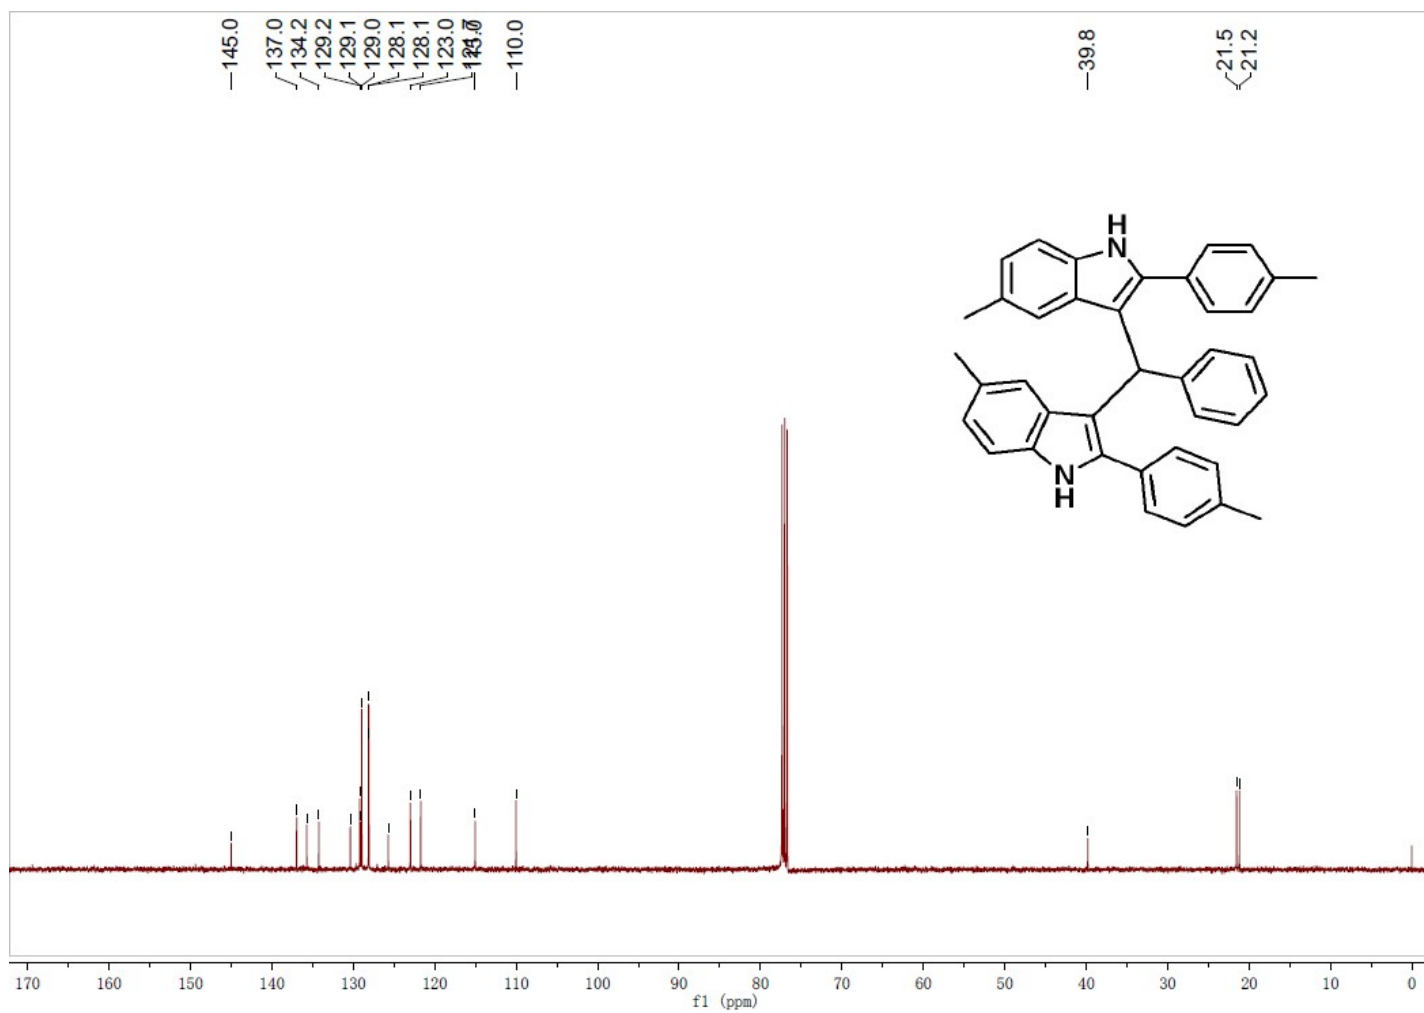

$^{13}\text{C}$  NMR Spectrum of Compound 3z

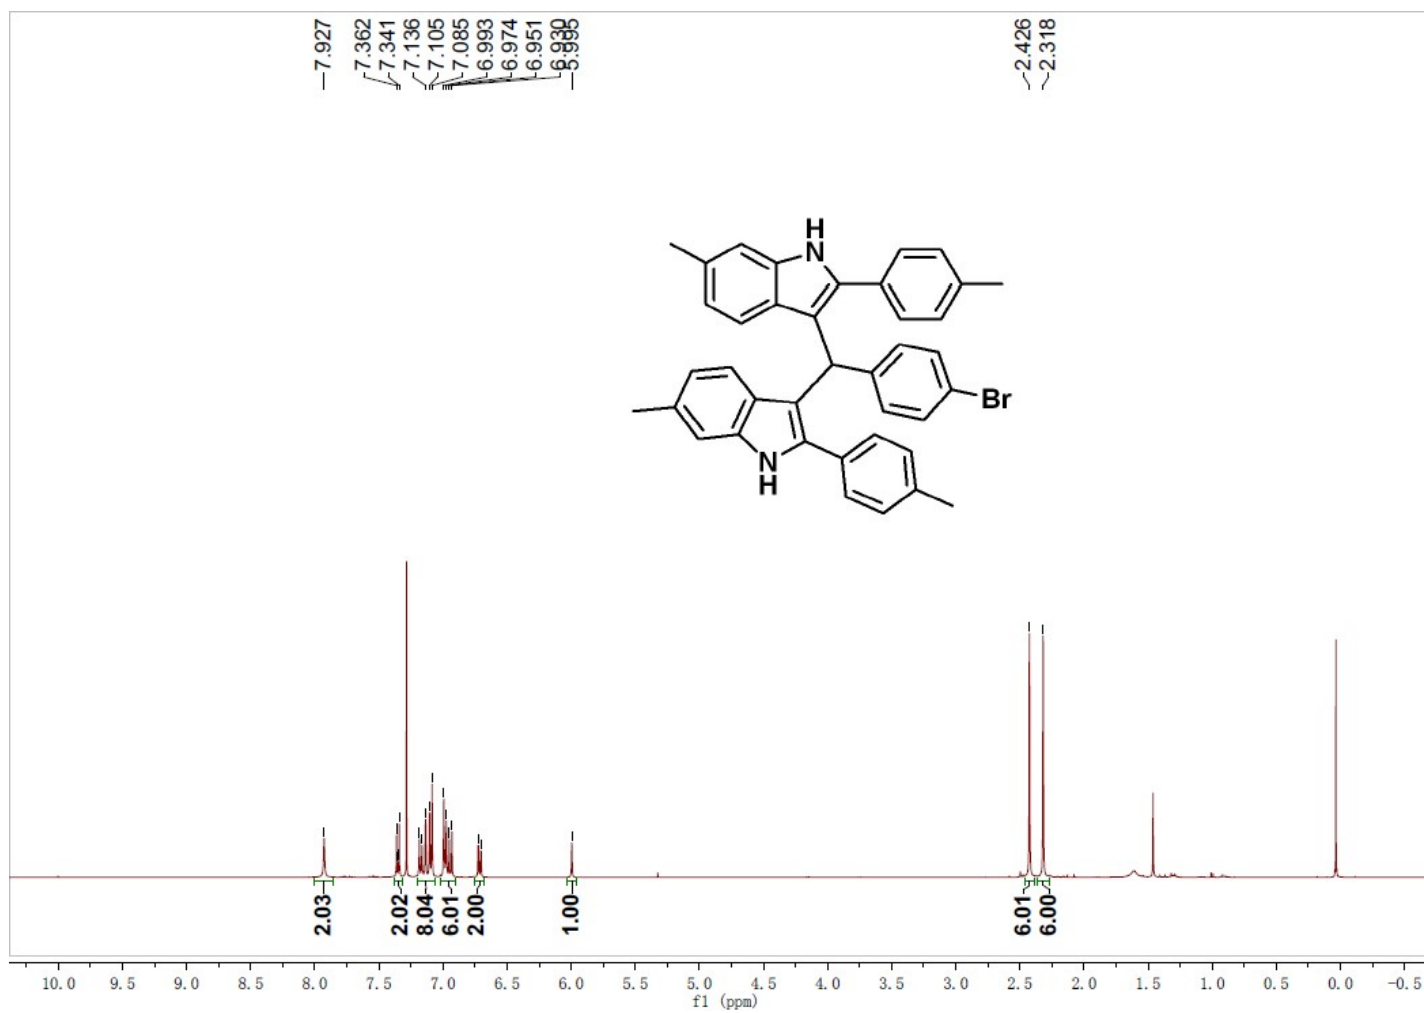

<sup>1</sup>H NMR Spectrum of Compound 3aa

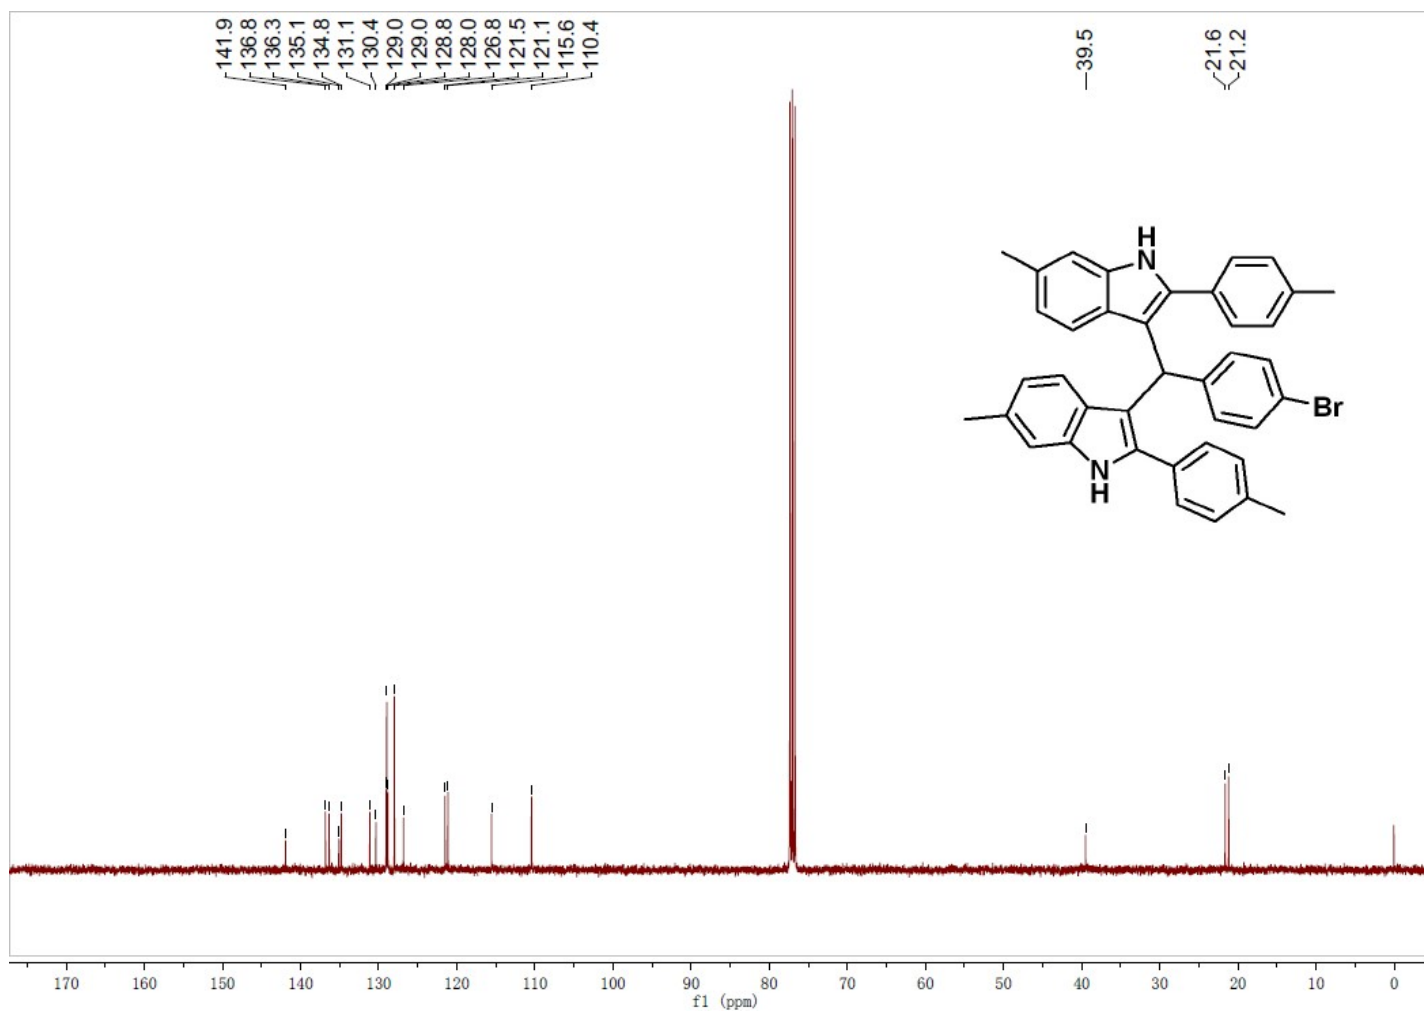

<sup>13</sup>C NMR Spectrum of Compound 3aa



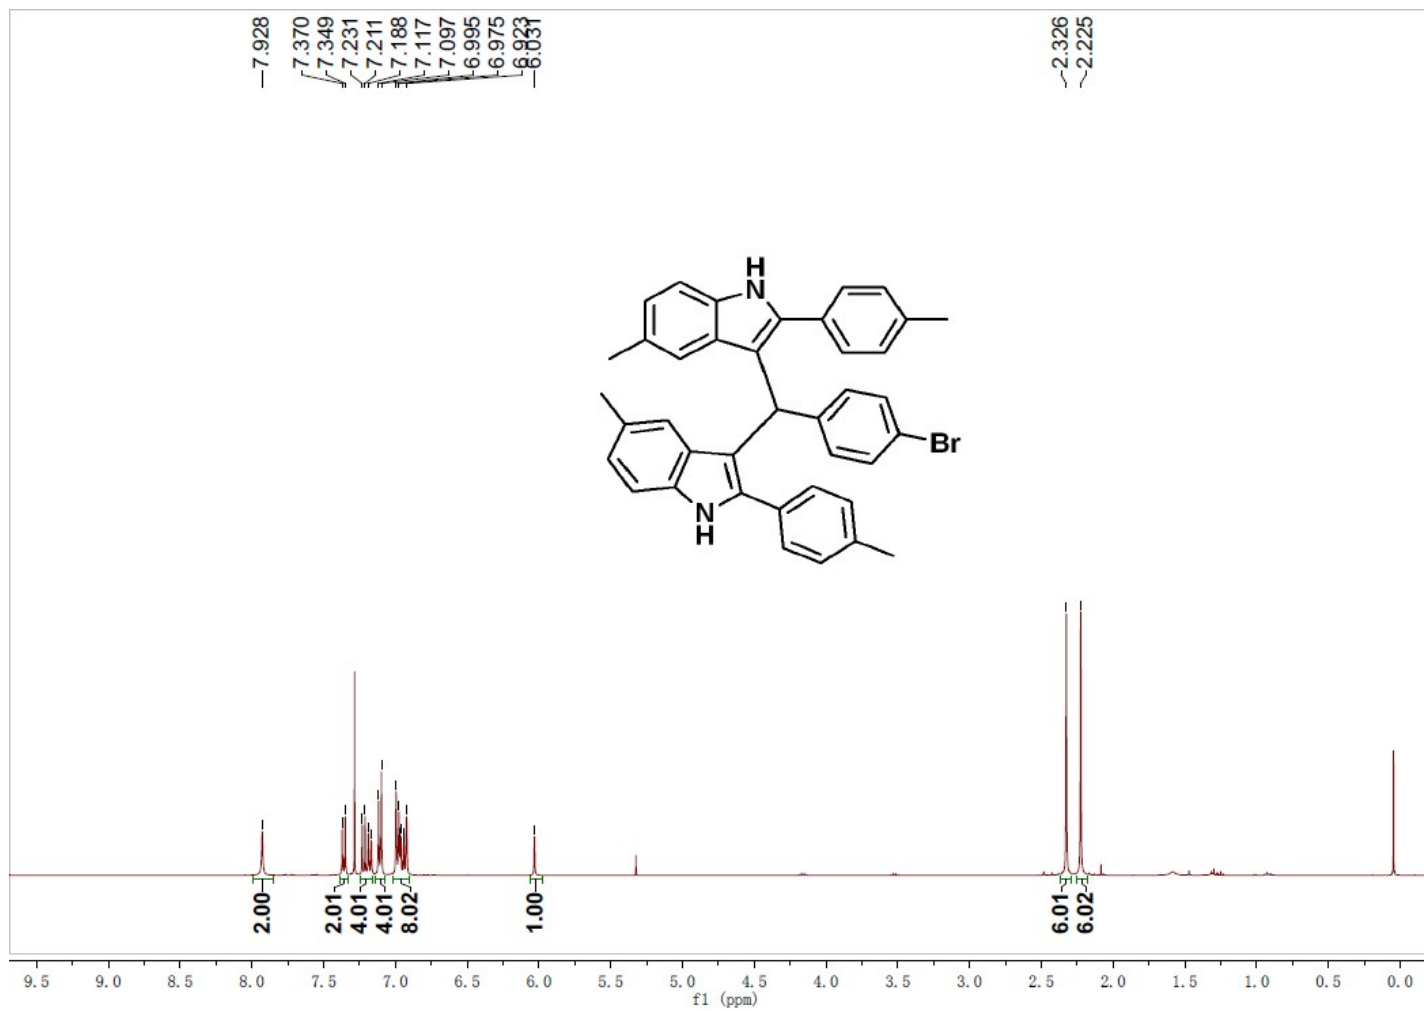

<sup>1</sup>H NMR Spectrum of Compound 3ab

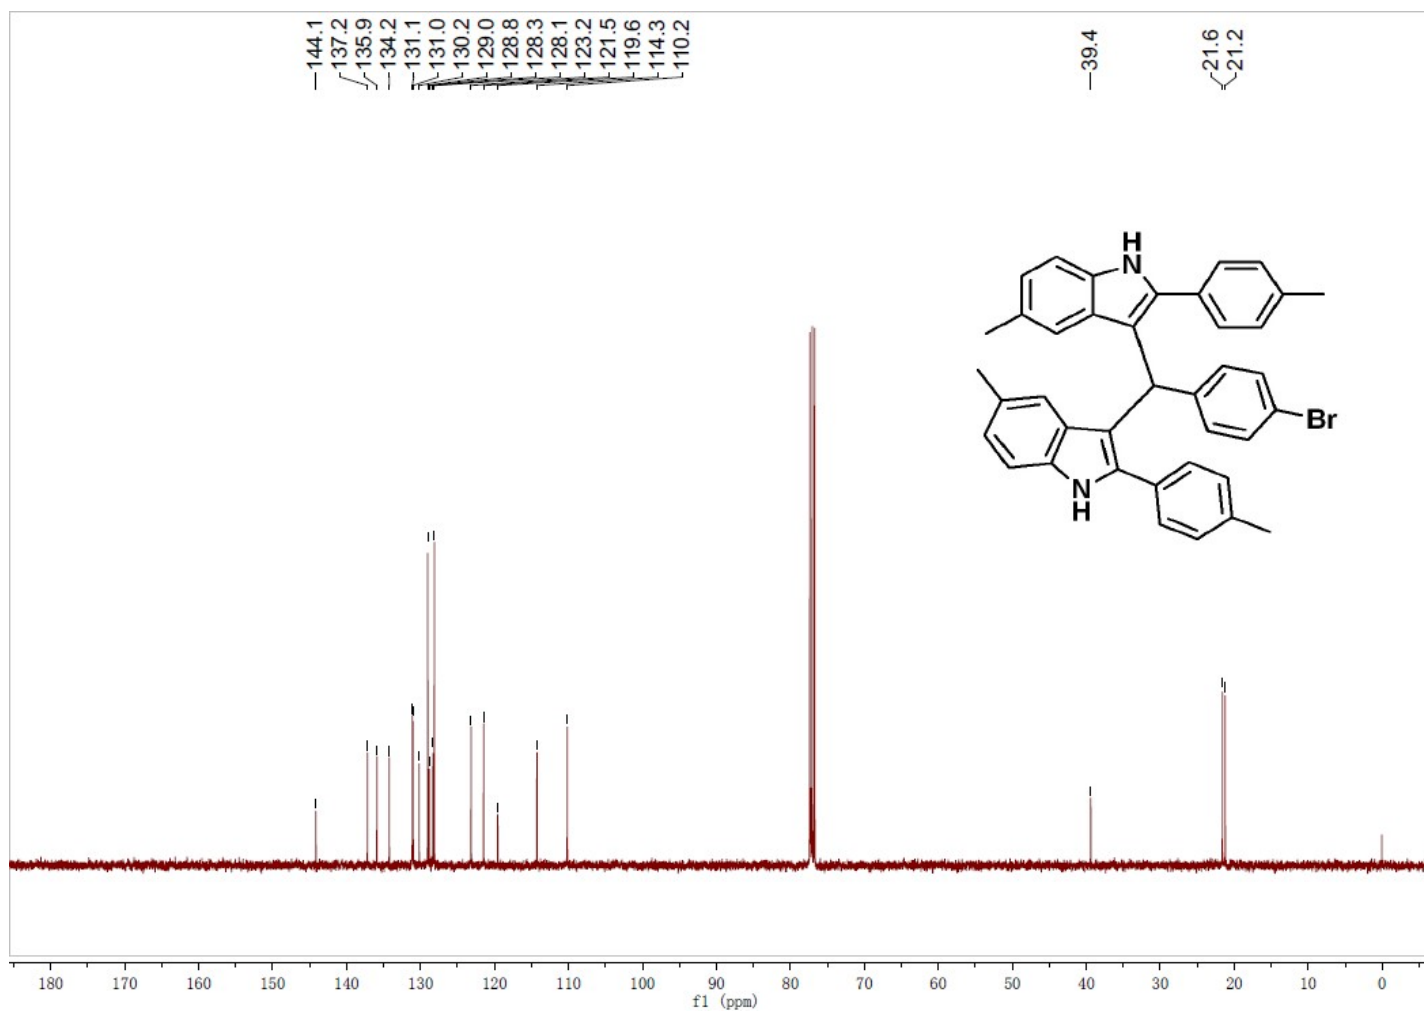

$^{13}\text{C}$  NMR Spectrum of Compound 3ab

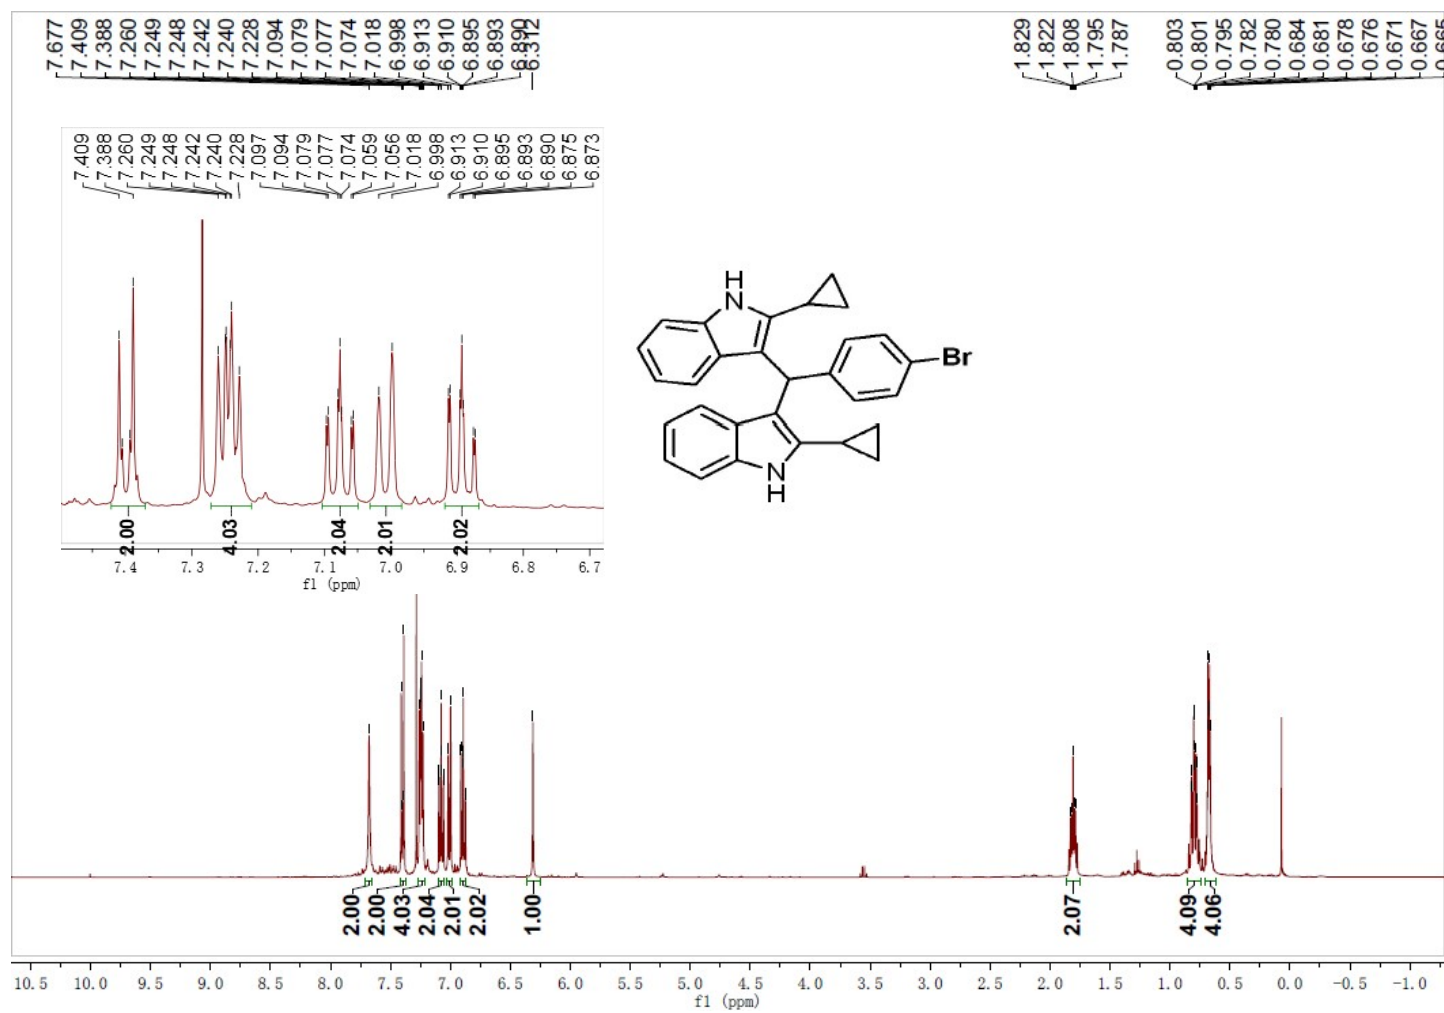

**<sup>1</sup>H NMR Spectrum of Compound 3ac**

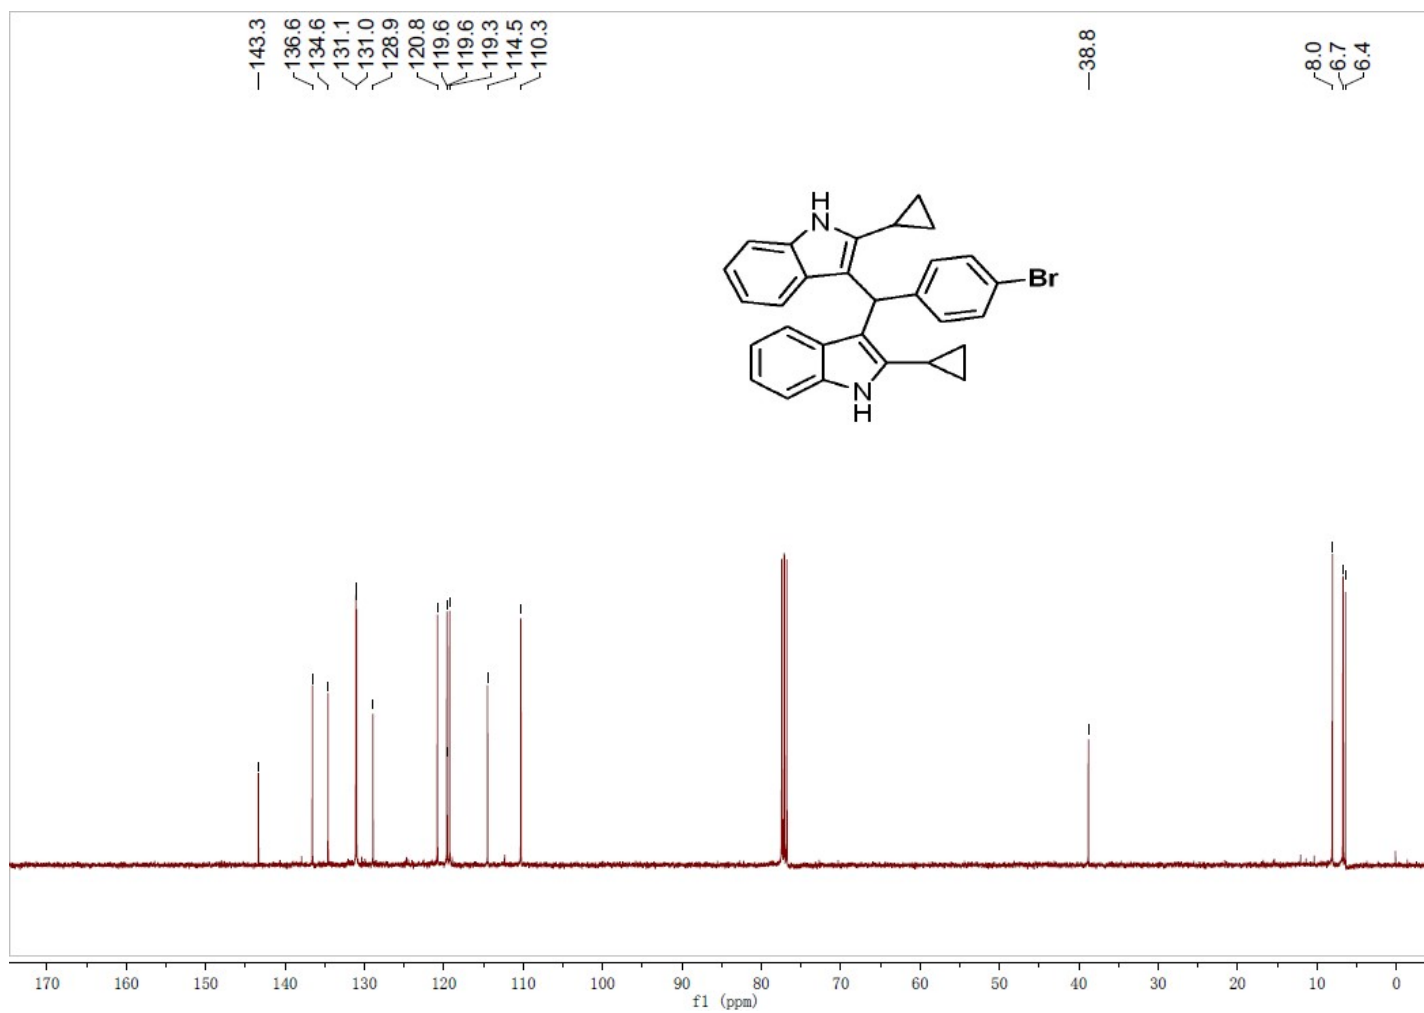

$^{13}\text{C}$  NMR Spectrum of Compound 3ac

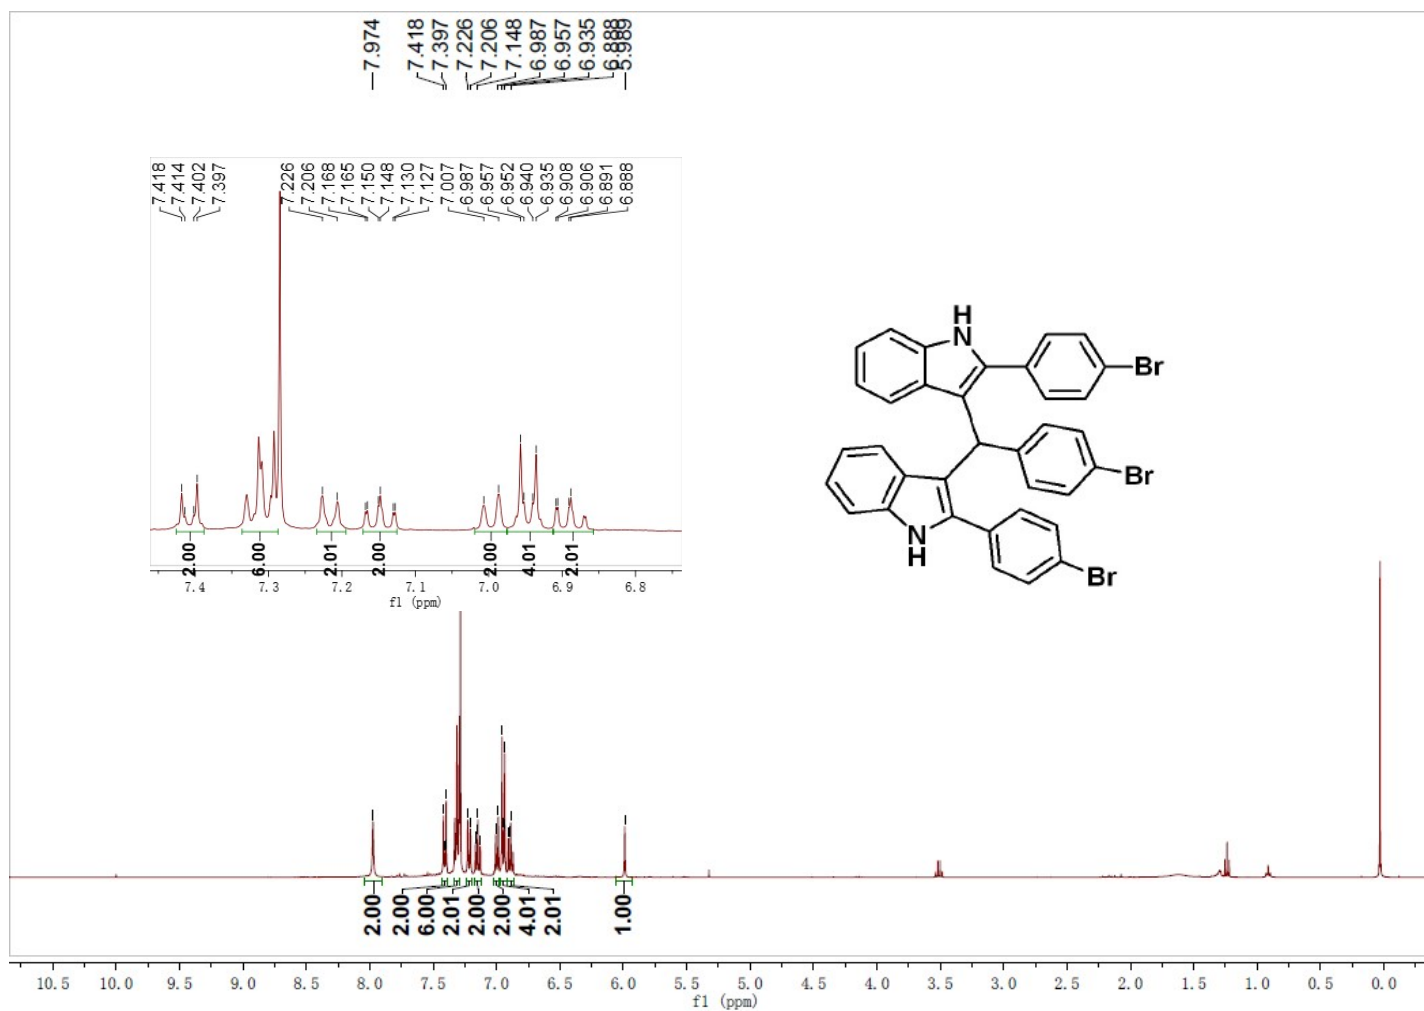

**$^1\text{H}$  NMR Spectrum of Compound 3ad**

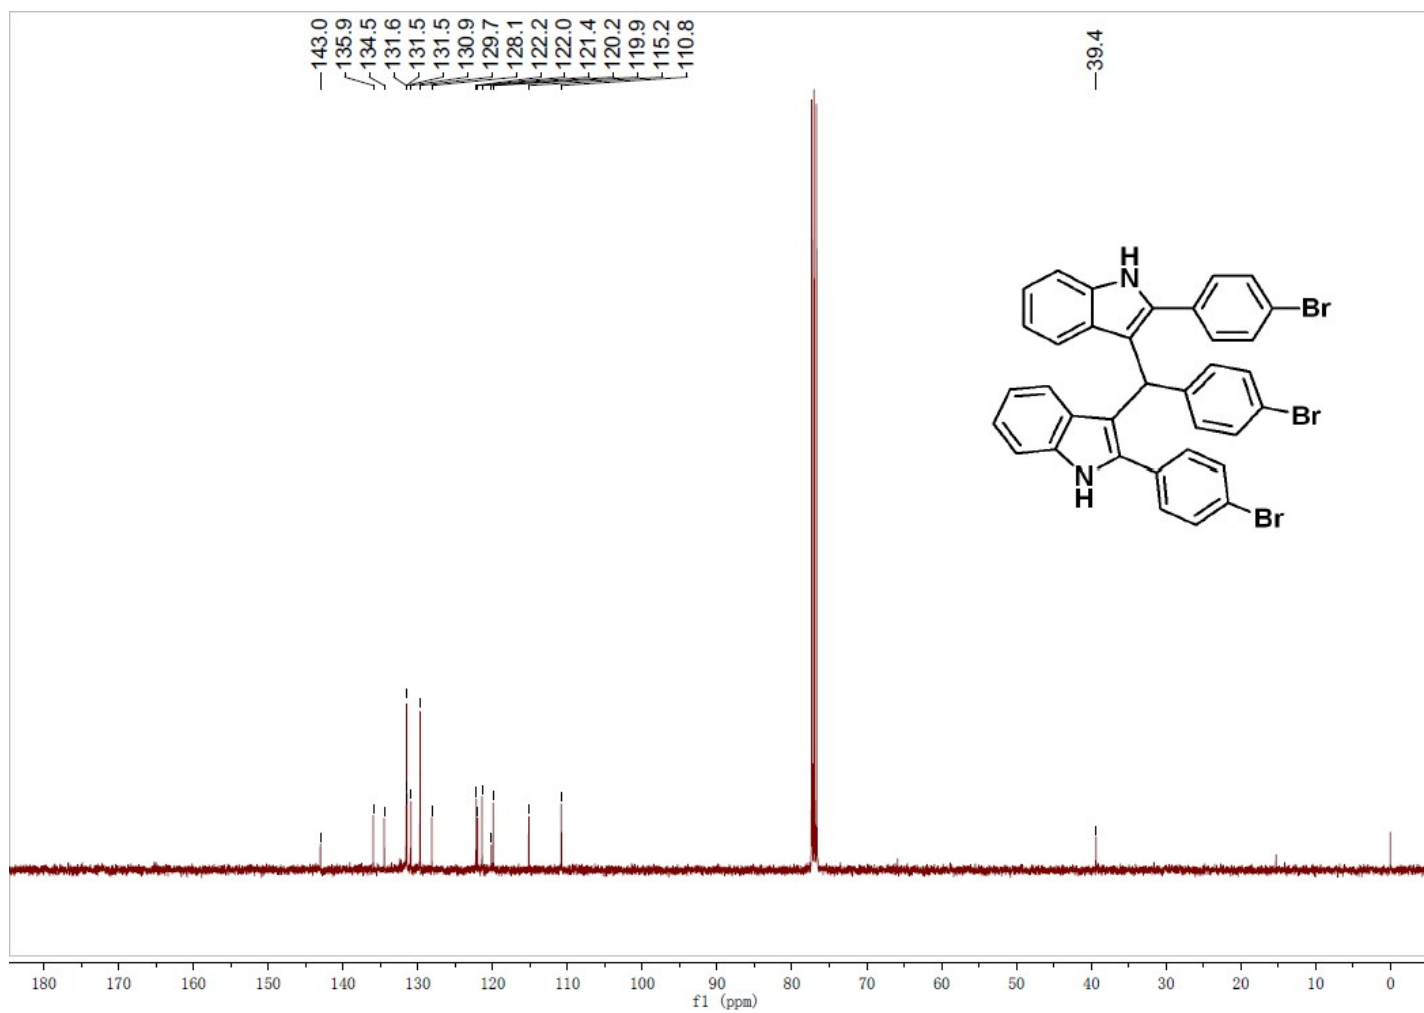

$^{13}\text{C}$  NMR Spectrum of Compound 3ad

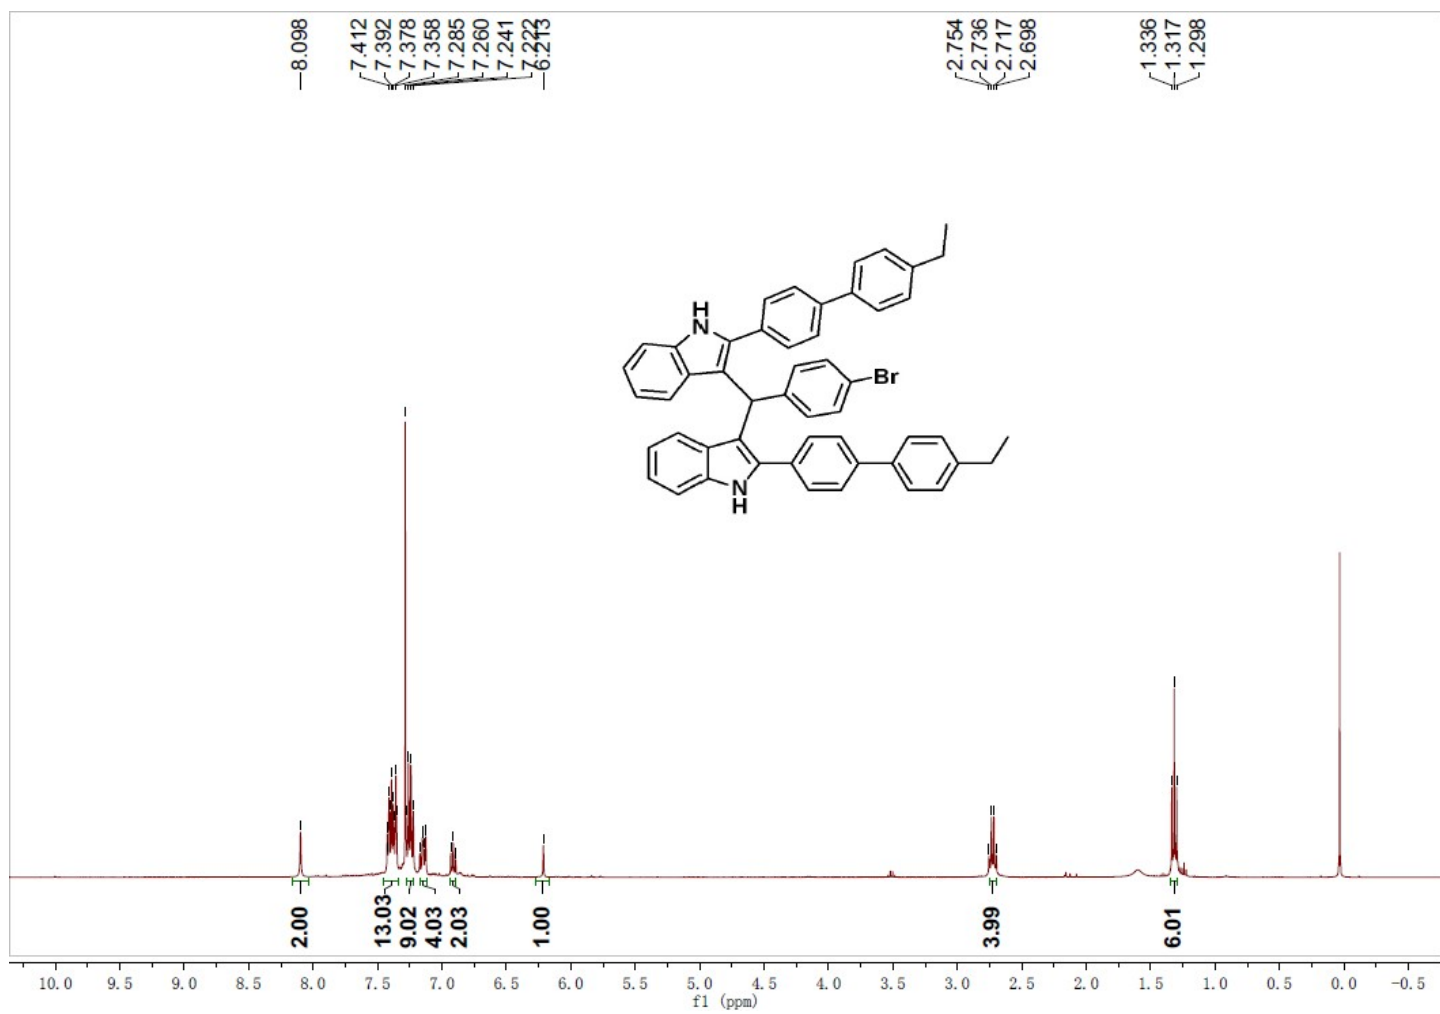

<sup>1</sup>H NMR Spectrum of Compound 3ae

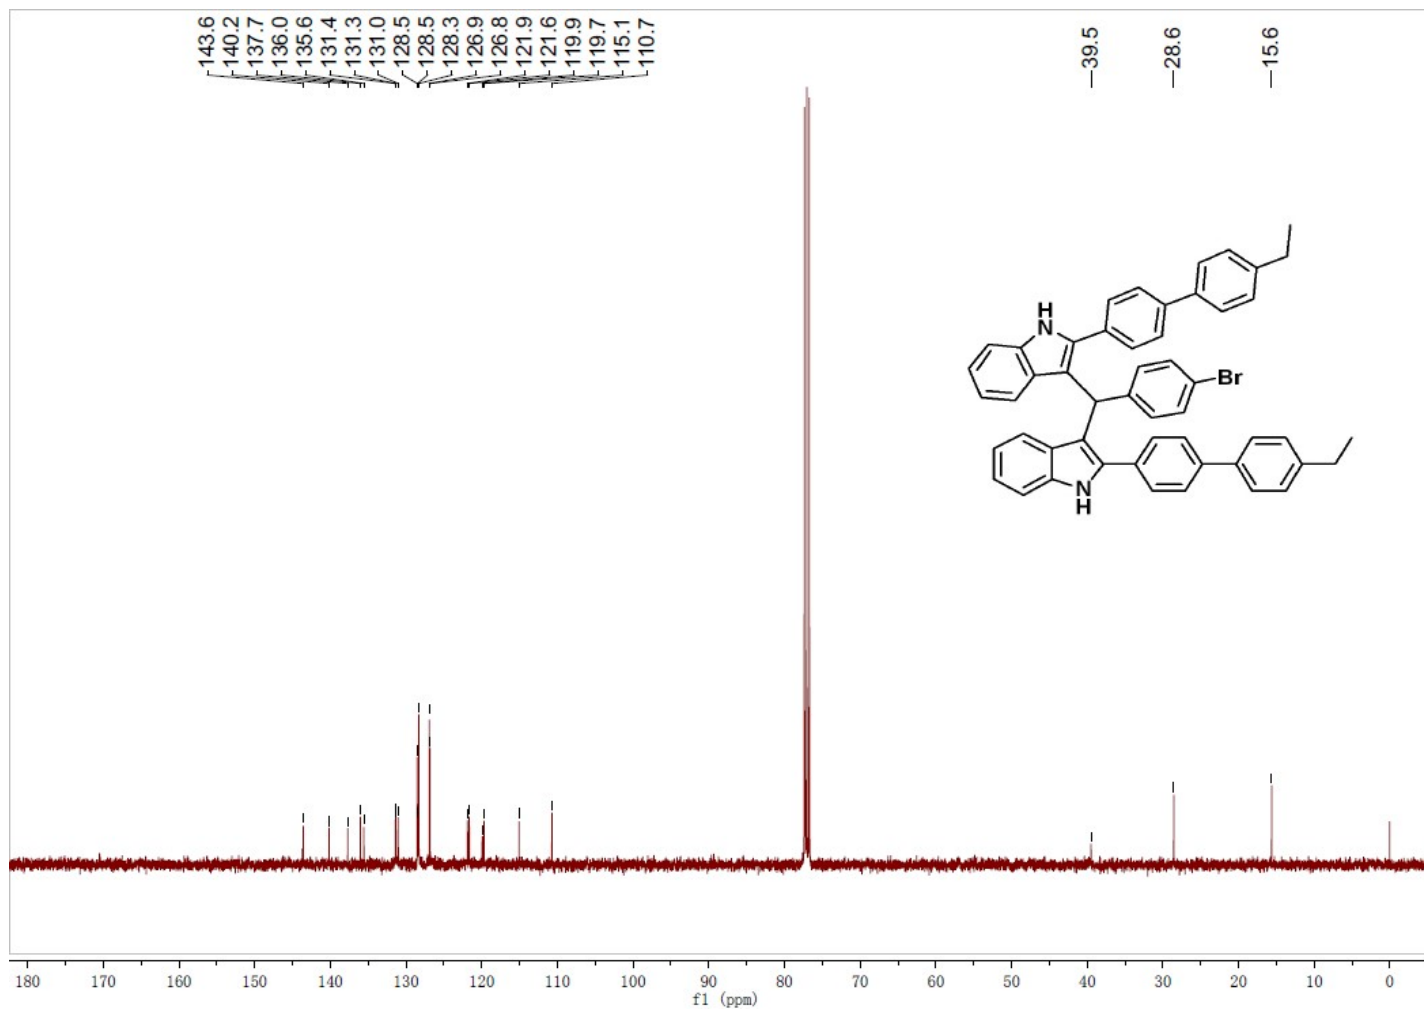

<sup>13</sup>C NMR Spectrum of Compound 3ae



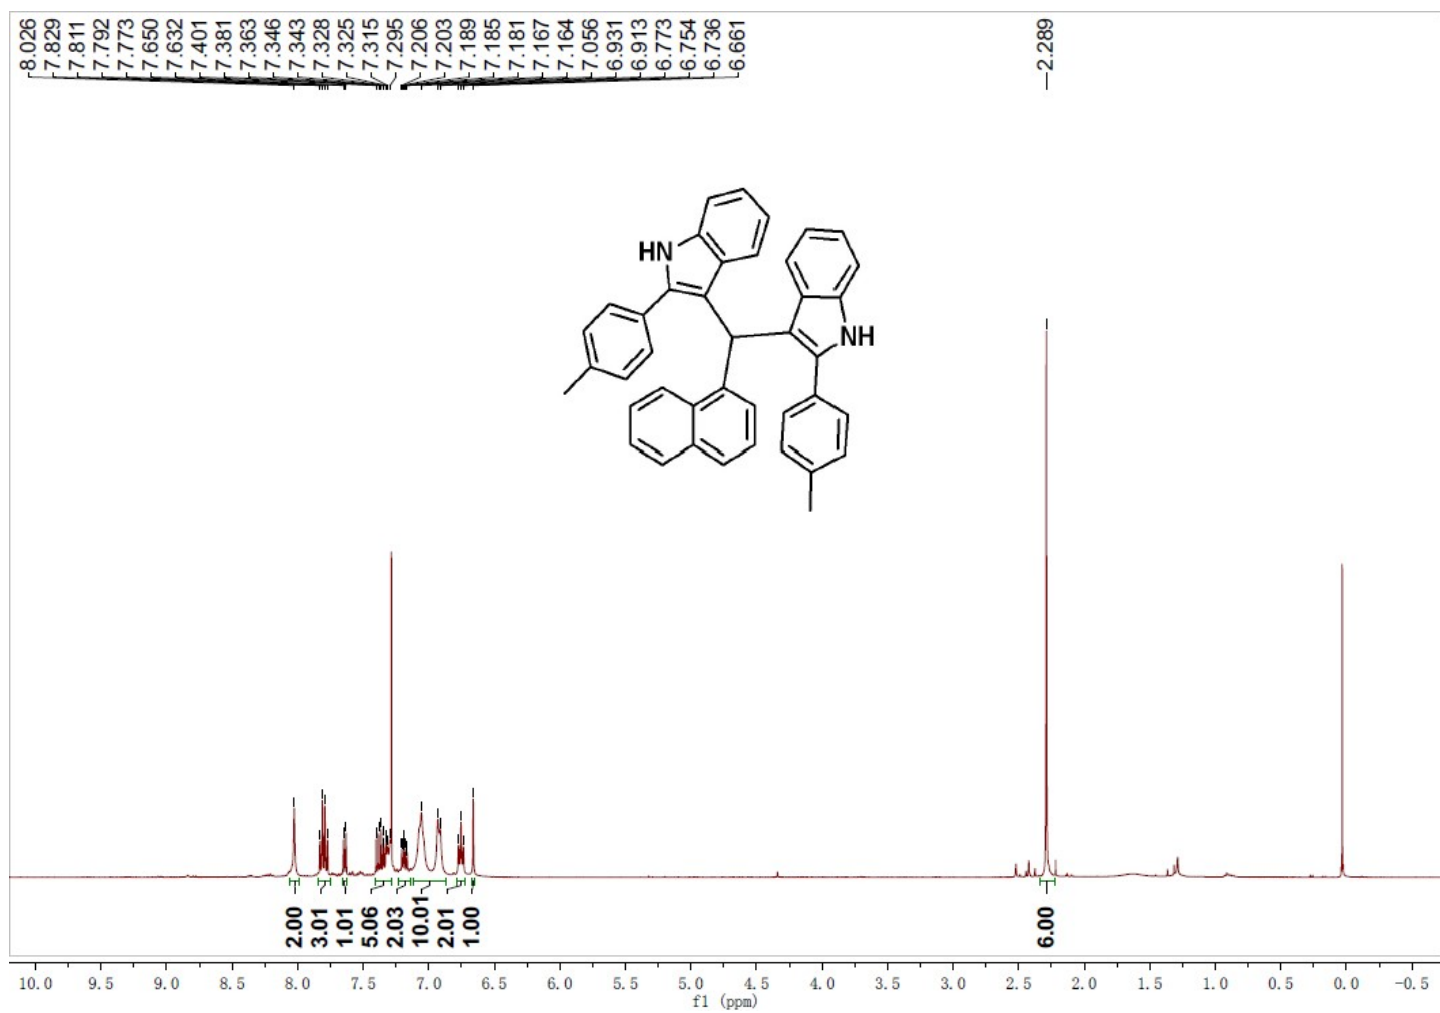

<sup>1</sup>H NMR Spectrum of Compound 3af

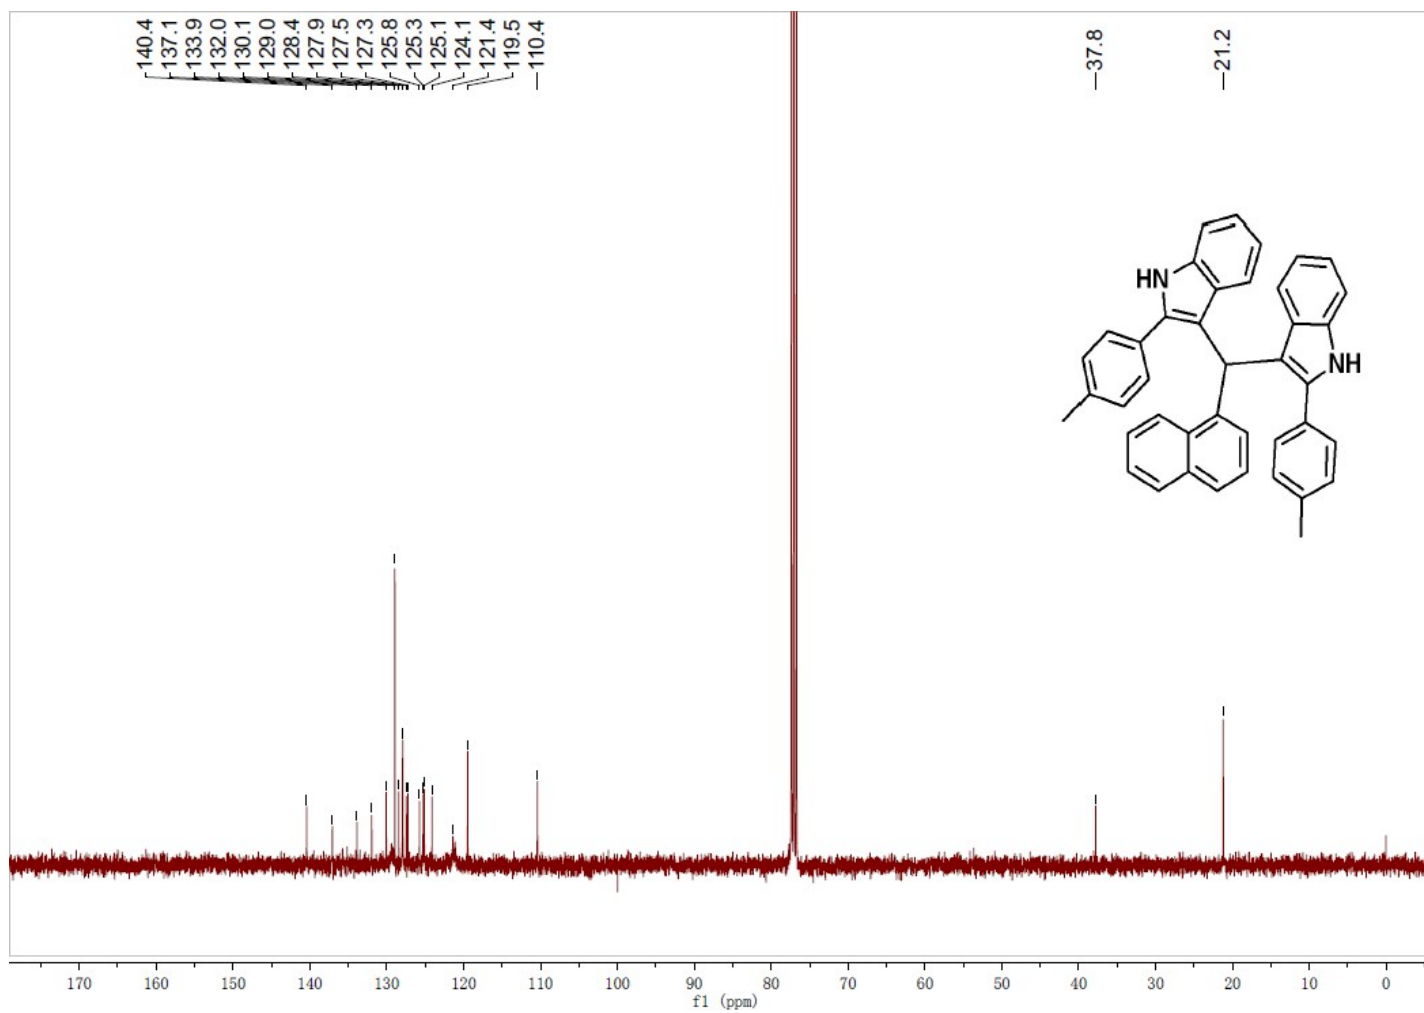

$^{13}\text{C}$  NMR Spectrum of Compound 3af

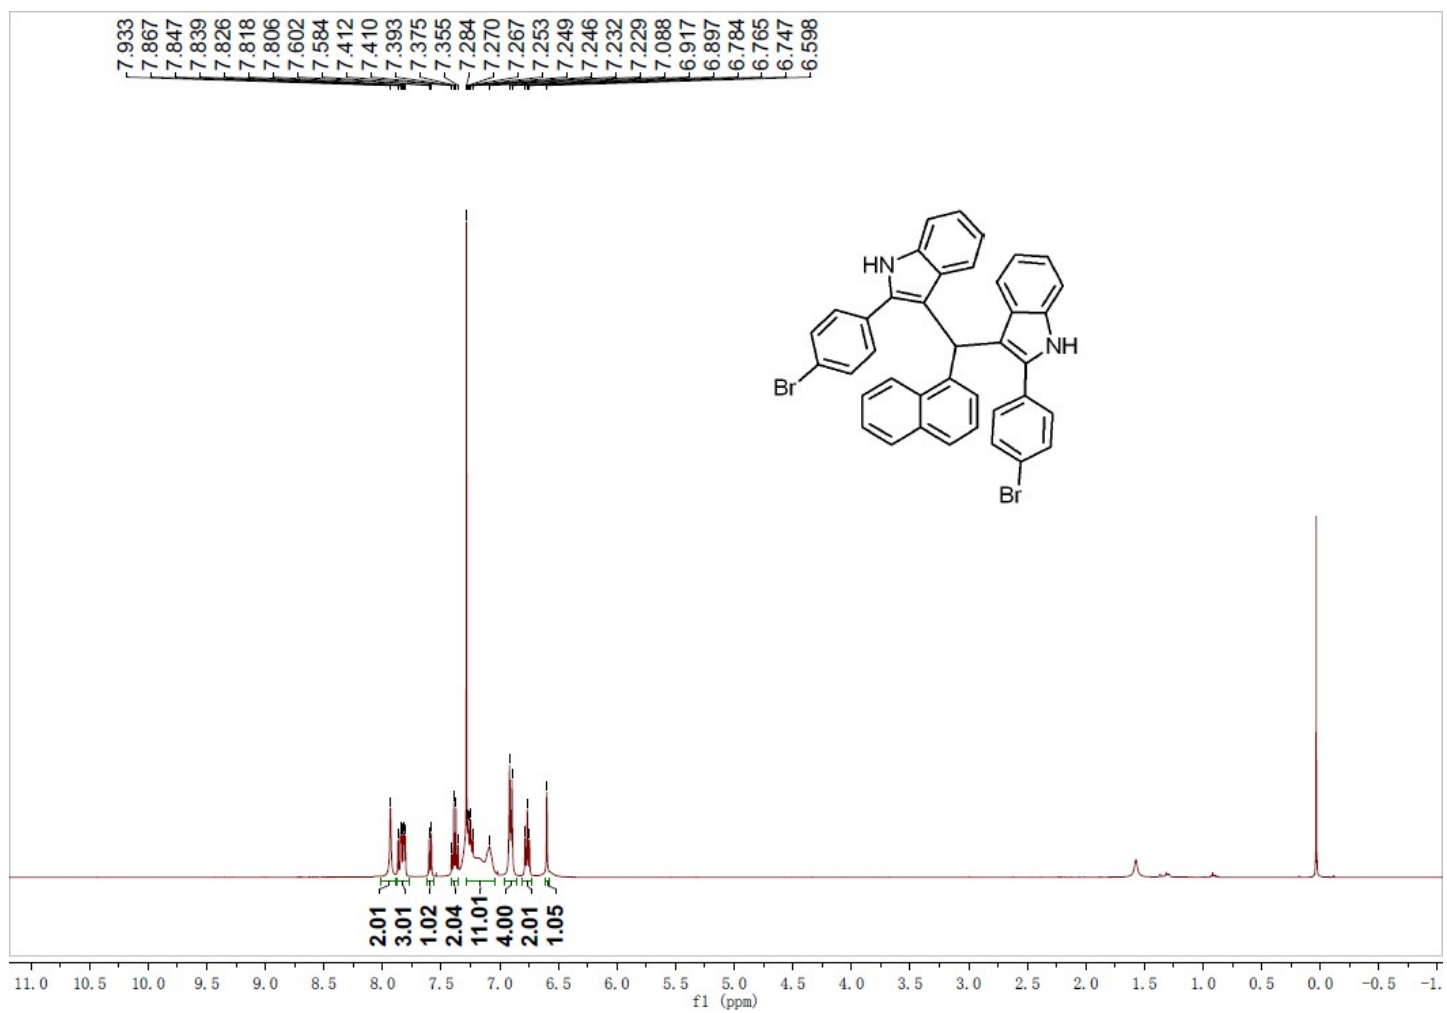

**<sup>1</sup>H NMR Spectrum of Compound 3ag**

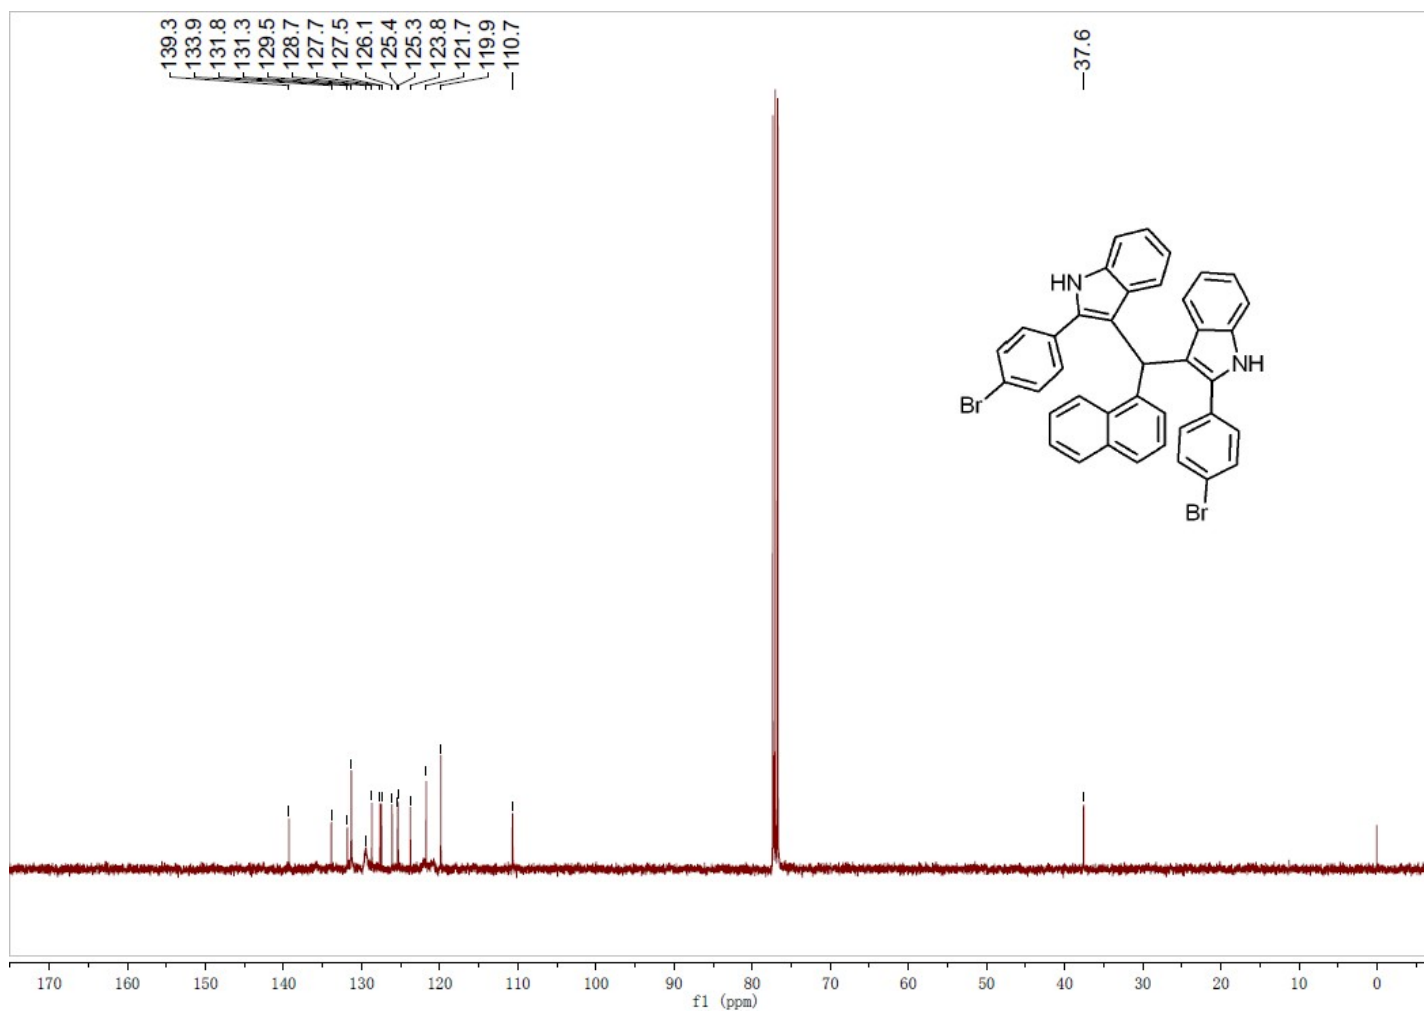

$^{13}\text{C}$  NMR Spectrum of Compound 3ag

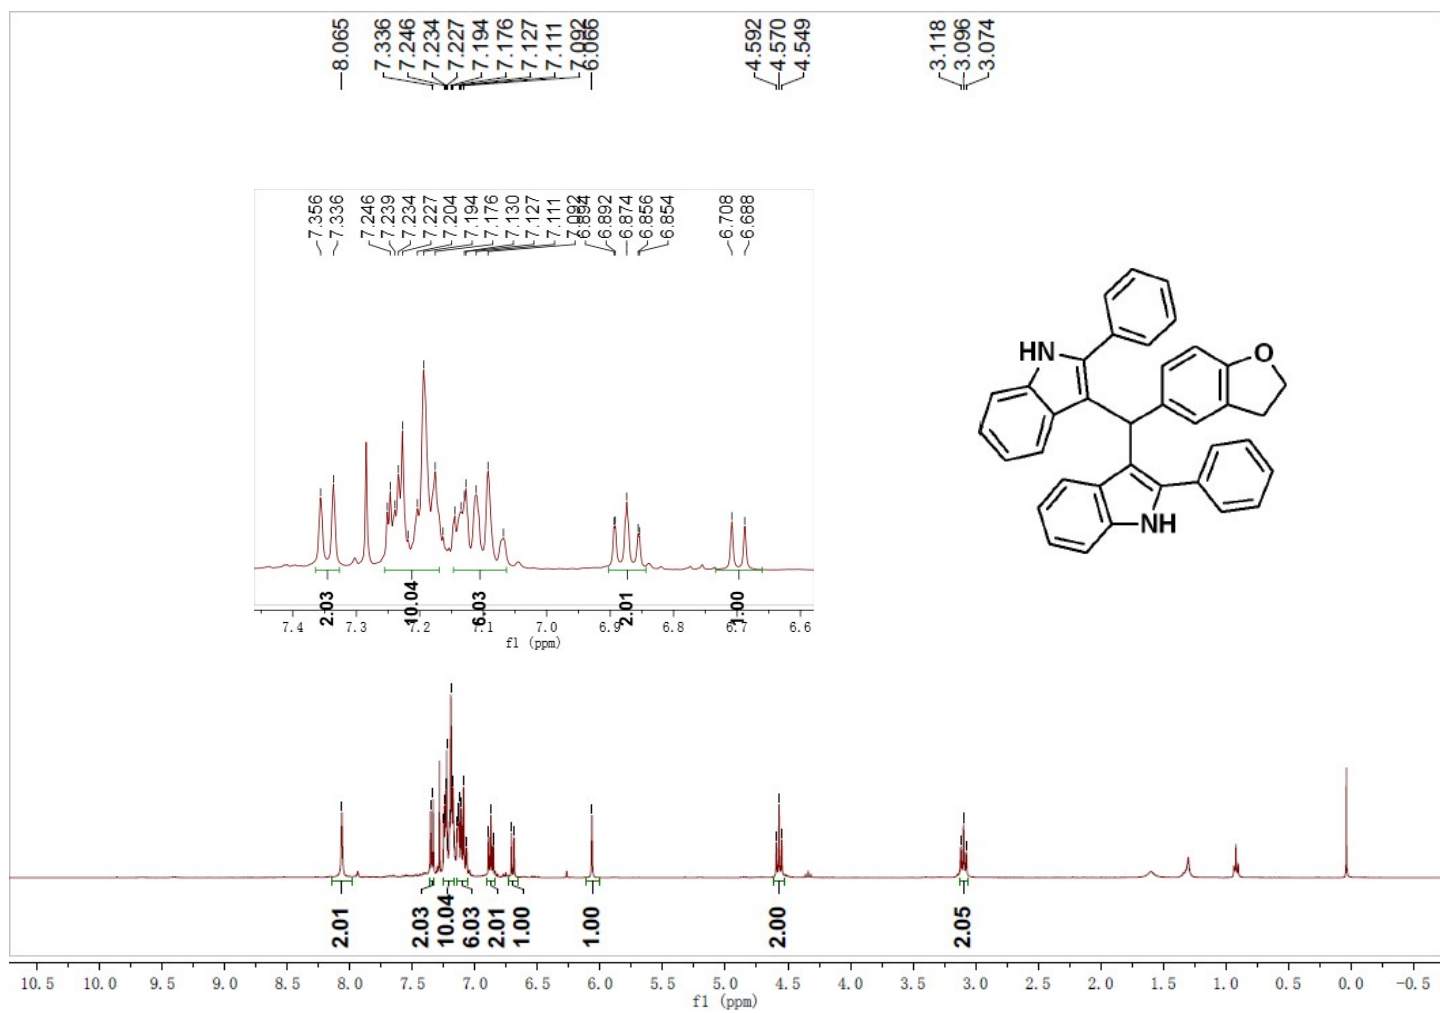

<sup>1</sup>H NMR Spectrum of Compound 3ah

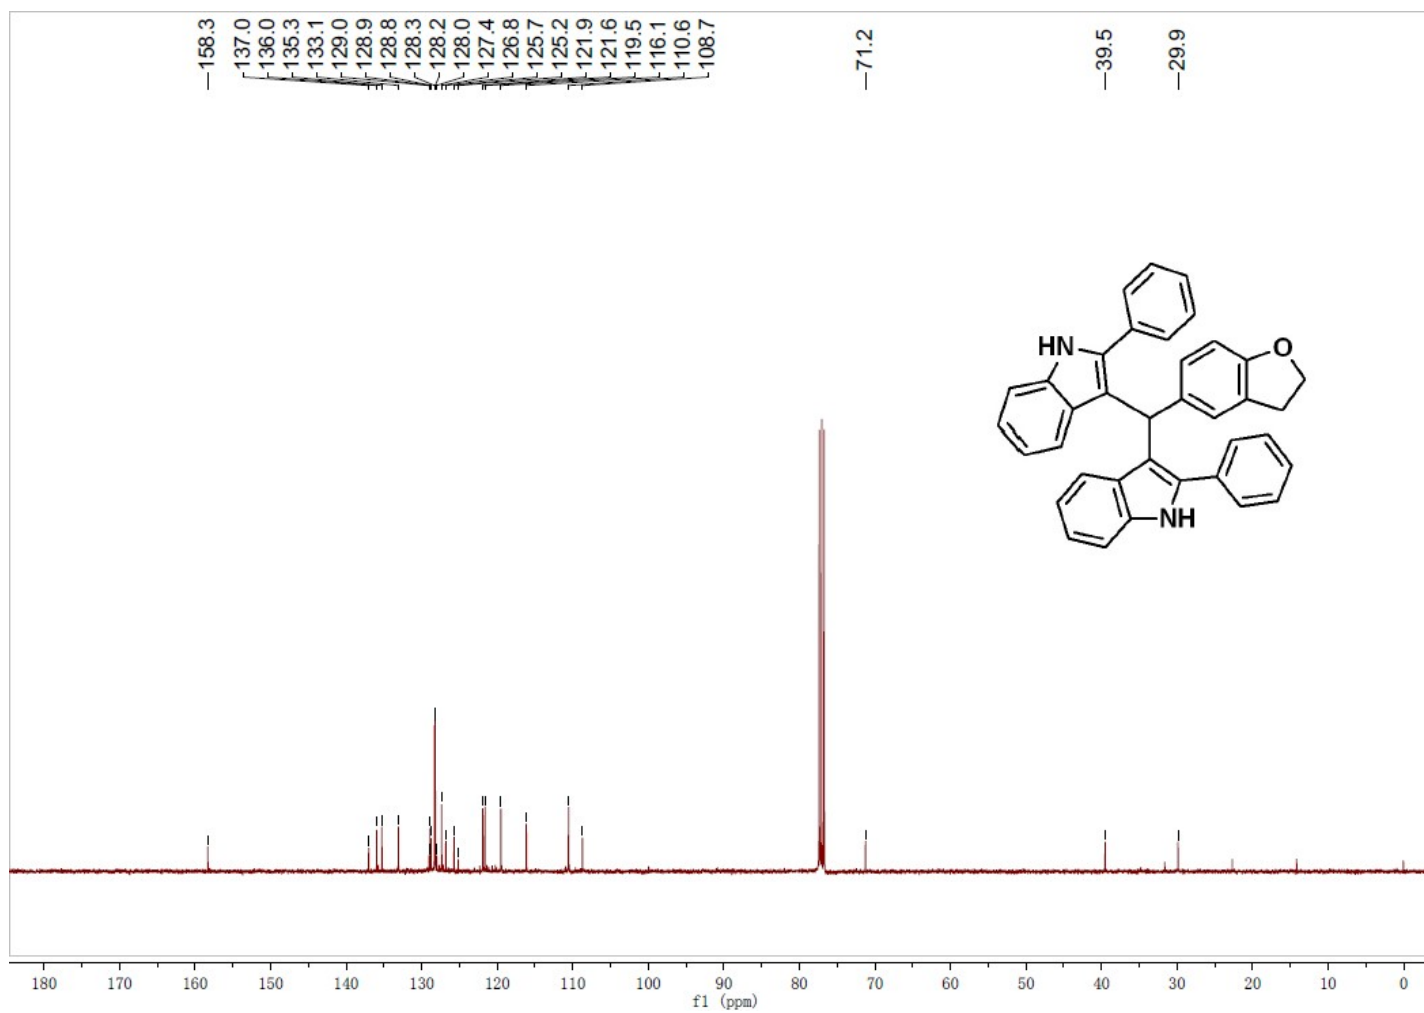

**<sup>13</sup>C NMR Spectrum of Compound 3ah**

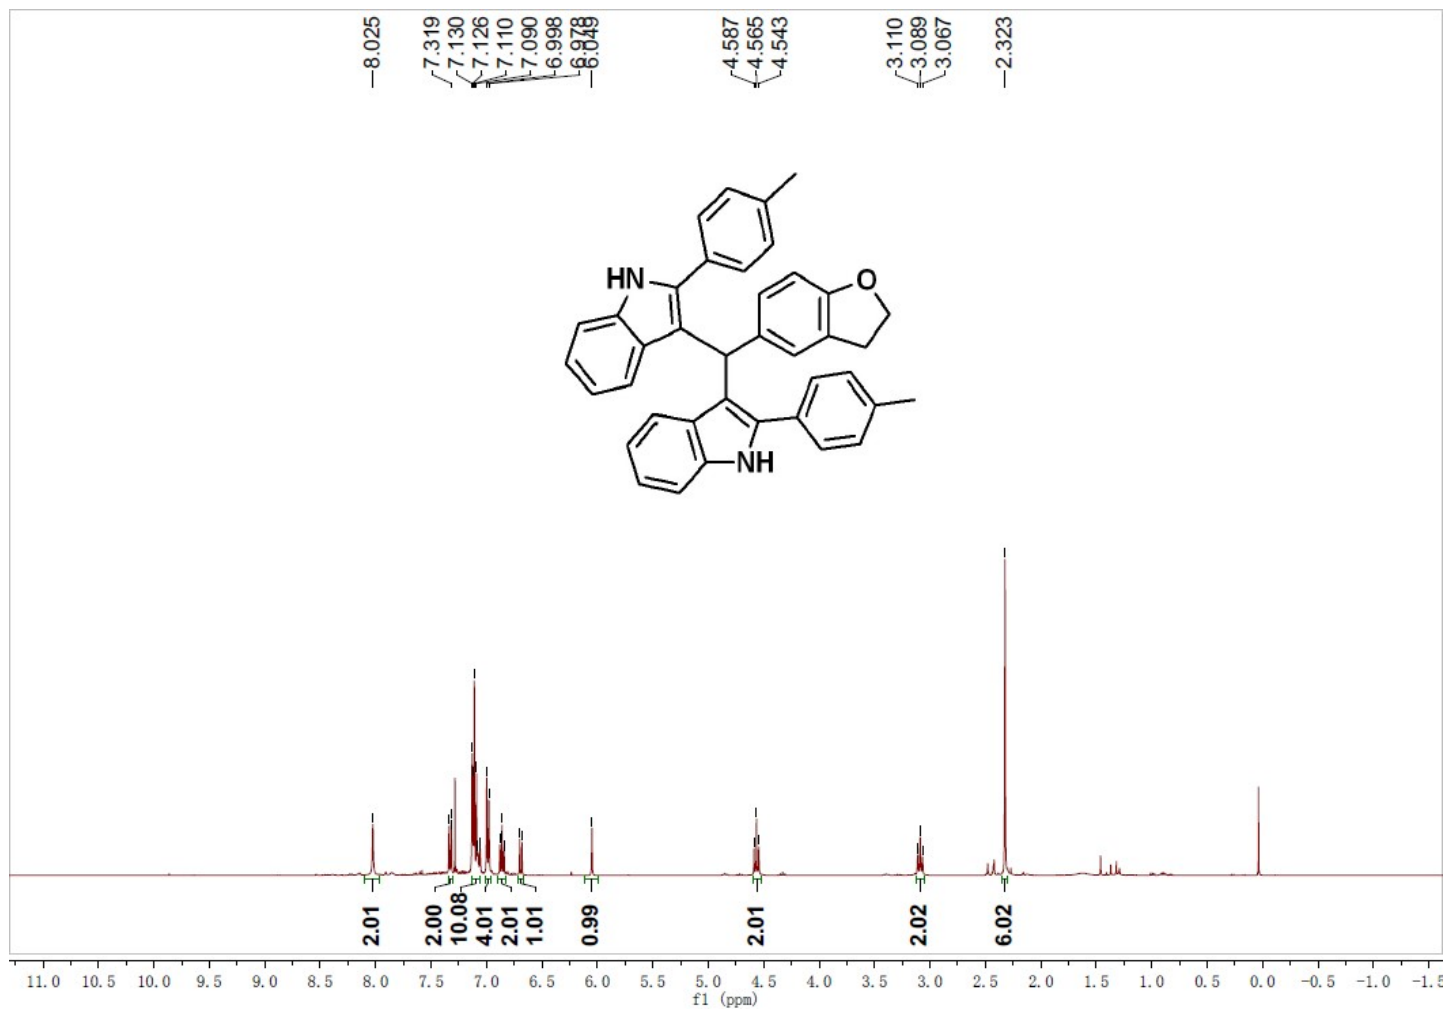

<sup>1</sup>H NMR Spectrum of Compound 3ai

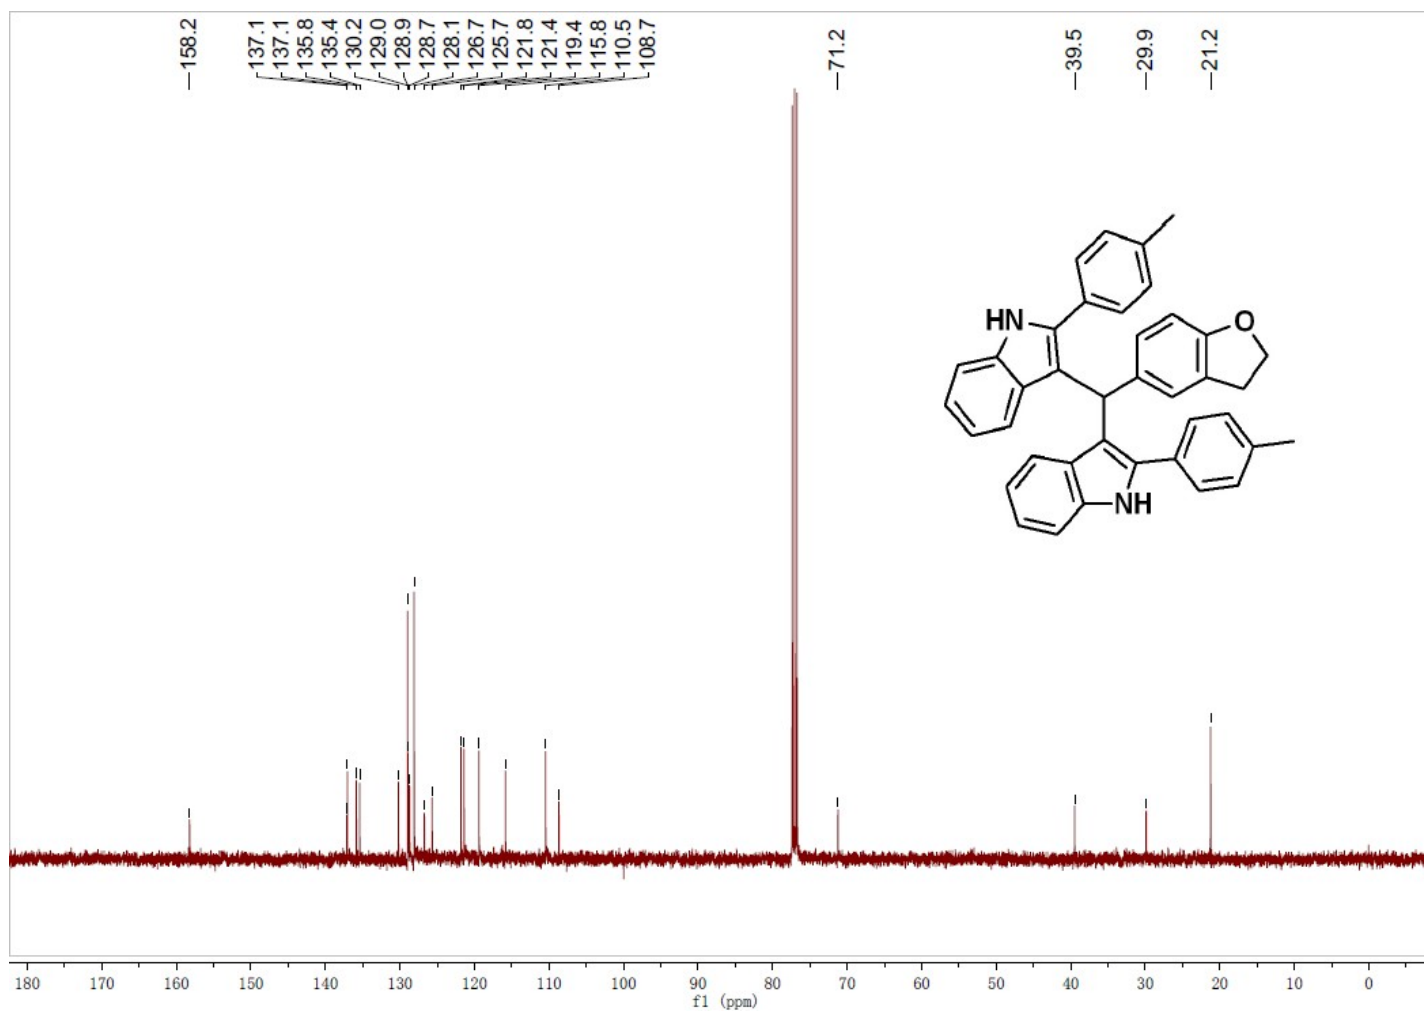

$^{13}\text{C}$  NMR Spectrum of Compound 3ai



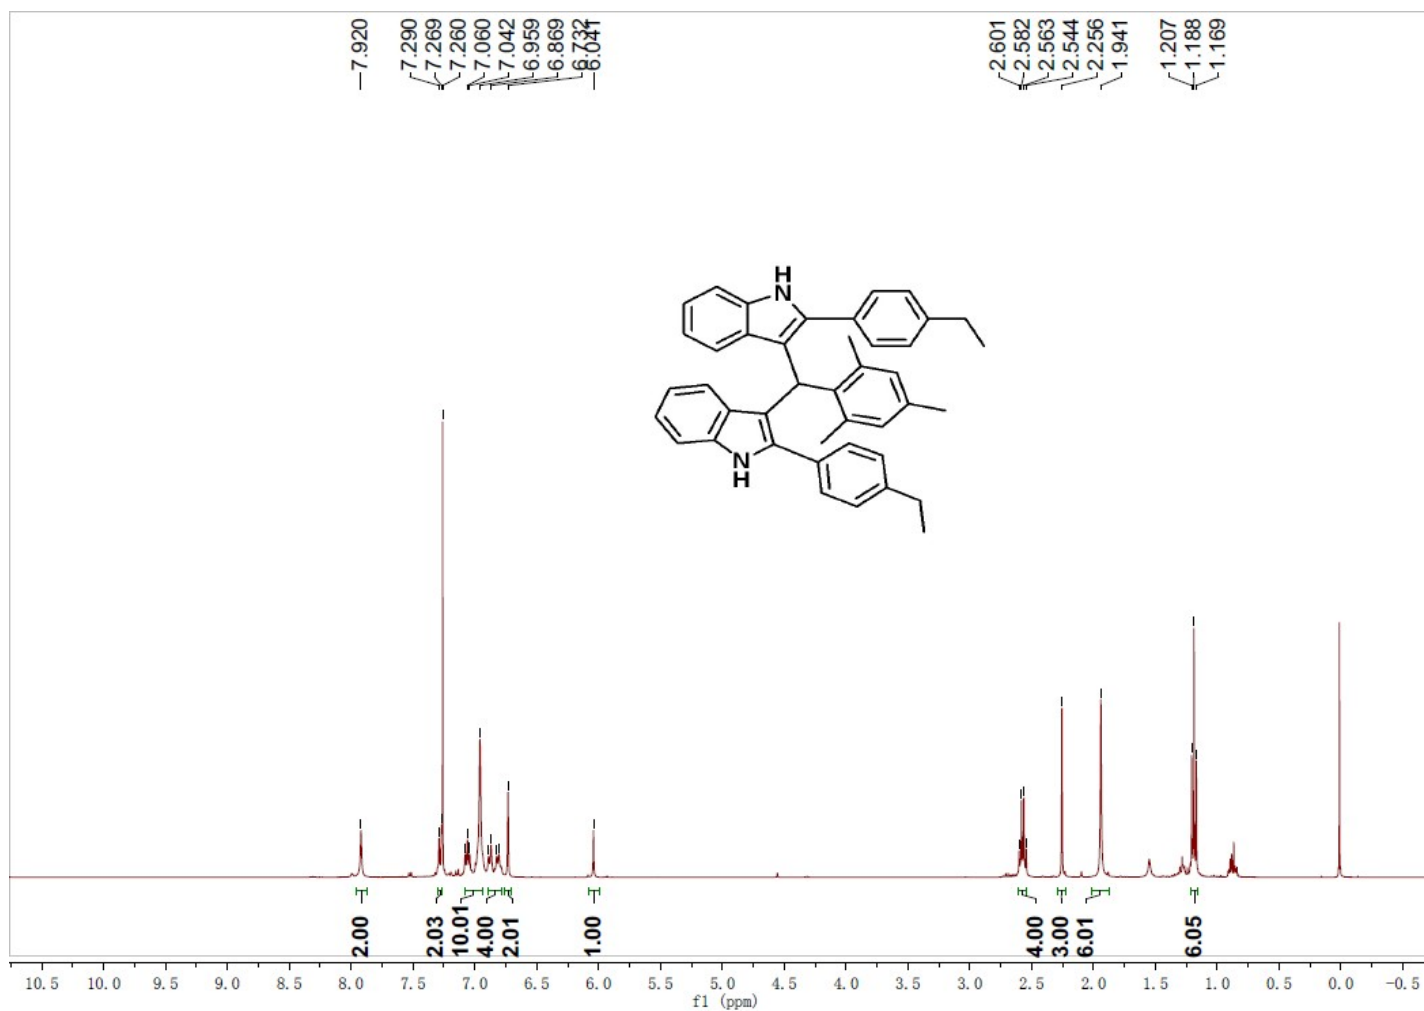

**<sup>1</sup>H NMR Spectrum of Compound 3aj**

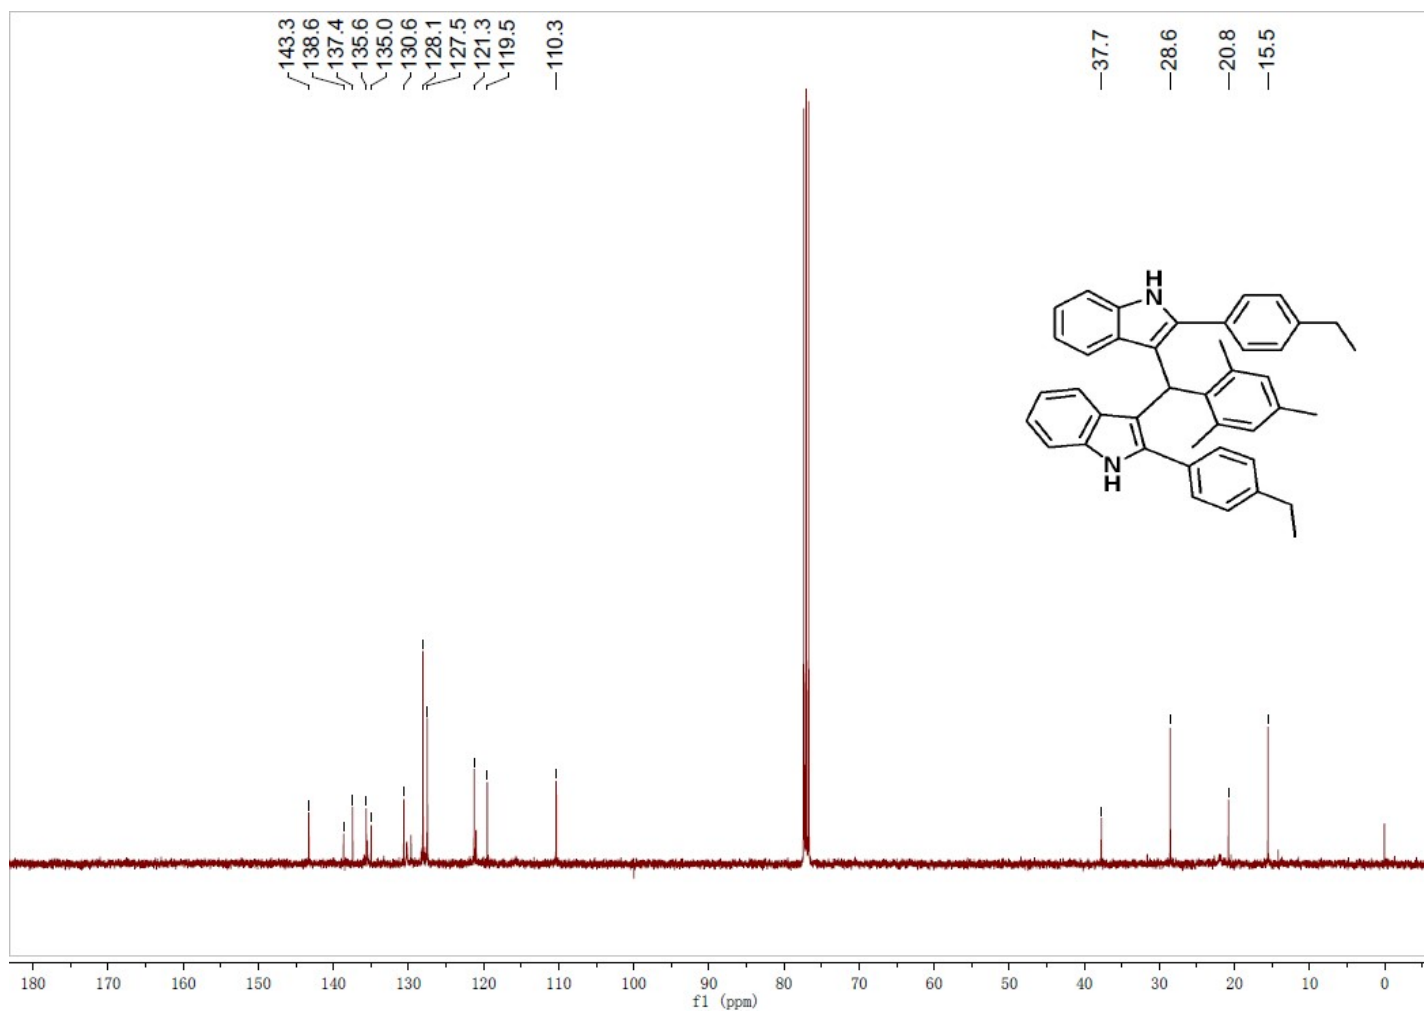

**<sup>13</sup>C NMR Spectrum of Compound 3aj**

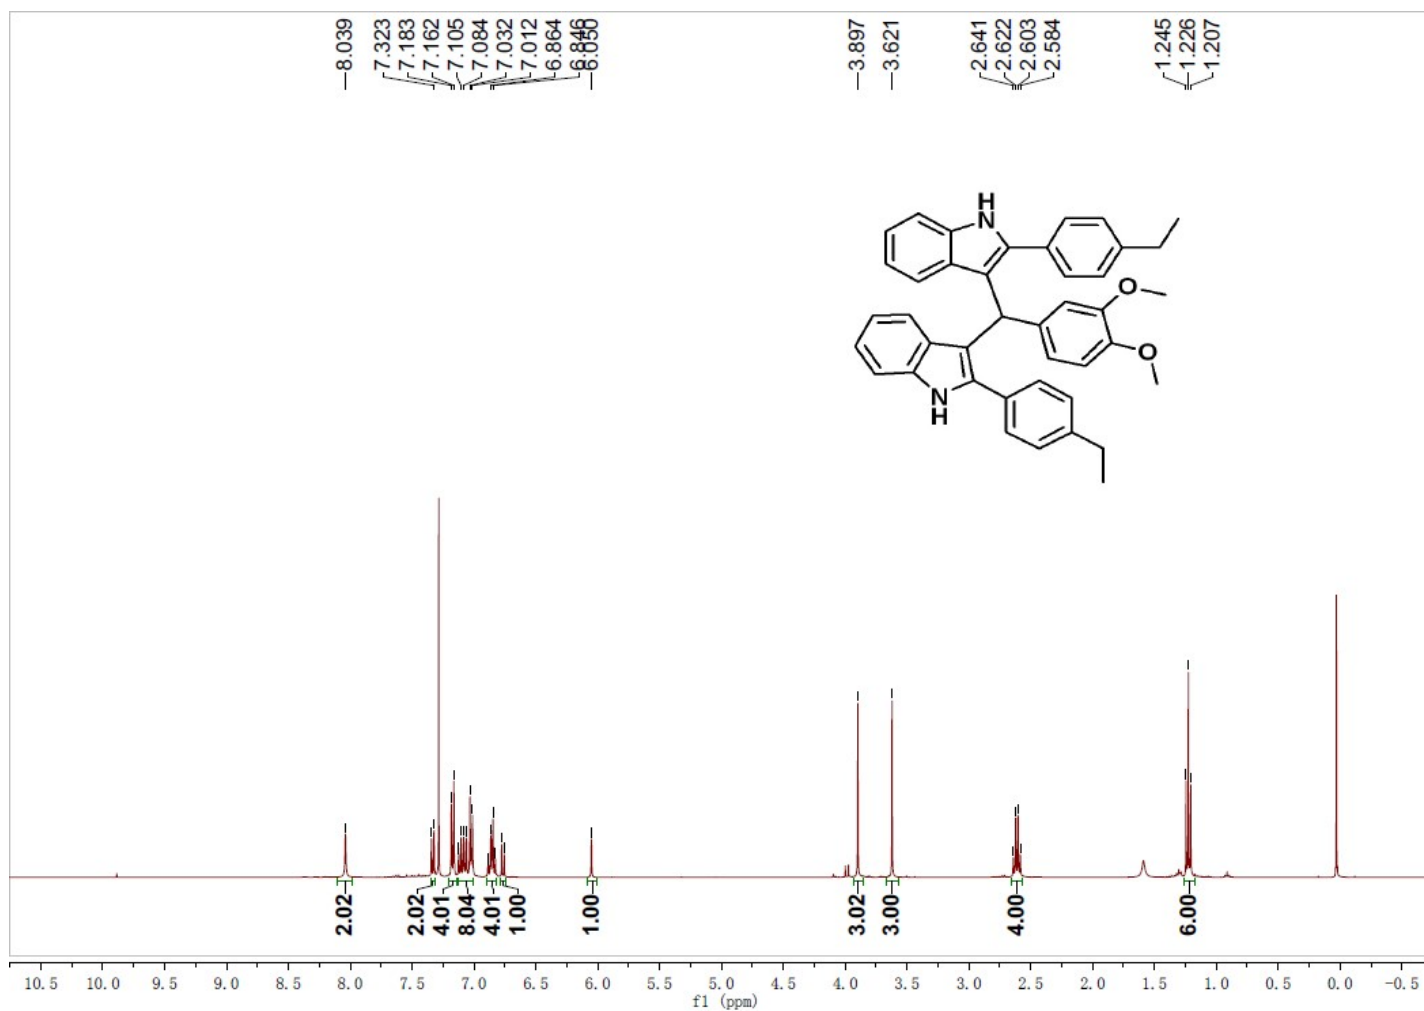

**<sup>1</sup>H NMR Spectrum of Compound 3ak**

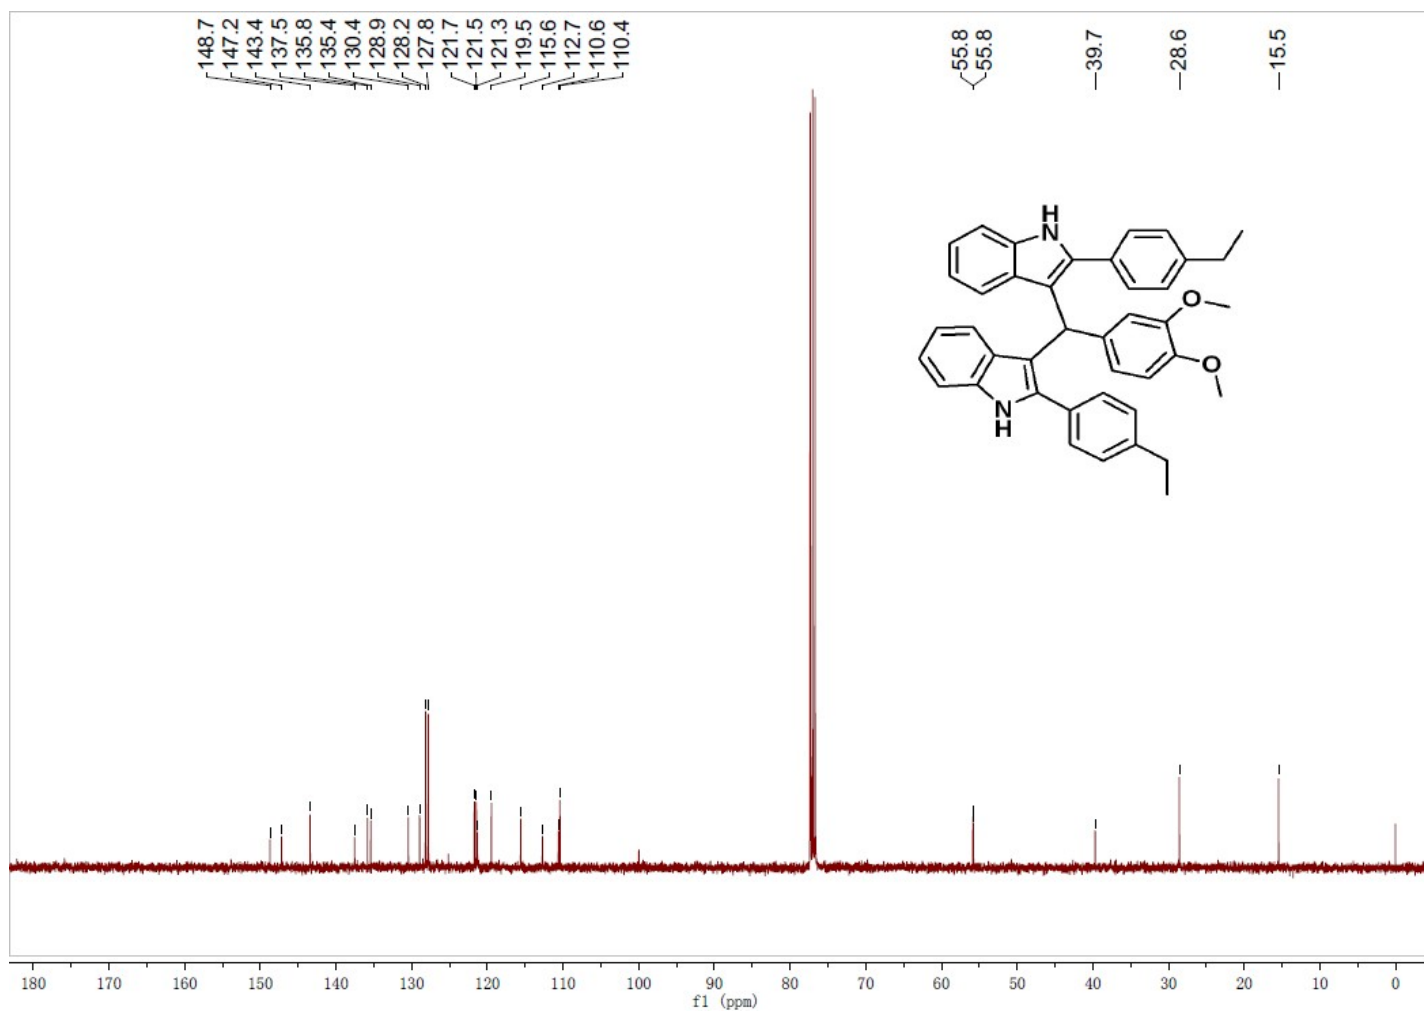

<sup>13</sup>C NMR Spectrum of Compound 3ak

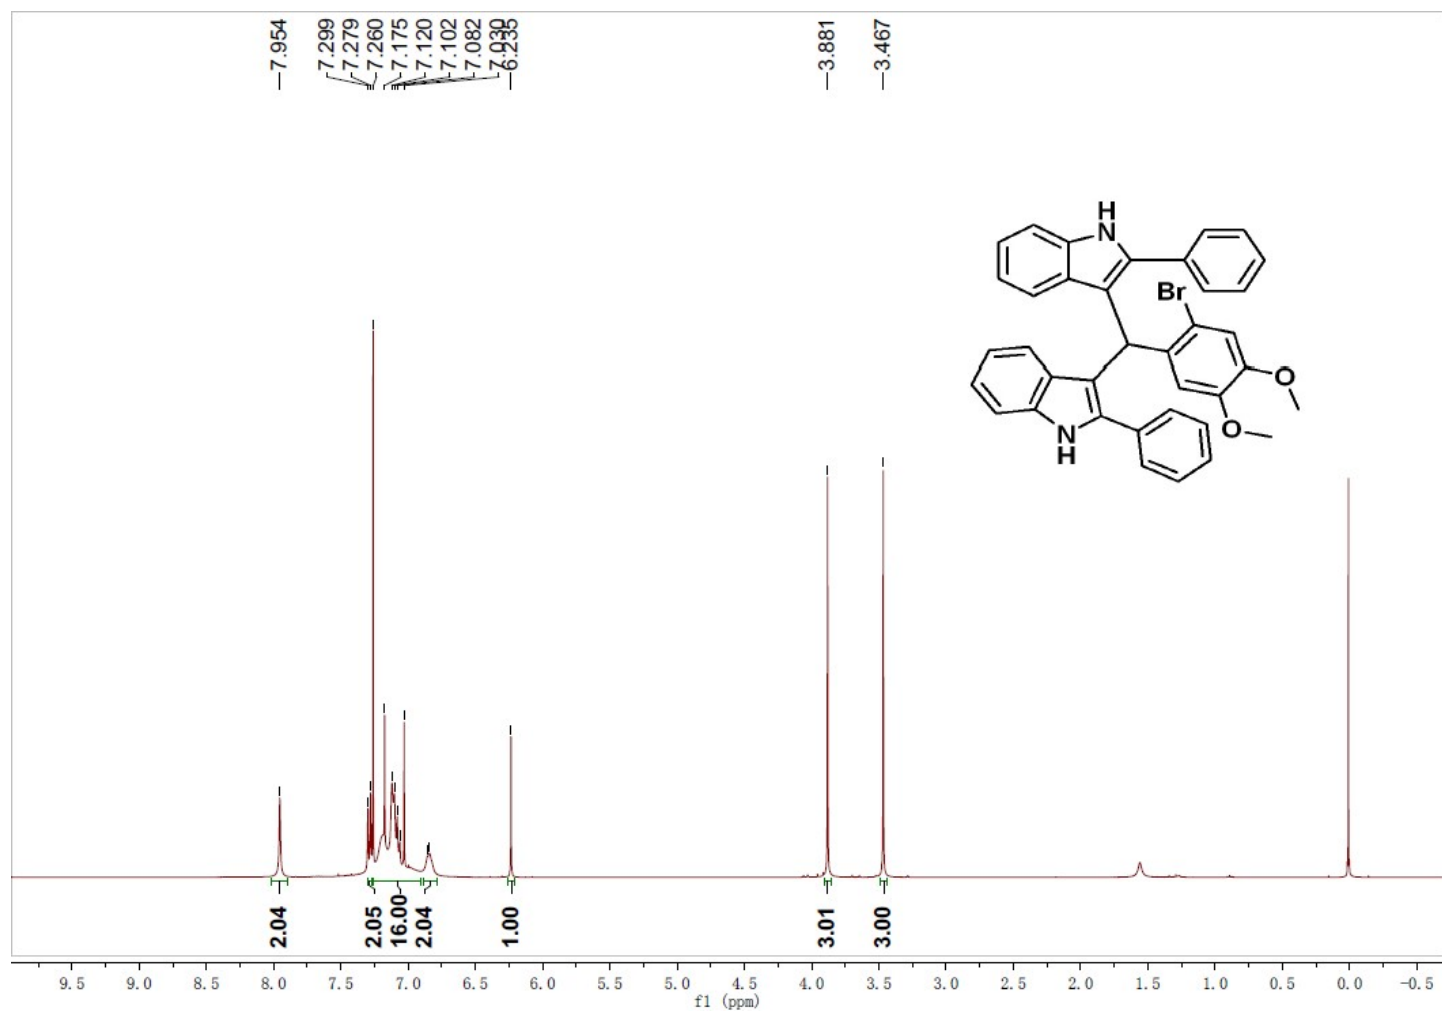

**<sup>1</sup>H NMR Spectrum of Compound 3al**

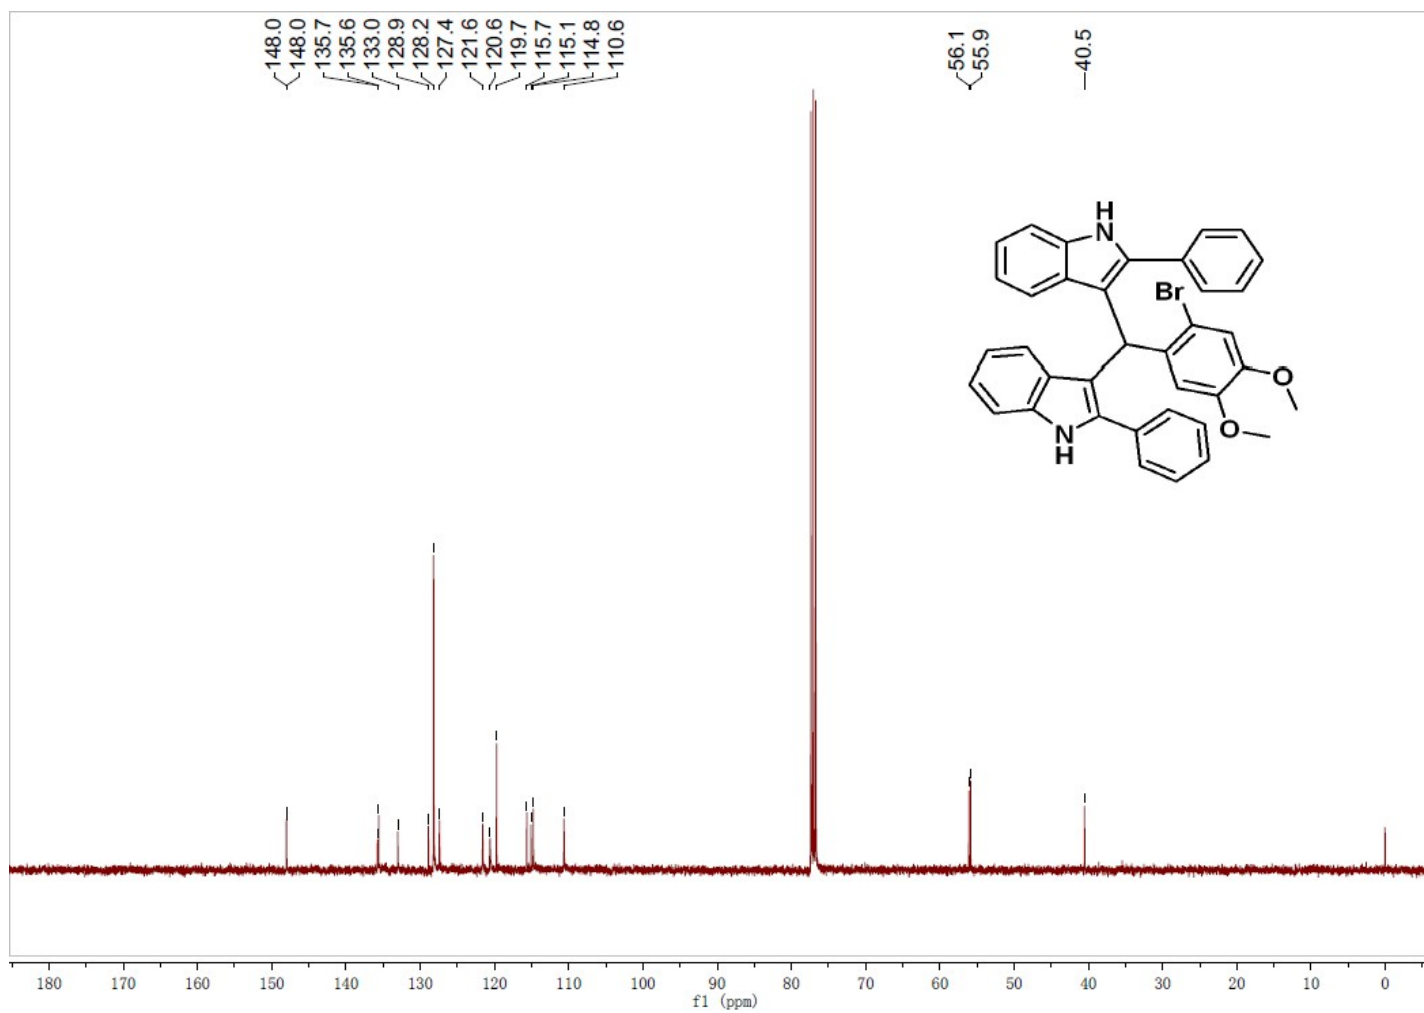

**<sup>13</sup>C NMR Spectrum of Compound 3a1**

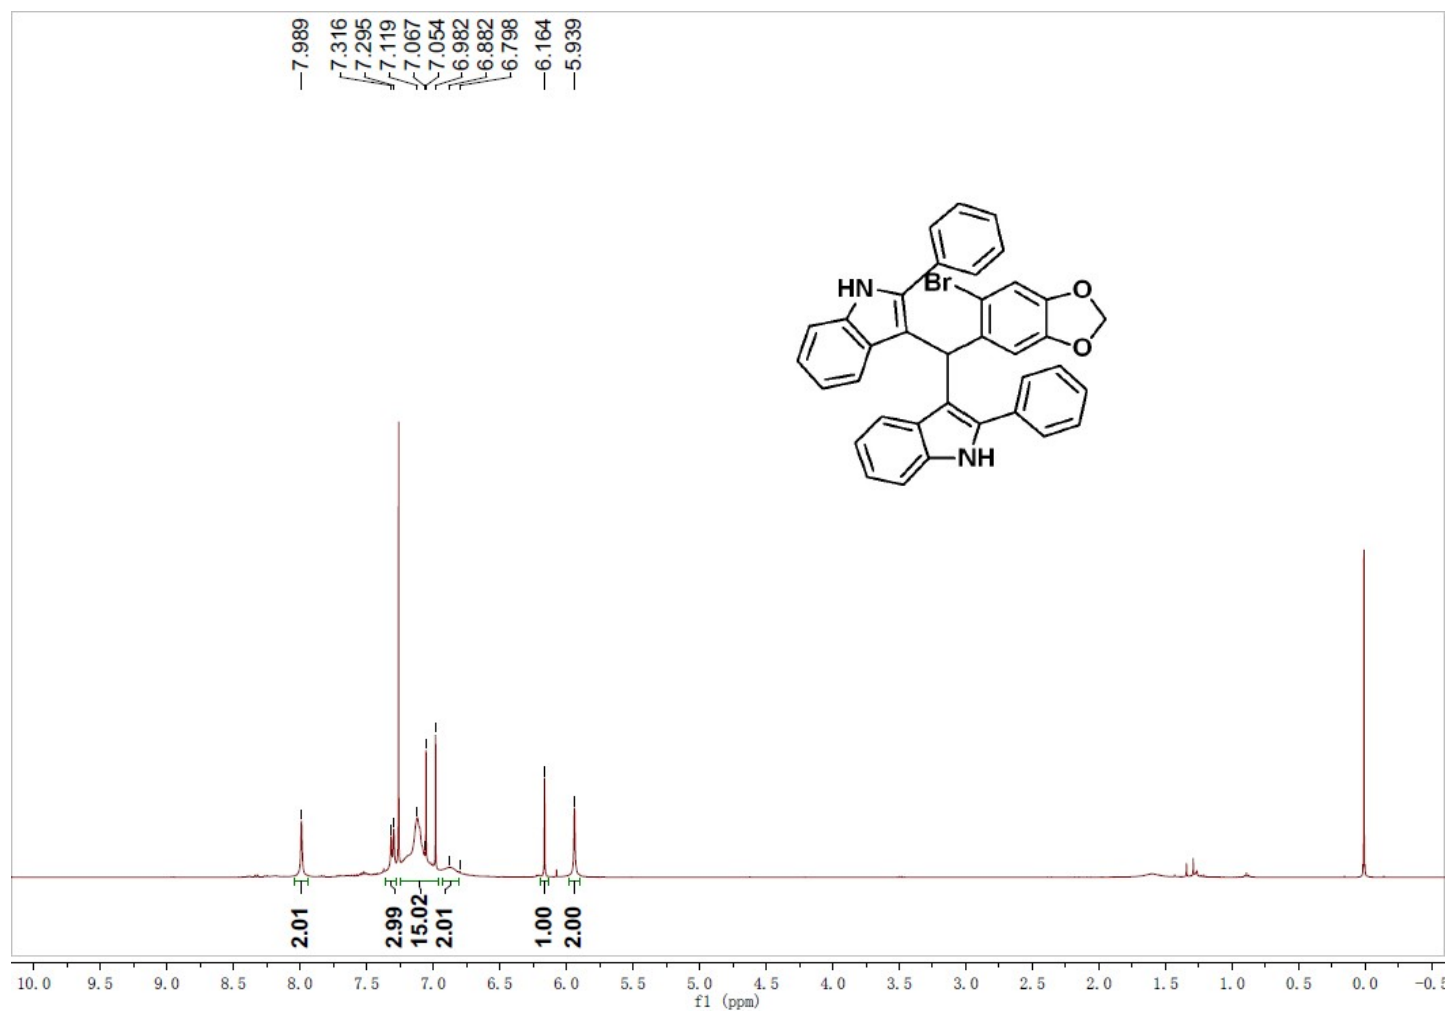

**<sup>1</sup>H NMR Spectrum of Compound 3am**

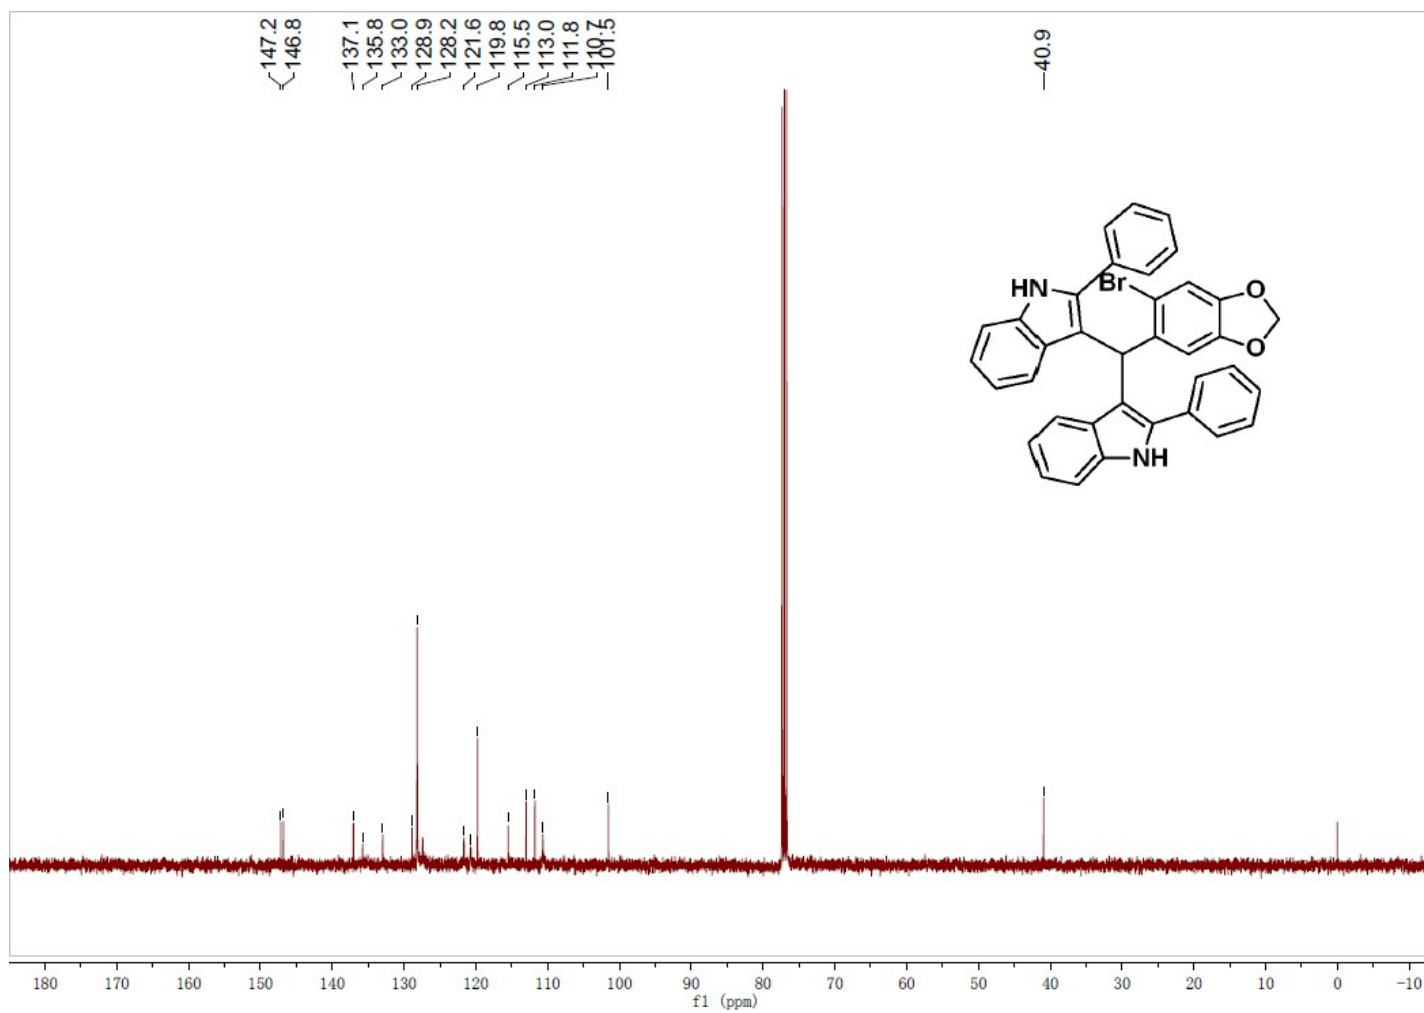

$^{13}\text{C}$  NMR Spectrum of Compound 3am



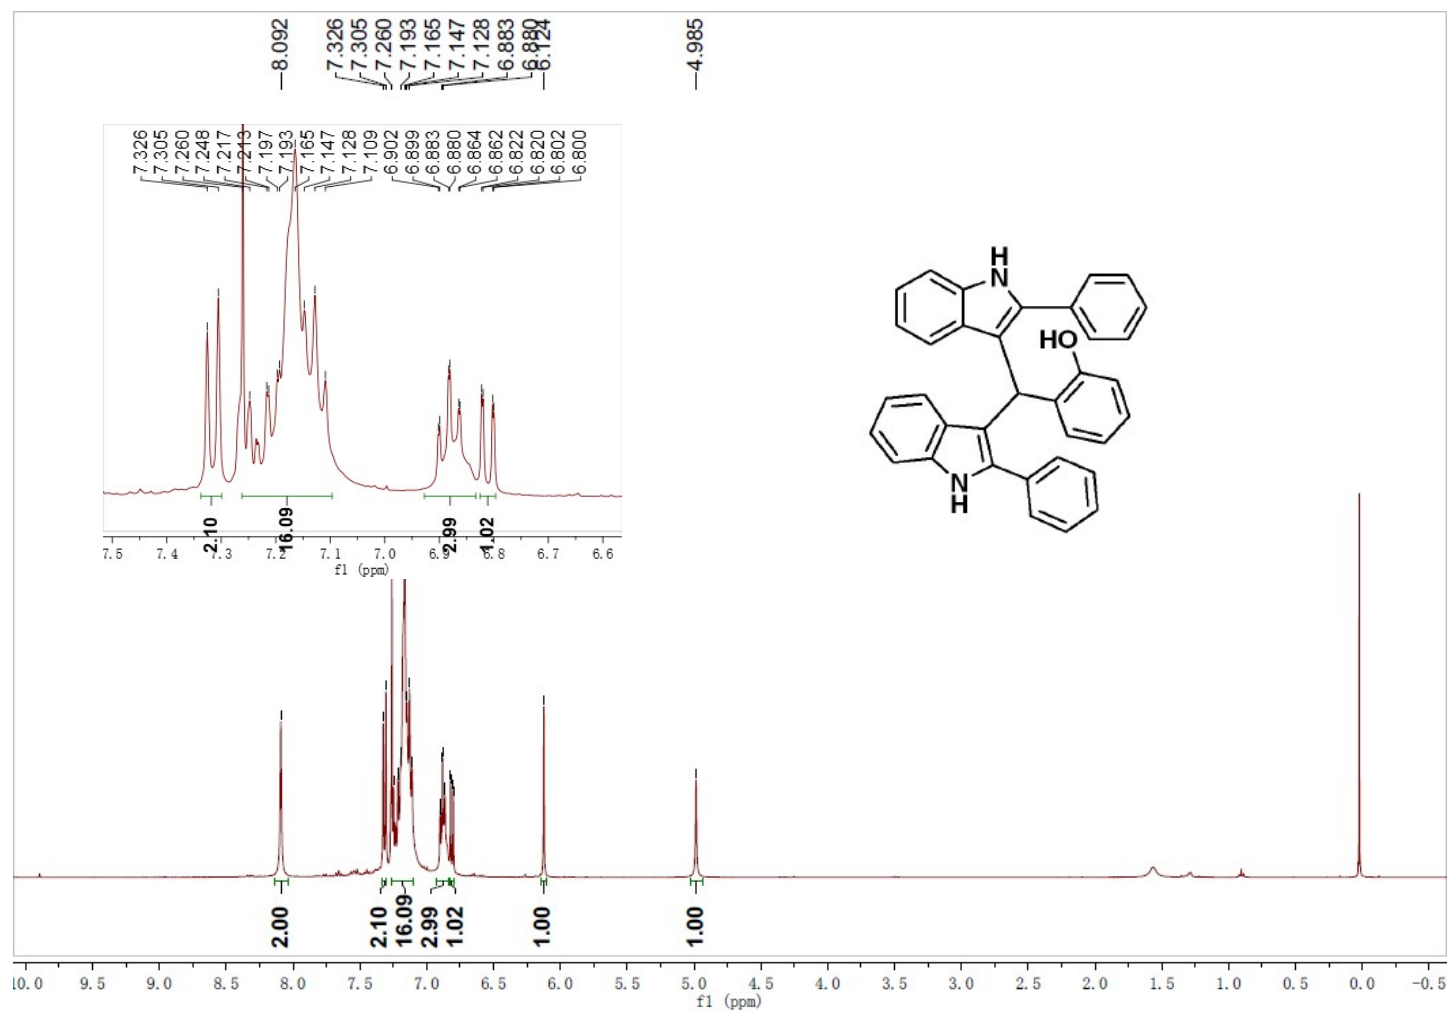

**<sup>1</sup>H NMR Spectrum of Compound 3an**

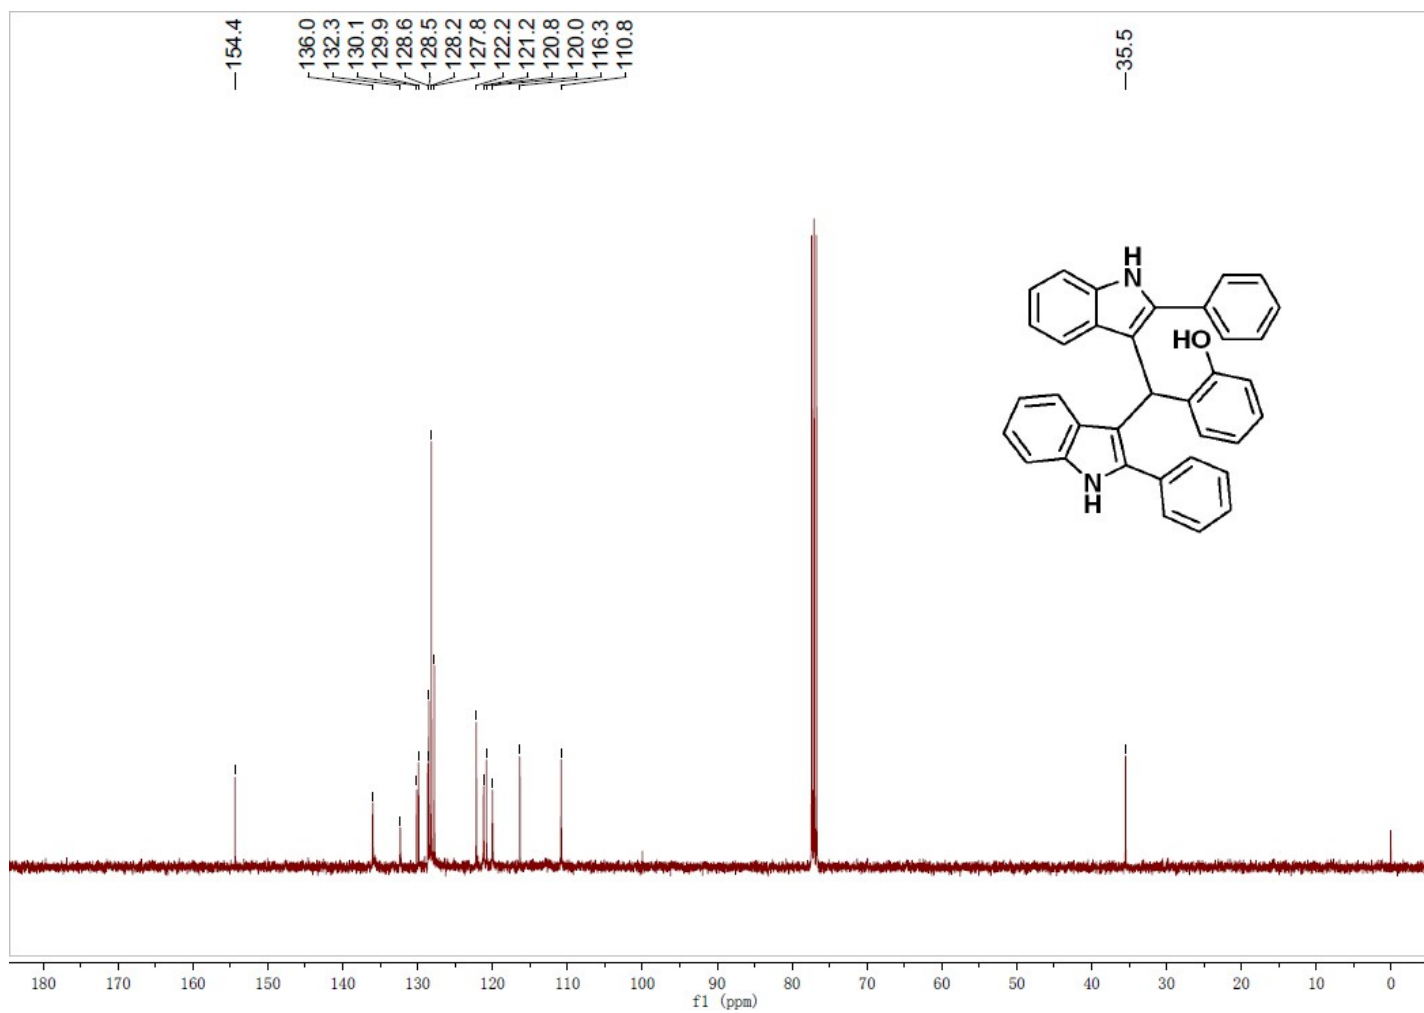

$^{13}\text{C}$  NMR Spectrum of Compound 3an

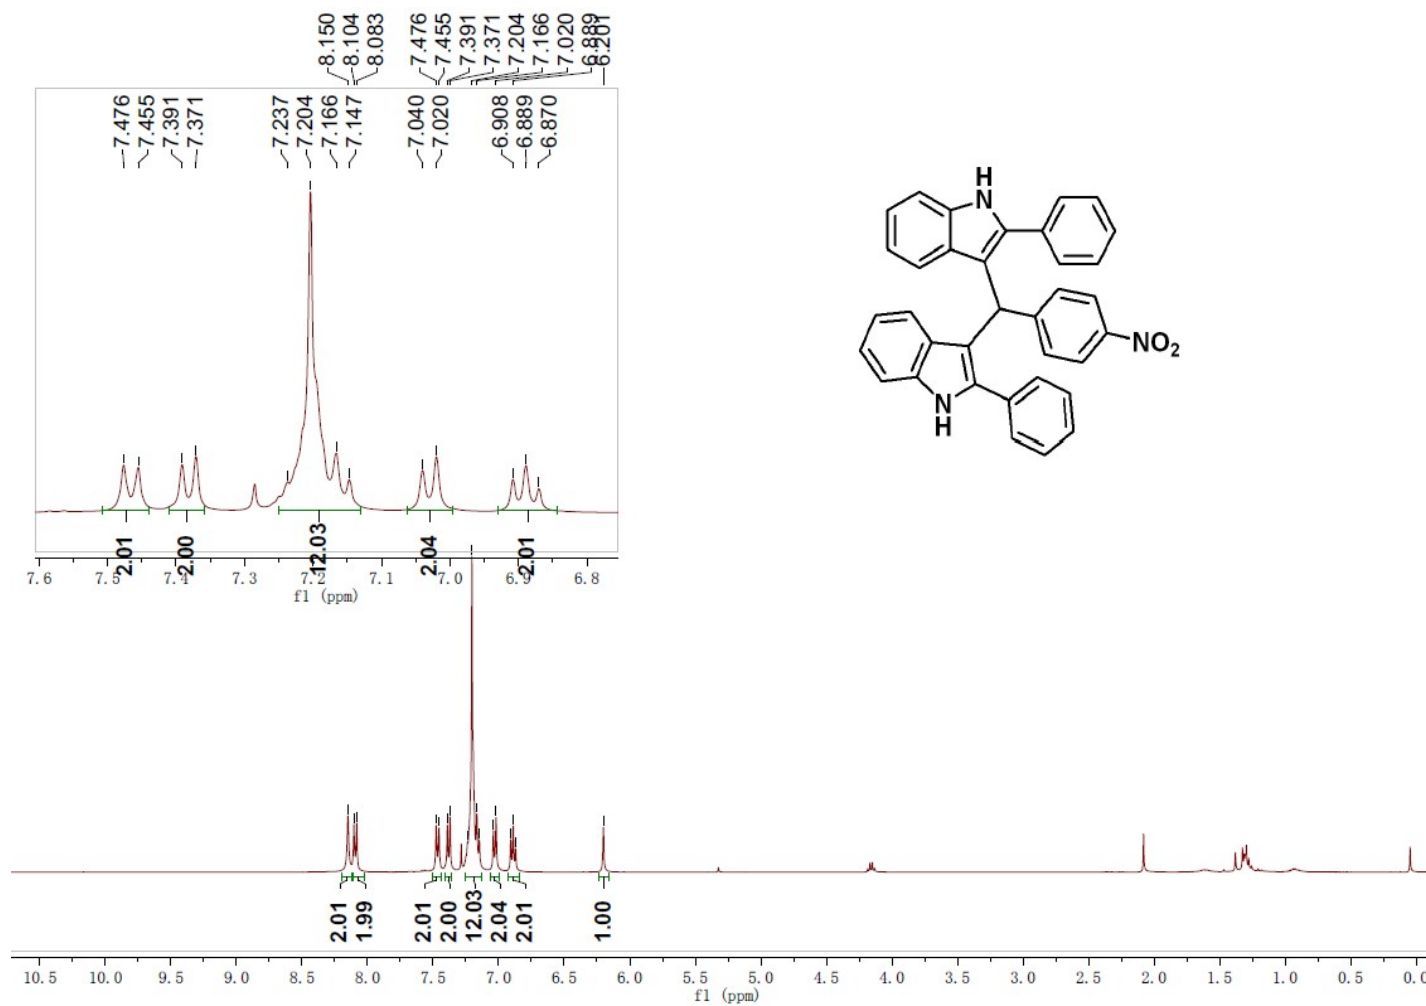

**<sup>1</sup>H NMR Spectrum of Compound 3ao**

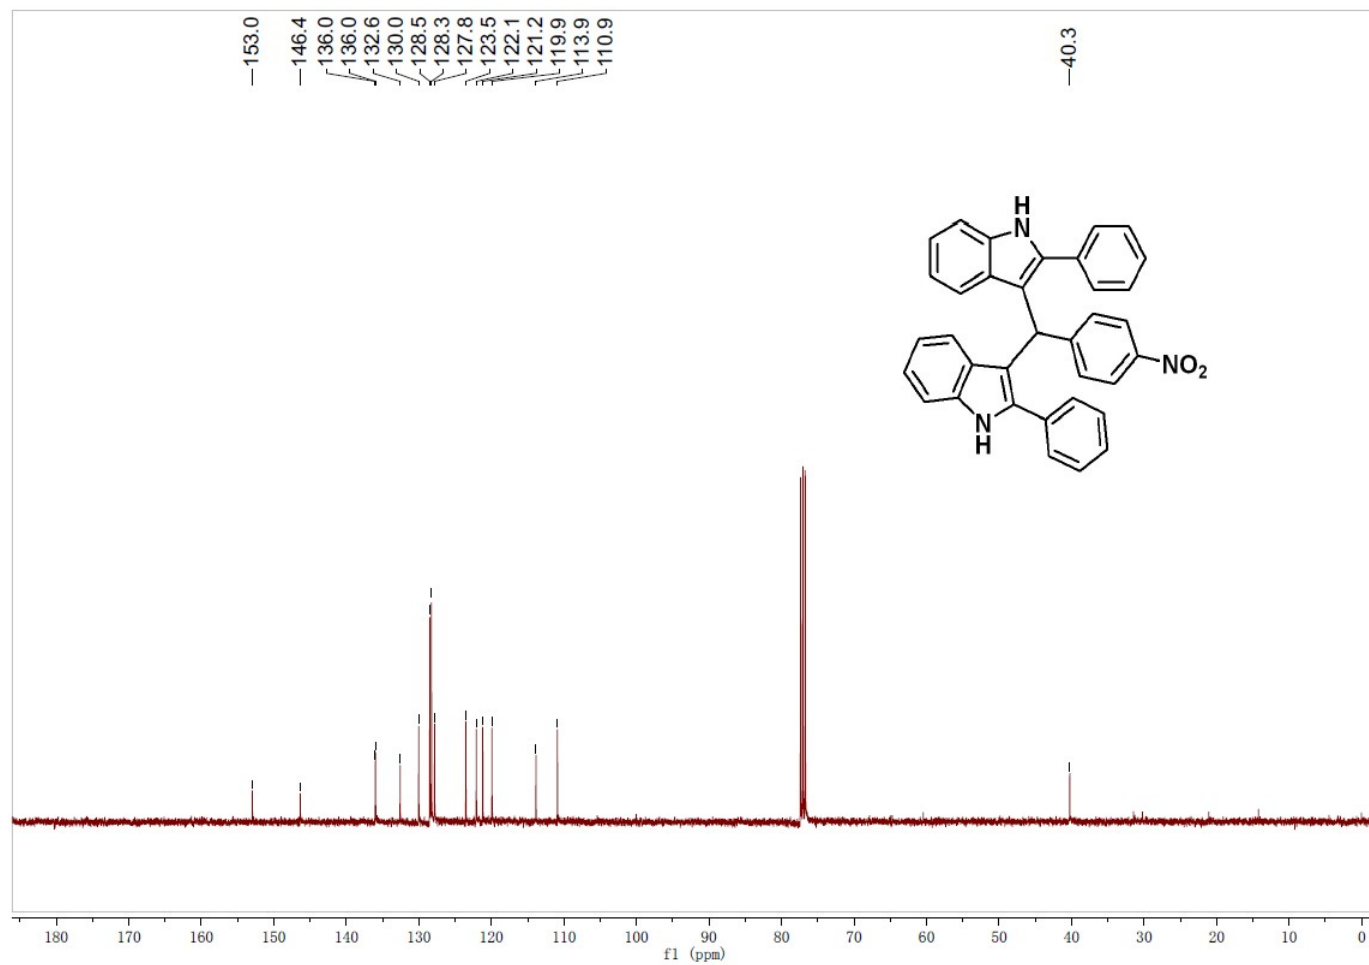

**<sup>13</sup>C NMR Spectrum of Compound 3ao**

### Copies of $^1\text{H}$ and $^{13}\text{C}$ NMR Spectra for Compound 5a

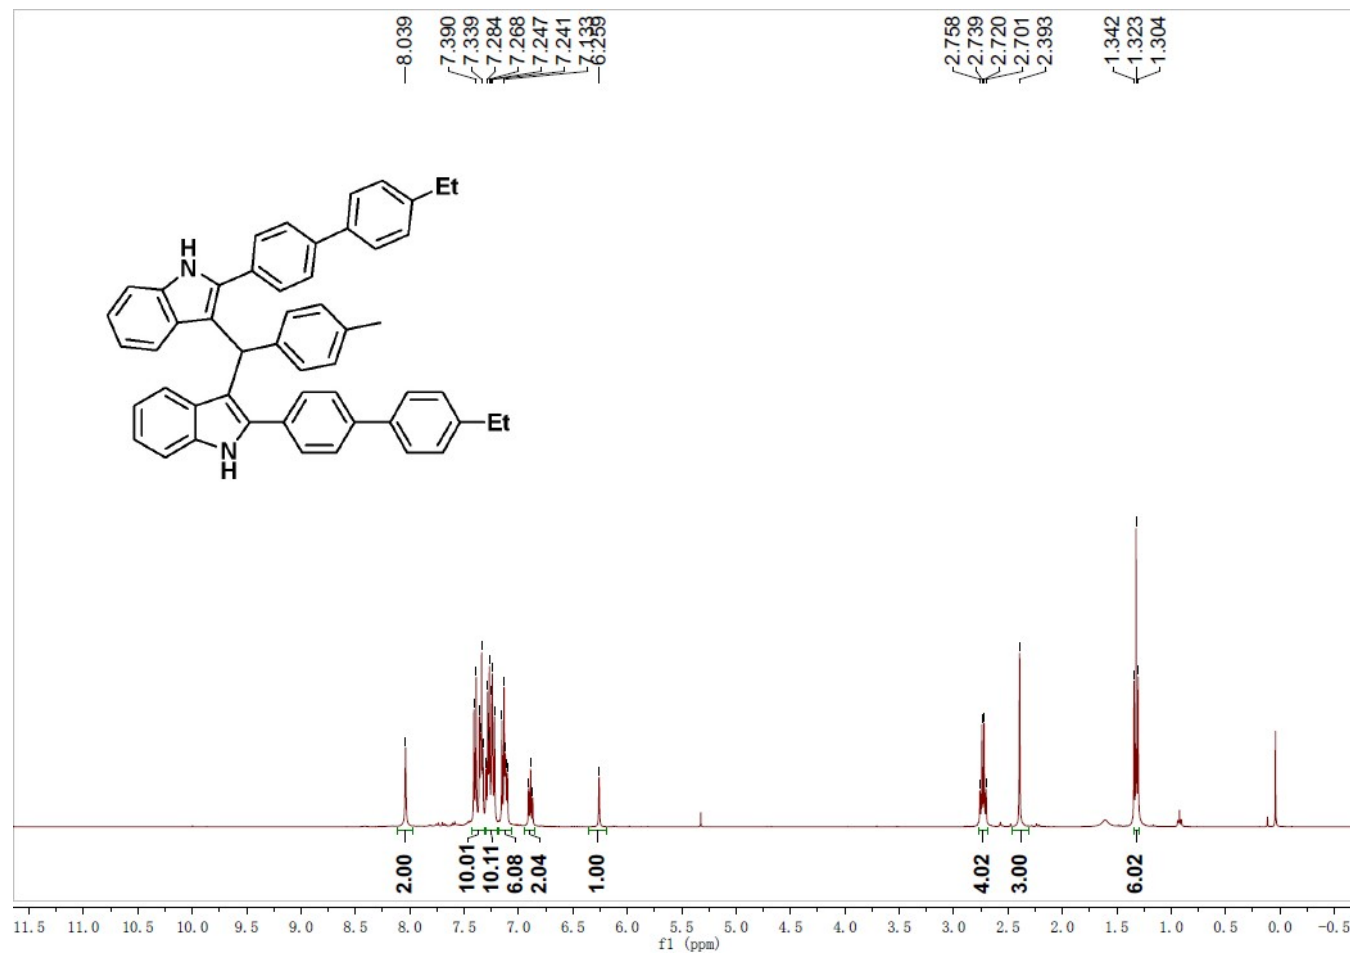

$^1\text{H}$  NMR Spectrum of Compound 5a

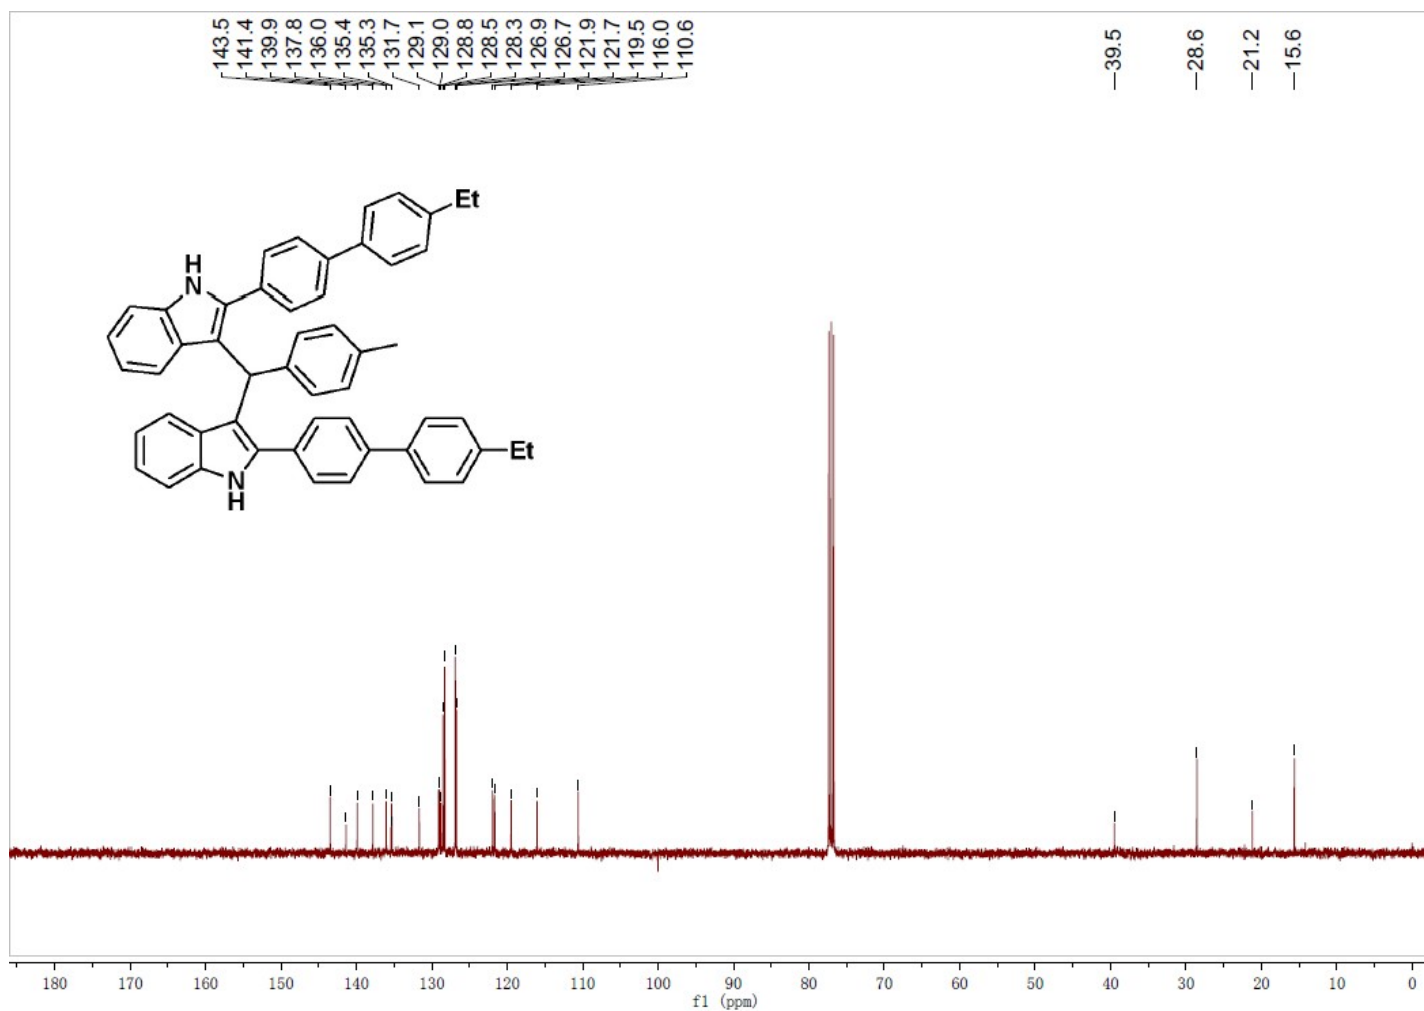

<sup>13</sup>C NMR Spectrum of Compound 5a
